# Supplementary material
Source: Royal Society of Chemistry journal article supplement (doi:10.1039/d6nj00814c)
Supplement: d6nj00814c1.pdf [file d6nj00814c1.pdf]

Electronic Supplementary Information

**Unraveling the Mechanism of Pd-Catalyzed Hydrocyanation of Methylene-cyclopropane or Cyclopropene with  
Me<sub>2</sub>C(OH)CN: A DFT Study**

Jinxia Li,<sup>\*a</sup> Kai Li<sup>a</sup> and Shuanglin Qu<sup>\*b</sup>

*<sup>a</sup>Shanxi Provincial Department-Municipal Key Laboratory Cultivation Base for Quality Enhancement and Utilization of  
Shangdang Chinese Medicinal Materials, School of Pharmacy, Changzhi Medical College, Changzhi, Shanxi, 046000, P.  
R. China*

*<sup>b</sup>College of Chemistry and Chemical Engineering, Hunan University, Changsha 410082, P. R. China*

Emails: [squ@hnu.edu.cn](mailto:squ@hnu.edu.cn)

[lijinxia@czmc.edu.cn](mailto:lijinxia@czmc.edu.cn)

**Table of Contents**

|                                                               |                 |
|---------------------------------------------------------------|-----------------|
| <b>Additional data information.....</b>                       | <b>S2-S10</b>   |
| <b>Cartesian Coordinates (Å) of Optimized Structures.....</b> | <b>S11-S147</b> |

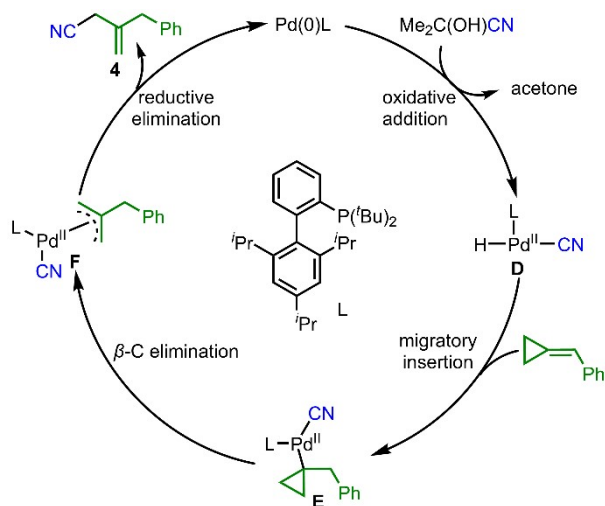

**Scheme S1** Proposed mechanisms for the Pd-catalyzed hydrocyanation of methylenecyclopropane.

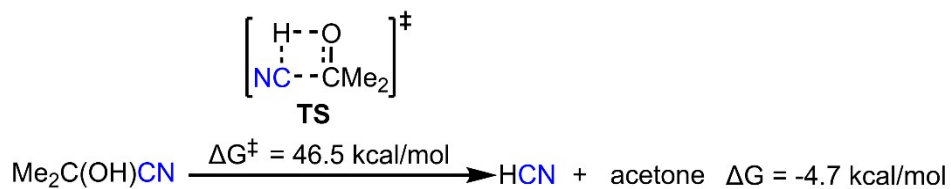

**Scheme S2** The activation energy for the decomposition of Me<sub>2</sub>C(OH)CN into HCN and acetone.

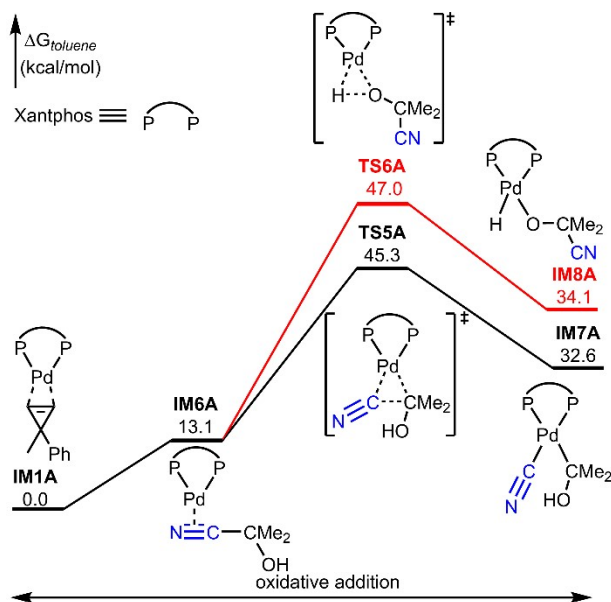

**Fig. S1** Calculated free energy profiles for the O–H bond cleavage or C–C bond cleavage of Me<sub>2</sub>C(OH)CN in the cyclopropene system.

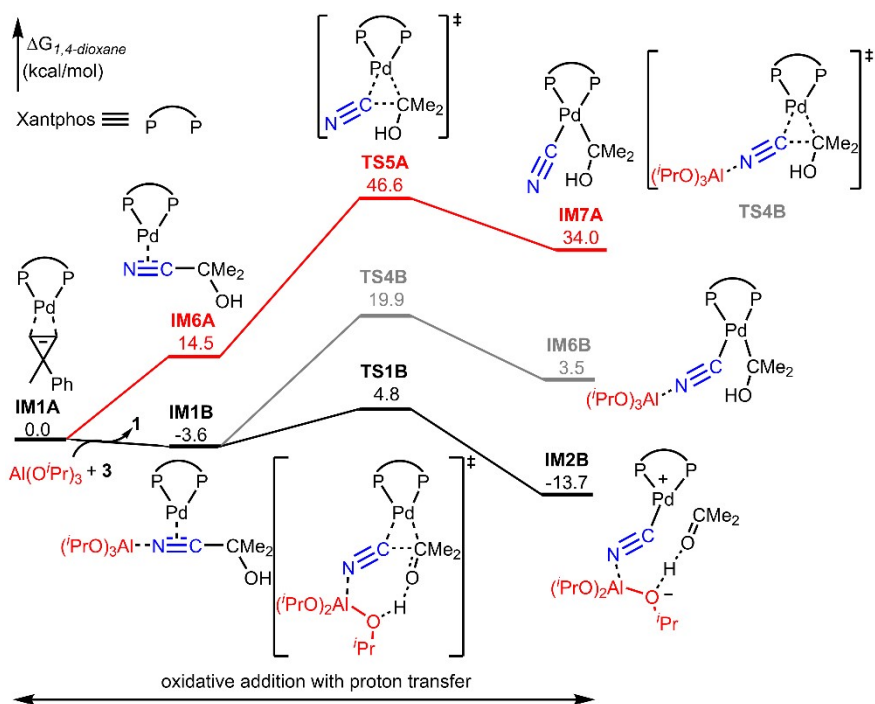

**Fig. S2** Calculated free energy profiles for C–C bond activation of  $\text{Me}_2\text{C}(\text{OH})\text{CN}$  with or without  $\text{Al}(\text{O}^i\text{Pr})_3$  in the cyclopropene system.

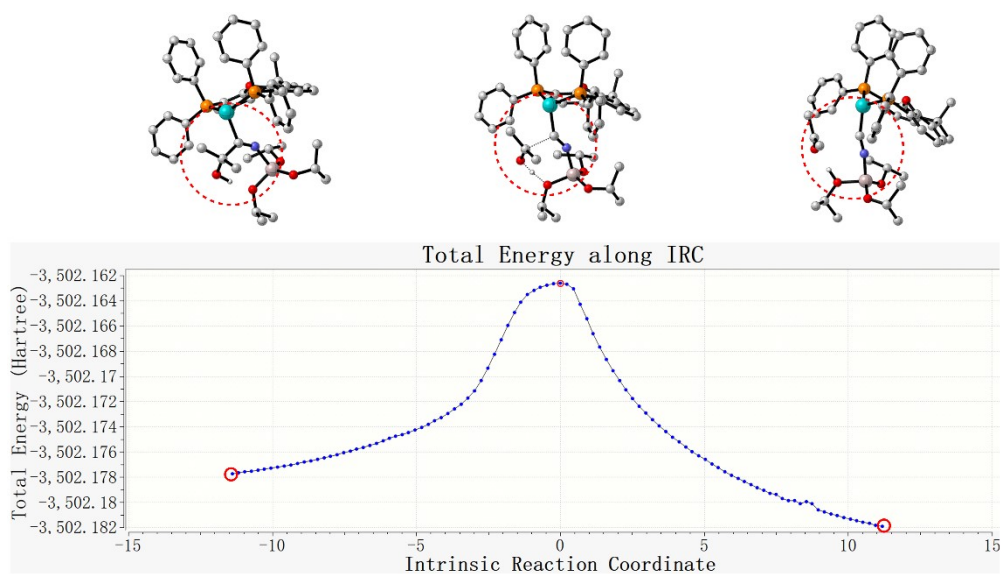

**Fig. S3** The IRC for  $\text{TS1B}$  links the reactants and products.

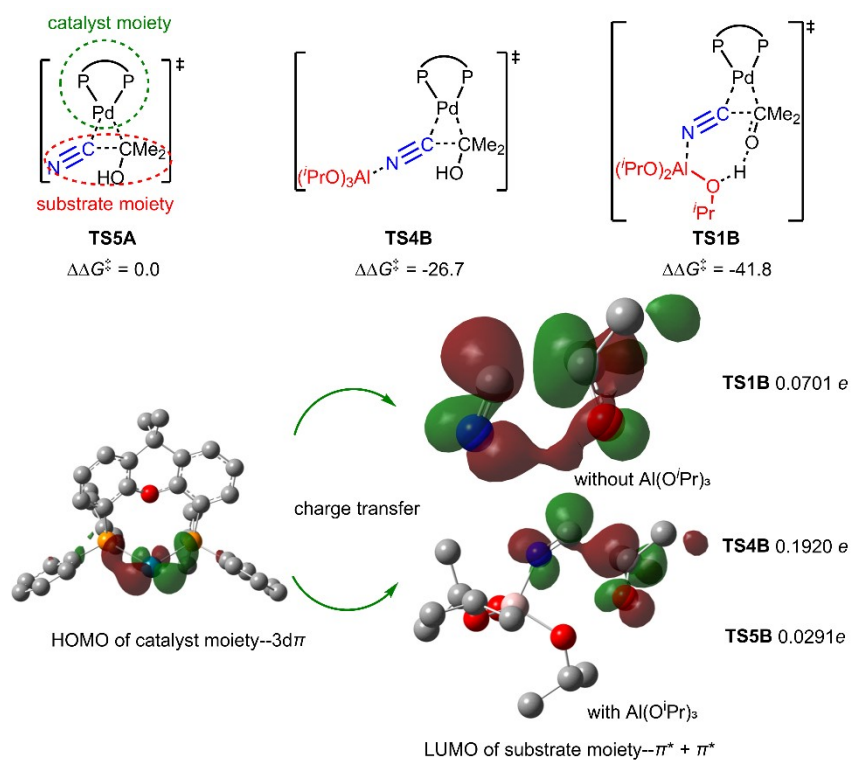

**Fig. S4** Fragment molecular orbital analysis and charge transfer of the **TS1B**, **TS4B**, and **TS5A** corresponding to the C–C bond cleavage.

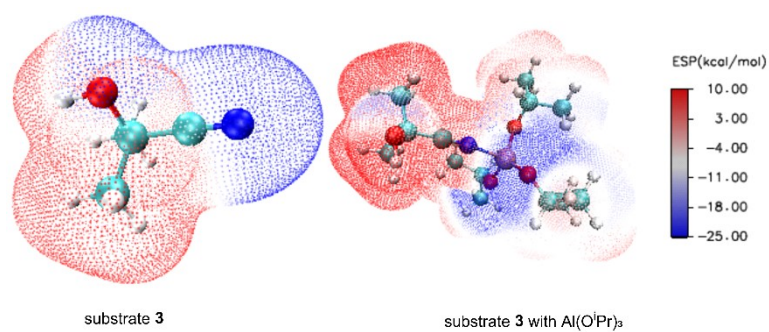

**Fig. S5** ESP of the Me<sub>2</sub>C(OH)CN with or without Al(O*i*Pr)<sub>3</sub>.

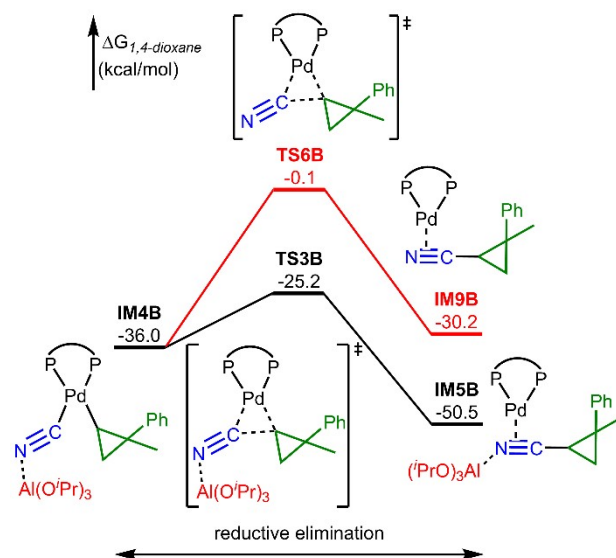

**Fig. S6** Calculated free energy profiles for **TS3B** and **TS6B**.

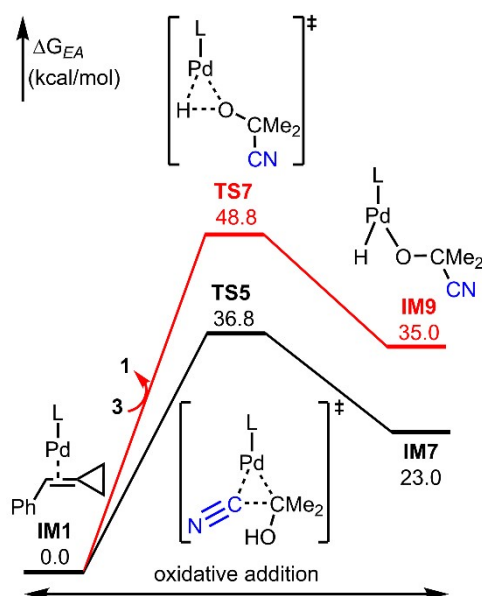

**Fig. S7** Calculated free energy profiles for the O–H bond cleavage or C–C bond cleavage of Me<sub>2</sub>C(OH)CN in the methylenecyclopropane system.

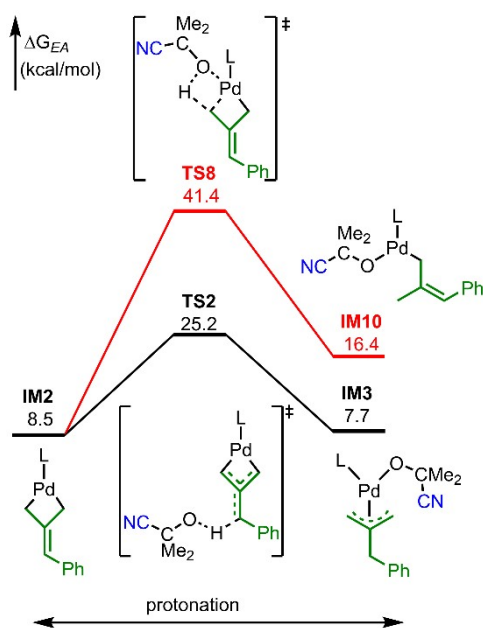

**Fig. S8** Calculated free energy profiles for possible protonation transition states **TS2** and **TS8**.

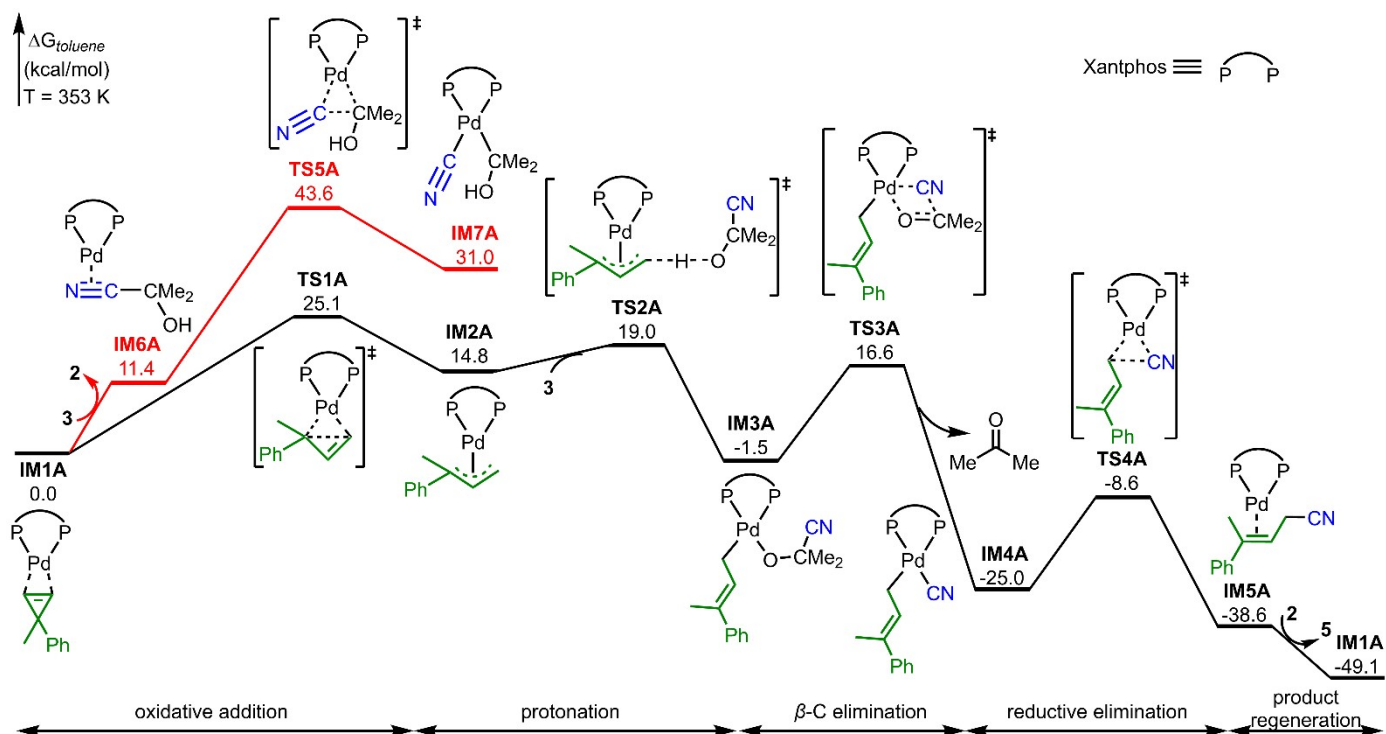

**Fig. S9** Calculated free energy profiles for Pd-catalyzed hydrocyanation of **2** with **3** to yield ring-opening product **5** in the absence of  $\text{Al}(\text{O}^i\text{Pr})_3$  at 353 K.

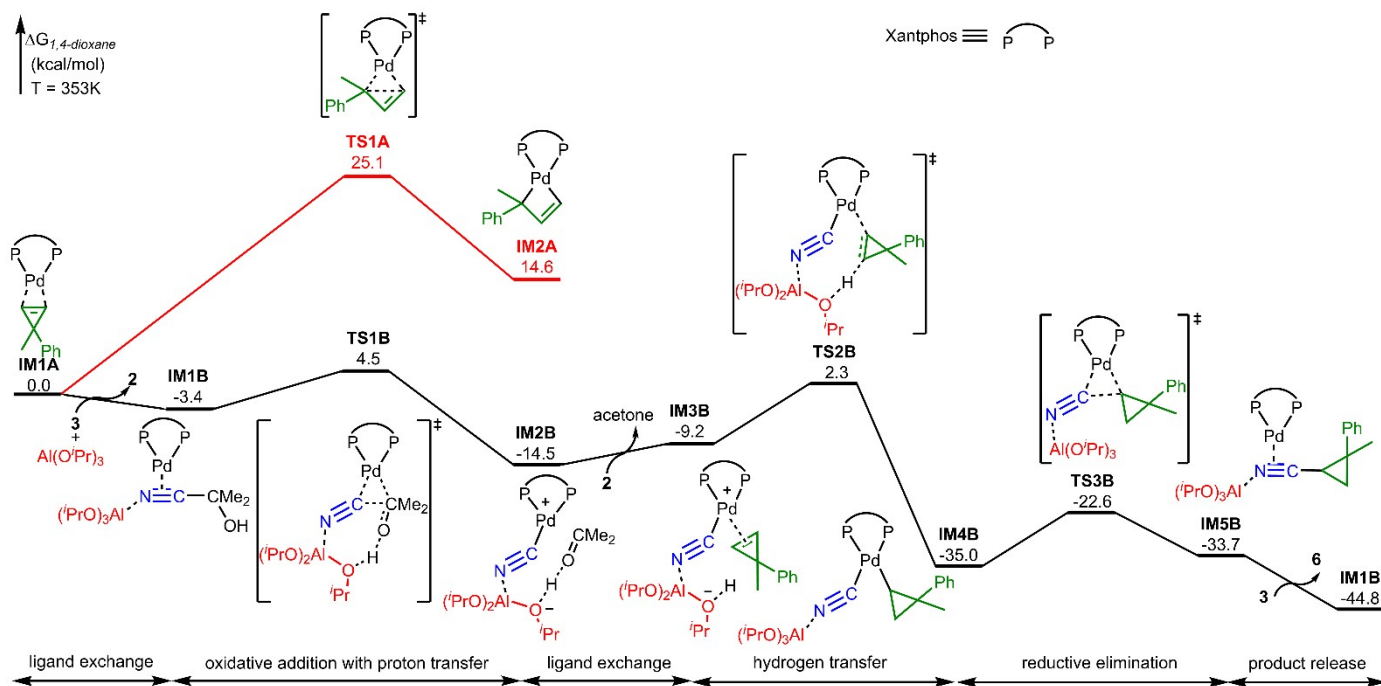

**Fig. S10** Calculated free energy profiles for Pd-catalyzed hydrocyanation of **2** with **3** to yield ring-retentive product **6** in the presence of  $\text{Al}(\text{O}^i\text{Pr})_3$  at 353 K.

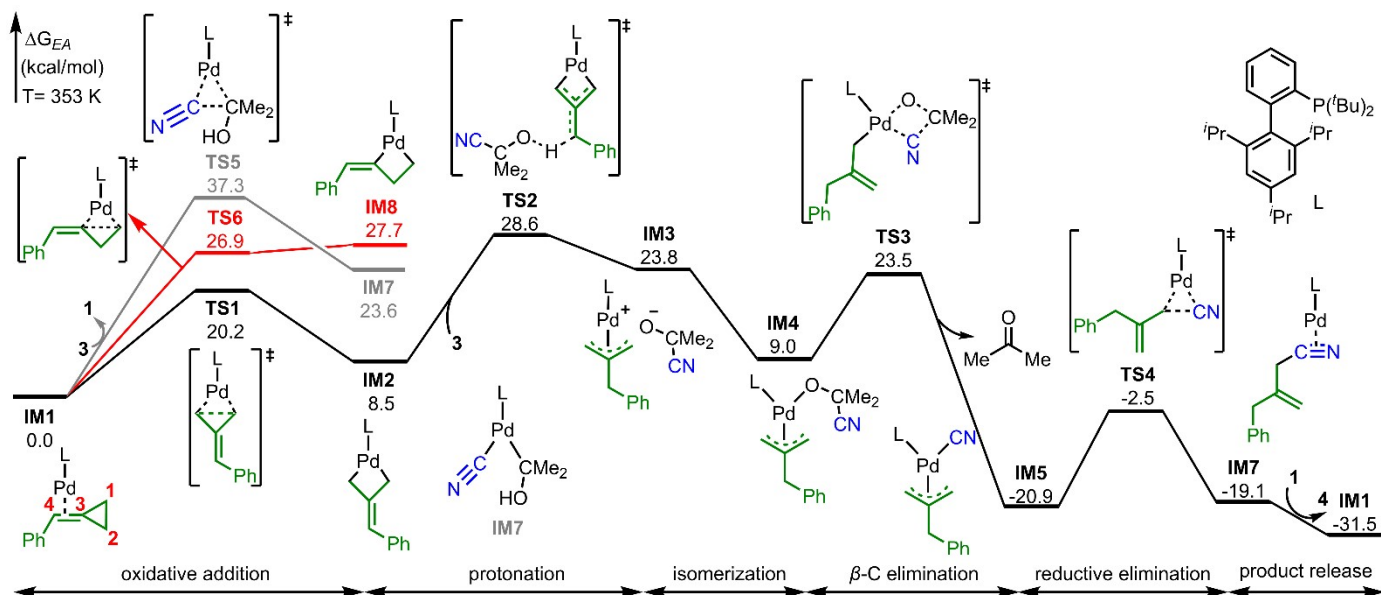

**Fig. S11** Calculated free energy profiles for Pd-catalyzed hydrocyanation of **1** with **3** to afford ring-opening product at 353 K.

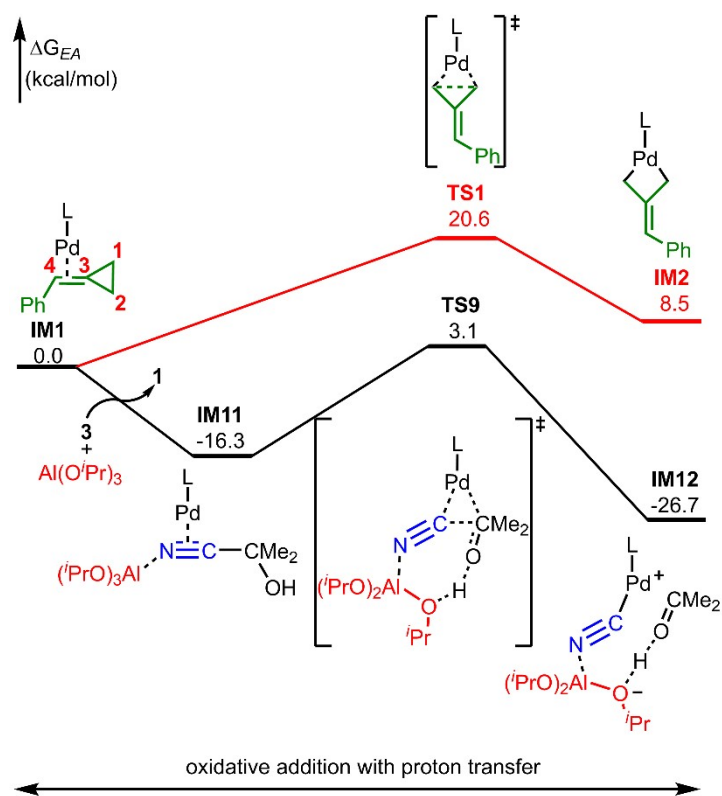

**Fig. S12** Calculated free energy profiles for the oxidative addition with proton transfer of  $\text{Me}_2\text{C}(\text{OH})\text{CN}$  in the presence of  $\text{Al}(\text{O}^i\text{Pr})_3$  in the methylenecyclopropane system.

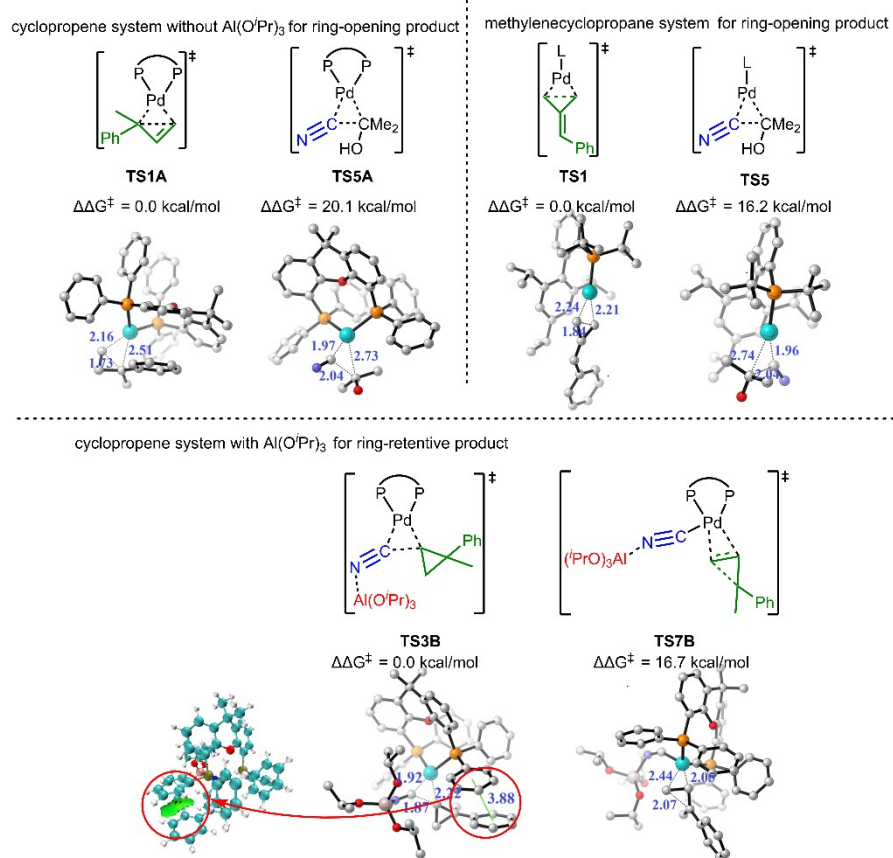

**Fig. S13** The chemoselectivity-determining step in the three system.

**Table S1** Comparison of activation barrier difference ( $\Delta\Delta G^\ddagger$ ) of key transition states obtained with different DFT functionals in single-point energy calculations.

|                                             | M06   | M06-L | M06-2X | MN15  | B3LYP-GD3(BJ) |
|---------------------------------------------|-------|-------|--------|-------|---------------|
| $\Delta\Delta G^\ddagger(\text{TS5A-TS1A})$ | 20.1  | 16.9  | 20.6   | 22.4  | 20.7          |
| $\Delta\Delta G^\ddagger(\text{TS1B-TS1A})$ | -20.3 | -24.7 | -18.4  | -18.6 | -22.9         |
| $\Delta\Delta G^\ddagger(\text{TS5-TS1})$   | 17.2  | 11.6  | 16.3   | 17.5  | 16.2          |

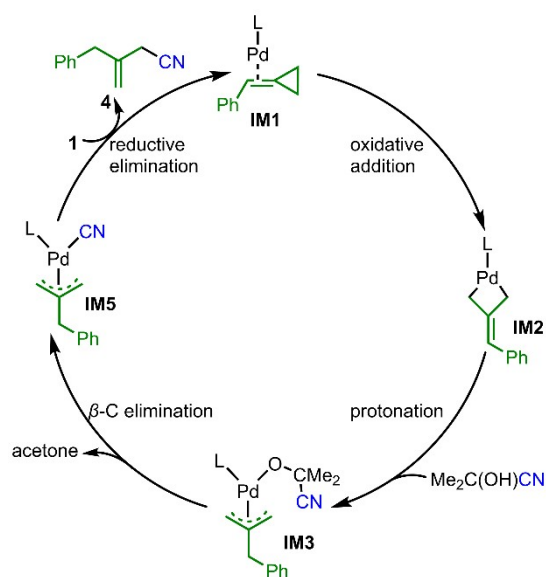

**Scheme S3** Revised mechanisms for the Pd-catalyzed hydrocyanation of methylenecyclopropane system.

## Cartesian Coordinates (Å) of Optimized Structures.

1

SCF Energy: -387.051169316

|                                              |             |
|----------------------------------------------|-------------|
| Sum of electronic and zero-point Energies=   | -386.883472 |
| Sum of electronic and thermal Energies=      | -386.874934 |
| Sum of electronic and thermal Enthalpies=    | -386.873990 |
| Sum of electronic and thermal Free Energies= | -386.917518 |

Electronic energy in solution by single point calculation = -386.818836883

|   |           |           |           |
|---|-----------|-----------|-----------|
| 6 | 3.591442  | -0.296384 | 0.000239  |
| 6 | 2.802174  | 1.023769  | 0.000012  |
| 1 | 4.118284  | -0.574365 | -0.912062 |
| 1 | 4.117129  | -0.574050 | 0.913330  |
| 1 | 2.801823  | 1.618991  | -0.912915 |
| 1 | 2.801777  | 1.619631  | 0.912504  |
| 6 | 2.125564  | -0.278760 | -0.000037 |
| 6 | 0.993583  | -0.977184 | -0.000239 |
| 1 | 1.063384  | -2.065051 | -0.000319 |
| 6 | -0.368635 | -0.429849 | -0.000209 |
| 6 | -1.461445 | -1.312827 | -0.000020 |
| 6 | -0.631883 | 0.952485  | -0.000164 |
| 6 | -2.771643 | -0.837583 | 0.000136  |
| 1 | -1.274426 | -2.384051 | 0.000006  |
| 6 | -1.939682 | 1.427025  | -0.000004 |
| 1 | 0.197617  | 1.651167  | -0.000332 |
| 6 | -3.017159 | 0.535860  | 0.000157  |
| 1 | -3.600490 | -1.540201 | 0.000286  |
| 1 | -2.122112 | 2.498360  | -0.000028 |
| 1 | -4.036879 | 0.910248  | 0.000303  |

2

SCF Energy: -387.016796892

|                                              |              |
|----------------------------------------------|--------------|
| Sum of electronic and zero-point Energies=   | -386.8513609 |
| Sum of electronic and thermal Energies=      | -386.8432589 |
| Sum of electronic and thermal Enthalpies=    | -386.8423149 |
| Sum of electronic and thermal Free Energies= | -386.8839259 |

Electronic energy in solution by single point calculation = -386.788746868

|   |           |           |           |
|---|-----------|-----------|-----------|
| 6 | -2.280897 | -0.986043 | 0.647246  |
| 6 | -2.281091 | -0.986137 | -0.646864 |
| 6 | -1.502482 | 0.142266  | -0.000046 |
| 1 | -2.549925 | -1.445691 | 1.587257  |
| 1 | -2.549942 | -1.446523 | -1.586578 |
| 6 | 0.005854  | 0.064721  | -0.000092 |
| 6 | 0.803629  | 1.218416  | 0.000031  |

|   |           |           |           |
|---|-----------|-----------|-----------|
| 6 | 0.658416  | -1.179343 | -0.000176 |
| 6 | 2.196843  | 1.133412  | 0.000129  |
| 1 | 0.340014  | 2.198552  | 0.000092  |
| 6 | 2.048018  | -1.267196 | -0.000092 |
| 1 | 0.066522  | -2.089111 | -0.000282 |
| 6 | 2.827822  | -0.109129 | 0.000054  |
| 1 | 2.788225  | 2.045296  | 0.000254  |
| 1 | 2.523951  | -2.244389 | -0.000139 |
| 1 | 3.912134  | -0.175908 | 0.000123  |
| 6 | -2.100935 | 1.543567  | -0.000192 |
| 1 | -1.794802 | 2.114886  | 0.885239  |
| 1 | -1.794723 | 2.114697  | -0.885724 |
| 1 | -3.192511 | 1.480992  | -0.000235 |

### 3

SCF Energy: -286.601018723

|                                              |             |
|----------------------------------------------|-------------|
| Sum of electronic and zero-point Energies=   | -286.494154 |
| Sum of electronic and thermal Energies=      | -286.487146 |
| Sum of electronic and thermal Enthalpies=    | -286.486202 |
| Sum of electronic and thermal Free Energies= | -286.524197 |

Electronic energy in solution by single point calculation = -286.496080559

|   |           |           |           |
|---|-----------|-----------|-----------|
| 6 | -0.294572 | -0.001609 | 0.034865  |
| 6 | -0.871079 | -1.299251 | -0.538689 |
| 1 | -0.595943 | -1.413541 | -1.590610 |
| 1 | -0.497527 | -2.157483 | 0.025085  |
| 1 | -1.961066 | -1.266583 | -0.451567 |
| 6 | -0.816934 | 1.234227  | -0.713650 |
| 1 | -1.907113 | 1.262708  | -0.626605 |
| 1 | -0.403311 | 2.152769  | -0.282923 |
| 1 | -0.541015 | 1.201921  | -1.772101 |
| 8 | -0.682498 | 0.026486  | 1.405542  |
| 1 | -0.334278 | 0.841701  | 1.802370  |
| 6 | 1.190585  | -0.032816 | -0.055725 |
| 7 | 2.350320  | -0.033812 | -0.101255 |

### 4

SCF Energy: -480.544617993

|                                              |             |
|----------------------------------------------|-------------|
| Sum of electronic and zero-point Energies=   | -480.354889 |
| Sum of electronic and thermal Energies=      | -480.343850 |
| Sum of electronic and thermal Enthalpies=    | -480.342906 |
| Sum of electronic and thermal Free Energies= | -480.393602 |

Electronic energy in solution by single point calculation = -480.273828142

|   |           |           |          |
|---|-----------|-----------|----------|
| 6 | -2.788235 | -0.002990 | 0.788783 |
|---|-----------|-----------|----------|

|   |           |           |           |
|---|-----------|-----------|-----------|
| 6 | -1.230393 | 0.004710  | -1.180579 |
| 1 | -2.890087 | 0.870382  | 1.449028  |
| 1 | -2.889921 | -0.881246 | 1.442535  |
| 1 | -0.233927 | 0.006426  | -1.607665 |
| 1 | -2.069502 | 0.007319  | -1.868977 |
| 6 | -1.411231 | -0.000434 | 0.139896  |
| 6 | -0.286522 | -0.004273 | 1.160959  |
| 6 | 1.104322  | -0.002134 | 0.575609  |
| 6 | 1.753471  | 1.203136  | 0.284497  |
| 6 | 1.753788  | -1.205225 | 0.276350  |
| 6 | 3.025345  | 1.207923  | -0.288380 |
| 1 | 1.255401  | 2.143627  | 0.507335  |
| 6 | 3.025671  | -1.205785 | -0.296539 |
| 1 | 1.255988  | -2.147346 | 0.492809  |
| 6 | 3.665377  | 0.002125  | -0.580211 |
| 1 | 3.516758  | 2.152320  | -0.504942 |
| 1 | 3.517339  | -2.148565 | -0.519479 |
| 1 | 4.656714  | 0.003758  | -1.024245 |
| 1 | -0.412692 | 0.868187  | 1.819348  |
| 1 | -0.412747 | -0.881585 | 1.812847  |
| 6 | -3.907943 | 0.000396  | -0.152983 |
| 7 | -4.787890 | 0.003147  | -0.909000 |

## 5

SCF Energy: -480.548787544

|                                              |             |
|----------------------------------------------|-------------|
| Sum of electronic and zero-point Energies=   | -480.359047 |
| Sum of electronic and thermal Energies=      | -480.347719 |
| Sum of electronic and thermal Enthalpies=    | -480.346775 |
| Sum of electronic and thermal Free Energies= | -480.398050 |

Electronic energy in solution by single point calculation = -480.273614107

|   |           |           |           |
|---|-----------|-----------|-----------|
| 6 | 2.858470  | -0.144657 | 0.997925  |
| 6 | 1.369001  | -0.372662 | 0.813148  |
| 6 | 0.528452  | 0.467189  | 0.185283  |
| 1 | 3.236228  | -0.778852 | 1.807440  |
| 1 | 0.983805  | -1.295221 | 1.236542  |
| 6 | 0.981398  | 1.784133  | -0.402292 |
| 1 | 2.064957  | 1.832208  | -0.527226 |
| 1 | 0.526127  | 1.941273  | -1.385501 |
| 1 | 0.678847  | 2.628555  | 0.230998  |
| 6 | -0.912599 | 0.130140  | 0.057598  |
| 6 | -1.338454 | -1.200545 | -0.095181 |
| 6 | -1.890188 | 1.138852  | 0.076492  |
| 6 | -2.691748 | -1.513241 | -0.196928 |

|   |           |           |           |
|---|-----------|-----------|-----------|
| 1 | -0.597816 | -1.990933 | -0.166379 |
| 6 | -3.245164 | 0.826551  | -0.022523 |
| 1 | -1.592072 | 2.176805  | 0.185607  |
| 6 | -3.652783 | -0.501024 | -0.156980 |
| 1 | -2.995689 | -2.548656 | -0.322740 |
| 1 | -3.983255 | 1.623295  | 0.004953  |
| 1 | -4.708020 | -0.744144 | -0.241320 |
| 6 | 3.628466  | -0.447043 | -0.217347 |
| 7 | 4.214711  | -0.677223 | -1.192315 |
| 1 | 3.074811  | 0.890076  | 1.288663  |

## 6

SCF Energy: -480.539599571

|                                              |             |
|----------------------------------------------|-------------|
| Sum of electronic and zero-point Energies=   | -480.348730 |
| Sum of electronic and thermal Energies=      | -480.338359 |
| Sum of electronic and thermal Enthalpies=    | -480.337415 |
| Sum of electronic and thermal Free Energies= | -480.384859 |

Electronic energy in solution by single point calculation = -480.265475031

|   |           |           |           |
|---|-----------|-----------|-----------|
| 1 | 2.293075  | -0.403233 | 1.946817  |
| 6 | 3.004757  | -0.397358 | -0.700223 |
| 7 | 4.041695  | -0.080573 | -1.119599 |
| 6 | 1.724458  | -0.786515 | -0.173720 |
| 6 | 1.476574  | -0.748468 | 1.320217  |
| 6 | 0.789676  | 0.273898  | 0.450462  |
| 1 | 1.235204  | -1.572333 | -0.741593 |
| 1 | 0.889701  | -1.555476 | 1.746512  |
| 6 | -0.677487 | 0.103631  | 0.161338  |
| 6 | -1.488836 | 1.215225  | -0.104924 |
| 6 | -1.280879 | -1.165231 | 0.144590  |
| 6 | -2.849981 | 1.066453  | -0.376872 |
| 1 | -1.062997 | 2.211727  | -0.101357 |
| 6 | -2.637883 | -1.316379 | -0.128945 |
| 1 | -0.692518 | -2.055777 | 0.346496  |
| 6 | -3.432557 | -0.198968 | -0.391265 |
| 1 | -3.452671 | 1.947494  | -0.578734 |
| 1 | -3.074970 | -2.310915 | -0.134984 |
| 1 | -4.491178 | -0.315541 | -0.603589 |
| 6 | 1.319899  | 1.694097  | 0.521415  |
| 1 | 1.175755  | 2.223470  | -0.426168 |
| 1 | 0.811364  | 2.254515  | 1.313209  |
| 1 | 2.390921  | 1.697761  | 0.738147  |

acetone

SCF Energy: -193.161998777

|                                              |             |
|----------------------------------------------|-------------|
| Sum of electronic and zero-point Energies=   | -193.077811 |
| Sum of electronic and thermal Energies=      | -193.072434 |
| Sum of electronic and thermal Enthalpies=    | -193.071490 |
| Sum of electronic and thermal Free Energies= | -193.106114 |

Electronic energy in solution by single point calculation = -193.087806145

|   |           |           |           |
|---|-----------|-----------|-----------|
| 6 | 0.000042  | 0.186677  | 0.000002  |
| 6 | -1.290688 | -0.615457 | 0.000025  |
| 1 | -1.335447 | -1.268900 | 0.880342  |
| 1 | -2.147981 | 0.060318  | 0.001010  |
| 1 | -1.336137 | -1.267155 | -0.881580 |
| 6 | 1.290677  | -0.615400 | -0.000004 |
| 1 | 1.335402  | -1.268578 | -0.880550 |
| 1 | 2.148121  | 0.060198  | -0.000711 |
| 1 | 1.336113  | -1.267482 | 0.881322  |
| 8 | -0.000032 | 1.402085  | 0.000003  |

### Al(O<sup>i</sup>Pr)<sub>3</sub>

SCF Energy: -823.918543265

|                                              |              |
|----------------------------------------------|--------------|
| Sum of electronic and zero-point Energies=   | -823.6201493 |
| Sum of electronic and thermal Energies=      | -823.6017563 |
| Sum of electronic and thermal Enthalpies=    | -823.6008113 |
| Sum of electronic and thermal Free Energies= | -823.6699803 |

Electronic energy in solution by single point calculation = -823.637529896

|    |           |           |           |
|----|-----------|-----------|-----------|
| 13 | -0.282970 | -0.408079 | 0.165138  |
| 8  | -0.539685 | 1.235331  | -0.212286 |
| 8  | -1.637298 | -1.433251 | 0.218213  |
| 8  | 1.218268  | -1.118715 | 0.519831  |
| 6  | 0.201251  | 2.432084  | -0.041506 |
| 6  | -3.013468 | -1.126842 | 0.019816  |
| 6  | 2.545409  | -0.915862 | 0.066277  |
| 6  | -3.247229 | -0.611870 | -1.400523 |
| 1  | -2.870242 | -1.335340 | -2.131510 |
| 1  | -4.314682 | -0.452747 | -1.592892 |
| 1  | -2.724421 | 0.340806  | -1.547094 |
| 6  | -3.504663 | -0.140062 | 1.079231  |
| 1  | -3.309492 | -0.533701 | 2.082635  |
| 1  | -2.984084 | 0.818670  | 0.969967  |
| 1  | -4.581832 | 0.039485  | 0.983348  |
| 6  | 0.828844  | 2.489237  | 1.351402  |
| 1  | 1.561897  | 1.682246  | 1.476510  |
| 1  | 1.342052  | 3.442949  | 1.518904  |
| 1  | 0.056285  | 2.375501  | 2.119845  |

|   |           |           |           |
|---|-----------|-----------|-----------|
| 6 | 1.237492  | 2.585183  | -1.153723 |
| 1 | 2.008257  | 1.809785  | -1.075282 |
| 1 | 0.756142  | 2.495012  | -2.132691 |
| 1 | 1.731844  | 3.561907  | -1.098683 |
| 6 | 2.630639  | -1.175434 | -1.437776 |
| 1 | 2.323304  | -2.204267 | -1.656408 |
| 1 | 1.970292  | -0.493735 | -1.988517 |
| 1 | 3.650644  | -1.029210 | -1.811274 |
| 6 | 3.468426  | -1.834416 | 0.861376  |
| 1 | 3.199381  | -2.881410 | 0.683597  |
| 1 | 4.514706  | -1.685884 | 0.571020  |
| 1 | 3.370590  | -1.633705 | 1.932736  |
| 1 | -3.555748 | -2.074300 | 0.144151  |
| 1 | -0.520562 | 3.256625  | -0.129460 |
| 1 | 2.843787  | 0.127307  | 0.260808  |

### HCN

SCF Energy: -93.397465

|                                              |            |
|----------------------------------------------|------------|
| Sum of electronic and zero-point Energies=   | -93.383042 |
| Sum of electronic and thermal Energies=      | -93.380054 |
| Sum of electronic and thermal Enthalpies=    | -93.379109 |
| Sum of electronic and thermal Free Energies= | -93.397488 |

Electronic energy in solution by single point calculation = -93.3691551096

|   |           |           |           |
|---|-----------|-----------|-----------|
| 1 | 0.000920  | 1.449272  | 0.000000  |
| 6 | -0.000071 | -0.748452 | -0.000000 |
| 7 | -0.000071 | 0.434492  | 0.000000  |

### IM10B

SCF Energy: -3696.133351

|                                              |              |
|----------------------------------------------|--------------|
| Sum of electronic and zero-point Energies=   | -3695.042054 |
| Sum of electronic and thermal Energies=      | -3694.973198 |
| Sum of electronic and thermal Enthalpies=    | -3694.972254 |
| Sum of electronic and thermal Free Energies= | -3695.151032 |

Electronic energy in solution by single point calculation = -3694.48634545

|   |           |           |           |
|---|-----------|-----------|-----------|
| 6 | -3.524613 | -3.364614 | 1.480652  |
| 6 | -2.988160 | -2.322348 | 0.708886  |
| 6 | -2.735581 | -2.596366 | -0.638296 |
| 6 | -2.911445 | -3.851215 | -1.229965 |
| 6 | -3.414061 | -4.869983 | -0.417471 |
| 6 | -3.735335 | -4.622364 | 0.918733  |
| 6 | -2.597929 | -3.991583 | -2.724850 |
| 6 | -1.409536 | -3.077907 | -3.037967 |
| 6 | -1.344816 | -1.860761 | -2.364891 |

|    |           |           |           |
|----|-----------|-----------|-----------|
| 6  | -0.365006 | -0.892520 | -2.583595 |
| 6  | 0.605612  | -1.156499 | -3.555283 |
| 6  | 0.580770  | -2.370813 | -4.244243 |
| 6  | -0.410535 | -3.321786 | -3.987391 |
| 1  | -3.755464 | -3.200078 | 2.525422  |
| 1  | -3.565627 | -5.863288 | -0.824907 |
| 1  | -4.142026 | -5.421191 | 1.531291  |
| 1  | 1.386130  | -0.430025 | -3.750845 |
| 1  | 1.346448  | -2.581288 | -4.984214 |
| 1  | -0.401457 | -4.257026 | -4.536212 |
| 8  | -2.282923 | -1.546515 | -1.401489 |
| 15 | -0.407202 | 0.545414  | -1.456419 |
| 15 | -2.490577 | -0.690002 | 1.425820  |
| 6  | 0.924251  | 1.632572  | -2.099104 |
| 6  | 0.639755  | 2.808597  | -2.810837 |
| 6  | 2.264642  | 1.279758  | -1.876986 |
| 6  | 1.678656  | 3.613734  | -3.278927 |
| 1  | -0.386321 | 3.102998  | -2.993036 |
| 6  | 3.300980  | 2.085868  | -2.347175 |
| 1  | 2.528316  | 0.379329  | -1.341483 |
| 6  | 3.008937  | 3.260253  | -3.043363 |
| 1  | 1.443181  | 4.522381  | -3.826706 |
| 1  | 4.318064  | 1.769677  | -2.143654 |
| 1  | 3.813559  | 3.895259  | -3.403695 |
| 6  | -1.918763 | 1.461182  | -1.930530 |
| 6  | -2.287993 | 2.551489  | -1.130828 |
| 6  | -2.654218 | 1.173244  | -3.085890 |
| 6  | -3.359391 | 3.360553  | -1.499311 |
| 1  | -1.725046 | 2.780728  | -0.233257 |
| 6  | -3.743057 | 1.971265  | -3.438746 |
| 1  | -2.369261 | 0.337125  | -3.716084 |
| 6  | -4.091514 | 3.069966  | -2.651841 |
| 1  | -3.621145 | 4.209239  | -0.876956 |
| 1  | -4.310783 | 1.740602  | -4.336088 |
| 1  | -4.933780 | 3.695634  | -2.933835 |
| 6  | -2.756732 | -1.060713 | 3.209536  |
| 6  | -1.773506 | -1.829373 | 3.855528  |
| 6  | -3.907644 | -0.695945 | 3.917965  |
| 6  | -1.936850 | -2.218179 | 5.182859  |
| 1  | -0.880436 | -2.120271 | 3.308848  |
| 6  | -4.063665 | -1.076498 | 5.253199  |
| 1  | -4.688265 | -0.123745 | 3.429815  |
| 6  | -3.081318 | -1.836078 | 5.887939  |

|    |           |           |           |
|----|-----------|-----------|-----------|
| 1  | -1.167613 | -2.811579 | 5.668275  |
| 1  | -4.959595 | -0.782798 | 5.792829  |
| 1  | -3.205434 | -2.130665 | 6.925977  |
| 6  | -3.869769 | 0.445246  | 1.011423  |
| 6  | -3.966538 | 1.661570  | 1.706910  |
| 6  | -4.790629 | 0.169379  | -0.004905 |
| 6  | -4.984774 | 2.565223  | 1.416410  |
| 1  | -3.255828 | 1.891756  | 2.494434  |
| 6  | -5.797761 | 1.085908  | -0.308553 |
| 1  | -4.724411 | -0.759232 | -0.559779 |
| 6  | -5.904515 | 2.278551  | 0.405586  |
| 1  | -5.053245 | 3.496369  | 1.971761  |
| 1  | -6.499820 | 0.864381  | -1.106839 |
| 1  | -6.693278 | 2.986845  | 0.169266  |
| 46 | -0.256237 | 0.000043  | 0.902535  |
| 6  | -3.823584 | -3.472347 | -3.524533 |
| 1  | -3.623925 | -3.527564 | -4.600257 |
| 1  | -4.708147 | -4.078012 | -3.298726 |
| 1  | -4.044827 | -2.431192 | -3.270113 |
| 6  | -2.319658 | -5.447726 | -3.118455 |
| 1  | -3.192327 | -6.077047 | -2.921303 |
| 1  | -2.113582 | -5.522843 | -4.190011 |
| 1  | -1.464251 | -5.855380 | -2.570573 |
| 1  | 1.259609  | 0.396857  | 3.126718  |
| 6  | 1.664181  | -0.567642 | 0.813520  |
| 7  | 2.804927  | -0.810789 | 0.800915  |
| 13 | 4.719406  | -0.672148 | 0.578876  |
| 8  | 4.967749  | -0.282894 | -1.108242 |
| 8  | 5.010645  | 0.684028  | 1.635976  |
| 8  | 5.354975  | -2.240559 | 0.998005  |
| 6  | 5.162434  | -1.161235 | -2.195986 |
| 6  | 6.092488  | 1.586328  | 1.630887  |
| 6  | 5.078546  | -2.958626 | 2.178603  |
| 6  | 5.932072  | 2.620222  | 0.510444  |
| 1  | 4.959506  | 3.117752  | 0.588486  |
| 1  | 6.719206  | 3.383909  | 0.554581  |
| 1  | 5.981648  | 2.117564  | -0.461199 |
| 6  | 7.435614  | 0.856302  | 1.515924  |
| 1  | 7.533325  | 0.107265  | 2.307817  |
| 1  | 7.502487  | 0.340799  | 0.549156  |
| 1  | 8.278513  | 1.555302  | 1.587723  |
| 6  | 6.578377  | -1.743384 | -2.165098 |
| 1  | 6.703530  | -2.354182 | -1.264544 |

|   |           |           |           |
|---|-----------|-----------|-----------|
| 1 | 6.777020  | -2.365544 | -3.047295 |
| 1 | 7.315079  | -0.932744 | -2.139122 |
| 6 | 4.102963  | -2.269754 | -2.228288 |
| 1 | 4.198265  | -2.902400 | -1.338873 |
| 1 | 3.094240  | -1.843603 | -2.241814 |
| 1 | 4.219032  | -2.901716 | -3.118126 |
| 6 | 5.860120  | -2.381075 | 3.363603  |
| 1 | 6.936760  | -2.447529 | 3.164886  |
| 1 | 5.605710  | -1.325751 | 3.505194  |
| 1 | 5.642752  | -2.925462 | 4.291682  |
| 6 | 5.415734  | -4.431248 | 1.942021  |
| 1 | 6.481018  | -4.534020 | 1.703228  |
| 1 | 5.195007  | -5.041864 | 2.826410  |
| 1 | 4.839288  | -4.818822 | 1.095114  |
| 1 | 6.076280  | 2.120422  | 2.595249  |
| 1 | 5.052723  | -0.560953 | -3.115568 |
| 1 | 4.000233  | -2.891290 | 2.416858  |
| 6 | -0.131281 | 1.943609  | 2.475414  |
| 6 | 0.215573  | 0.612296  | 2.923268  |
| 6 | 0.676539  | 2.825941  | 1.795537  |
| 1 | -1.179825 | 2.209661  | 2.572763  |
| 1 | -0.455946 | 0.168172  | 3.649351  |
| 6 | 0.081469  | 4.029916  | 1.181490  |
| 6 | 0.665686  | 4.591112  | 0.030711  |
| 6 | -1.106609 | 4.615504  | 1.666318  |
| 6 | 0.059493  | 5.653178  | -0.636904 |
| 1 | 1.576874  | 4.166711  | -0.372303 |
| 6 | -1.704039 | 5.683761  | 1.005145  |
| 1 | -1.554256 | 4.243193  | 2.582167  |
| 6 | -1.130419 | 6.202251  | -0.160029 |
| 1 | 0.519251  | 6.043017  | -1.540243 |
| 1 | -2.614907 | 6.121170  | 1.405443  |
| 1 | -1.600743 | 7.031623  | -0.680273 |
| 6 | 2.150708  | 2.596532  | 1.599586  |
| 1 | 2.382865  | 2.299556  | 0.570656  |
| 1 | 2.707026  | 3.520347  | 1.795645  |
| 1 | 2.555748  | 1.814890  | 2.240335  |

## IM10

SCF Energy: -2275.44282991

|                                            |              |
|--------------------------------------------|--------------|
| Sum of electronic and zero-point Energies= | -2274.485648 |
| Sum of electronic and thermal Energies=    | -2274.431331 |
| Sum of electronic and thermal Enthalpies=  | -2274.430387 |

Sum of electronic and thermal Free Energies= -2274.573628

Electronic energy in solution by single point calculation = -2274.26028085

|    |           |           |           |
|----|-----------|-----------|-----------|
| 46 | -0.276255 | -0.902893 | 0.460293  |
| 15 | 1.633993  | -1.728755 | -0.472146 |
| 6  | 3.227423  | -0.772970 | -0.423427 |
| 6  | 3.336860  | 0.593560  | -0.059618 |
| 6  | 4.411587  | -1.465443 | -0.747710 |
| 6  | 4.625133  | 1.152452  | 0.048777  |
| 6  | 2.230261  | 1.592182  | 0.138639  |
| 6  | 5.671294  | -0.882083 | -0.666403 |
| 1  | 4.352762  | -2.492504 | -1.071996 |
| 6  | 5.782139  | 0.438042  | -0.238067 |
| 1  | 4.697701  | 2.192802  | 0.348300  |
| 6  | 1.946502  | 2.485797  | -0.921125 |
| 6  | 1.637452  | 1.799176  | 1.400178  |
| 1  | 6.552903  | -1.459685 | -0.928427 |
| 1  | 6.754118  | 0.913762  | -0.145541 |
| 6  | 1.088271  | 3.562387  | -0.688438 |
| 6  | 0.750059  | 2.869271  | 1.570919  |
| 6  | 0.472162  | 3.778541  | 0.547846  |
| 1  | 0.901208  | 4.261576  | -1.497569 |
| 1  | 0.291992  | 3.003012  | 2.542283  |
| 6  | 1.923185  | -3.222951 | 0.721608  |
| 6  | 1.472169  | -2.359531 | -2.275354 |
| 6  | 2.379011  | -3.533865 | -2.680876 |
| 1  | 2.181567  | -3.772187 | -3.733862 |
| 1  | 3.442156  | -3.296835 | -2.603242 |
| 1  | 2.175417  | -4.437492 | -2.102232 |
| 6  | 0.010119  | -2.796852 | -2.505245 |
| 1  | -0.241691 | -3.694763 | -1.937367 |
| 1  | -0.704674 | -2.023919 | -2.224374 |
| 1  | -0.126032 | -3.027246 | -3.569662 |
| 6  | 1.865289  | -2.659134 | 2.155888  |
| 1  | 0.923954  | -2.145495 | 2.375981  |
| 1  | 1.961427  | -3.491338 | 2.864988  |
| 1  | 2.689925  | -1.966323 | 2.344358  |
| 6  | 0.751624  | -4.206506 | 0.537370  |
| 1  | -0.215152 | -3.696146 | 0.568007  |
| 1  | 0.821080  | -4.761857 | -0.401740 |
| 1  | 0.772233  | -4.938369 | 1.354332  |
| 6  | 2.573184  | 2.338134  | -2.303823 |
| 1  | 3.015149  | 1.340455  | -2.369611 |
| 6  | 2.046540  | 0.963820  | 2.603420  |

|   |           |           |           |
|---|-----------|-----------|-----------|
| 1 | 2.410428  | 0.008079  | 2.221258  |
| 6 | -0.408953 | 5.010769  | 0.745705  |
| 1 | 0.247696  | 5.882281  | 0.598048  |
| 6 | 3.705175  | 3.359781  | -2.515339 |
| 1 | 4.143473  | 3.249227  | -3.514388 |
| 1 | 3.324426  | 4.383629  | -2.423799 |
| 1 | 4.502799  | 3.230111  | -1.778289 |
| 6 | 1.535298  | 2.462113  | -3.433620 |
| 1 | 1.984661  | 2.180070  | -4.392660 |
| 1 | 0.666205  | 1.821305  | -3.257554 |
| 1 | 1.169876  | 3.489978  | -3.533660 |
| 6 | -1.008699 | 5.124347  | 2.151902  |
| 1 | -0.234770 | 5.156174  | 2.926015  |
| 1 | -1.600333 | 6.042305  | 2.233223  |
| 1 | -1.673681 | 4.280163  | 2.369746  |
| 6 | -1.525833 | 5.108200  | -0.311415 |
| 1 | -1.133850 | 5.056784  | -1.331630 |
| 1 | -2.249377 | 4.296918  | -0.190715 |
| 1 | -2.062030 | 6.058177  | -0.206514 |
| 6 | 0.905584  | 0.671828  | 3.587868  |
| 1 | 1.251000  | -0.044721 | 4.343028  |
| 1 | 0.598893  | 1.576832  | 4.125774  |
| 1 | 0.024924  | 0.249875  | 3.095829  |
| 6 | 3.222228  | 1.641408  | 3.334786  |
| 1 | 2.922920  | 2.627519  | 3.708951  |
| 1 | 3.540410  | 1.035427  | 4.191556  |
| 1 | 4.084747  | 1.777274  | 2.675127  |
| 6 | 3.244131  | -4.002037 | 0.603148  |
| 1 | 3.424591  | -4.407014 | -0.394110 |
| 1 | 4.102405  | -3.394538 | 0.897379  |
| 1 | 3.195689  | -4.852772 | 1.294829  |
| 6 | 1.795676  | -1.162530 | -3.187061 |
| 1 | 2.854706  | -0.895383 | -3.137506 |
| 1 | 1.558792  | -1.424503 | -4.225691 |
| 1 | 1.214791  | -0.277115 | -2.926247 |
| 6 | -2.664179 | 1.549562  | 0.282465  |
| 6 | -0.820725 | 0.412754  | -1.039250 |
| 1 | -3.546021 | 2.140524  | 0.017092  |
| 1 | -1.837993 | 2.223789  | 0.517101  |
| 1 | -0.577641 | -0.000869 | -2.015598 |
| 1 | -0.199306 | 1.273046  | -0.804504 |
| 6 | -2.258279 | 0.627387  | -0.839754 |
| 6 | -3.127638 | 0.009749  | -1.689540 |

|   |           |           |           |
|---|-----------|-----------|-----------|
| 6 | -4.586837 | 0.010054  | -1.701509 |
| 6 | -5.383104 | 0.233180  | -0.559175 |
| 6 | -5.242695 | -0.280870 | -2.916330 |
| 6 | -6.772892 | 0.191170  | -0.643393 |
| 1 | -4.926606 | 0.394947  | 0.407252  |
| 6 | -6.630330 | -0.310989 | -2.999632 |
| 1 | -4.643409 | -0.474061 | -3.803136 |
| 6 | -7.404227 | -0.070339 | -1.860703 |
| 1 | -7.360293 | 0.352030  | 0.255989  |
| 1 | -7.110330 | -0.527662 | -3.950158 |
| 1 | -8.488587 | -0.100449 | -1.920452 |
| 1 | -2.678843 | -0.563678 | -2.501536 |
| 6 | -2.689607 | -1.758211 | 2.252463  |
| 6 | -3.128134 | -2.556728 | 1.007044  |
| 1 | -4.041807 | -3.131326 | 1.196757  |
| 1 | -3.303445 | -1.883412 | 0.166358  |
| 1 | -2.325016 | -3.249805 | 0.736176  |
| 6 | -2.406403 | -2.717624 | 3.428142  |
| 1 | -1.583052 | -3.378709 | 3.136724  |
| 1 | -2.099539 | -2.144945 | 4.307430  |
| 1 | -3.281927 | -3.325737 | 3.682579  |
| 8 | -1.578458 | -0.953339 | 2.041213  |
| 1 | -2.883740 | 0.999200  | 1.200204  |
| 6 | -3.842689 | -0.881460 | 2.644521  |
| 7 | -4.720740 | -0.171224 | 2.919259  |

## IM11

SCF Energy: -2712.35901364

|                                              |              |
|----------------------------------------------|--------------|
| Sum of electronic and zero-point Energies=   | -2711.269923 |
| Sum of electronic and thermal Energies=      | -2711.207165 |
| Sum of electronic and thermal Enthalpies=    | -2711.206221 |
| Sum of electronic and thermal Free Energies= | -2711.365279 |

Electronic energy in solution by single point calculation = -2711.14436871

|    |           |           |           |
|----|-----------|-----------|-----------|
| 46 | 0.655657  | -0.656478 | -0.089749 |
| 6  | -1.320211 | -3.492754 | -0.093631 |
| 6  | -0.298758 | -4.454544 | 0.495578  |
| 1  | 0.639485  | -4.428322 | -0.057664 |
| 1  | -0.112461 | -4.203004 | 1.543200  |
| 1  | -0.711332 | -5.466886 | 0.454754  |
| 6  | -1.602383 | -3.790202 | -1.580290 |
| 1  | -1.947121 | -4.825304 | -1.668716 |
| 1  | -2.387673 | -3.123873 | -1.949823 |
| 1  | -0.707072 | -3.657446 | -2.197428 |

|    |           |           |           |
|----|-----------|-----------|-----------|
| 8  | -2.482859 | -3.624532 | 0.683630  |
| 1  | -3.148921 | -2.938736 | 0.392802  |
| 6  | -0.848516 | -2.032723 | -0.049453 |
| 7  | -1.433121 | -0.959094 | -0.073054 |
| 13 | -3.176773 | -0.147708 | 0.121938  |
| 8  | -3.525817 | 0.879400  | -1.234098 |
| 8  | -4.135160 | -1.640687 | 0.064434  |
| 8  | -3.112081 | 0.668018  | 1.656497  |
| 6  | -4.288671 | 0.530866  | -2.370423 |
| 6  | -5.398892 | -1.895865 | 0.668220  |
| 6  | -2.371835 | 0.259611  | 2.789827  |
| 6  | -6.093884 | -2.998207 | -0.128056 |
| 1  | -5.454946 | -3.886340 | -0.180907 |
| 1  | -7.046196 | -3.282122 | 0.335026  |
| 1  | -6.290764 | -2.655949 | -1.150982 |
| 6  | -6.243416 | -0.624177 | 0.757147  |
| 1  | -5.724780 | 0.139253  | 1.347355  |
| 1  | -6.436837 | -0.221505 | -0.244218 |
| 1  | -7.208009 | -0.830318 | 1.236095  |
| 6  | -5.236761 | 1.682698  | -2.703755 |
| 1  | -4.662670 | 2.591701  | -2.921245 |
| 1  | -5.861051 | 1.449264  | -3.574836 |
| 1  | -5.890498 | 1.891974  | -1.850473 |
| 6  | -3.357503 | 0.203679  | -3.539789 |
| 1  | -2.759073 | 1.084776  | -3.801131 |
| 1  | -2.669898 | -0.603277 | -3.263005 |
| 1  | -3.921018 | -0.106354 | -4.428387 |
| 6  | -2.794259 | -1.132059 | 3.273852  |
| 1  | -3.861358 | -1.128302 | 3.527471  |
| 1  | -2.628152 | -1.896800 | 2.509391  |
| 1  | -2.230425 | -1.421711 | 4.169952  |
| 6  | -2.555330 | 1.298060  | 3.896398  |
| 1  | -3.613809 | 1.361692  | 4.174833  |
| 1  | -1.974786 | 1.033289  | 4.788044  |
| 1  | -2.236512 | 2.287085  | 3.555631  |
| 1  | -5.223597 | -2.262391 | 1.692375  |
| 1  | -4.892819 | -0.365678 | -2.158831 |
| 1  | -1.300832 | 0.220647  | 2.527008  |
| 15 | 2.913949  | -1.177663 | 0.000317  |
| 6  | 3.806452  | 0.434983  | -0.147754 |
| 6  | 3.067148  | 1.637273  | -0.225396 |
| 6  | 5.208089  | 0.497428  | -0.253203 |
| 6  | 3.763191  | 2.843240  | -0.425877 |

|   |           |           |           |
|---|-----------|-----------|-----------|
| 6 | 1.568557  | 1.780895  | -0.123264 |
| 6 | 5.879309  | 1.701353  | -0.441657 |
| 1 | 5.789589  | -0.411530 | -0.187131 |
| 6 | 5.149043  | 2.885472  | -0.534681 |
| 1 | 3.187469  | 3.760374  | -0.500540 |
| 6 | 0.778925  | 1.787951  | -1.312604 |
| 6 | 1.006396  | 2.310030  | 1.075340  |
| 1 | 6.962503  | 1.711524  | -0.520062 |
| 1 | 5.653168  | 3.834650  | -0.691478 |
| 6 | -0.516306 | 2.319049  | -1.267927 |
| 6 | -0.283026 | 2.846217  | 1.050550  |
| 6 | -1.048983 | 2.903077  | -0.117889 |
| 1 | -1.113623 | 2.325941  | -2.173331 |
| 1 | -0.685331 | 3.269730  | 1.963045  |
| 6 | 3.451014  | -1.894918 | 1.687254  |
| 6 | 3.599922  | -2.265800 | -1.424949 |
| 6 | 4.994488  | -2.878669 | -1.211709 |
| 1 | 5.239326  | -3.495078 | -2.086118 |
| 1 | 5.778982  | -2.123733 | -1.125918 |
| 1 | 5.040337  | -3.528625 | -0.335786 |
| 6 | 2.594532  | -3.408653 | -1.657049 |
| 1 | 2.574879  | -4.115557 | -0.825510 |
| 1 | 1.583687  | -3.018137 | -1.799668 |
| 1 | 2.883518  | -3.964641 | -2.557971 |
| 6 | 2.646217  | -1.117014 | 2.741545  |
| 1 | 1.569891  | -1.193970 | 2.561391  |
| 1 | 2.863083  | -1.523138 | 3.737791  |
| 1 | 2.916913  | -0.060011 | 2.747134  |
| 6 | 3.036557  | -3.372138 | 1.769222  |
| 1 | 1.981535  | -3.500941 | 1.523270  |
| 1 | 3.628574  | -4.016360 | 1.114350  |
| 1 | 3.186039  | -3.725594 | 2.797096  |
| 6 | 1.377310  | 1.430792  | -2.667148 |
| 1 | 2.345160  | 0.960229  | -2.487907 |
| 6 | 1.824021  | 2.430024  | 2.355174  |
| 1 | 2.742767  | 1.851617  | 2.221081  |
| 6 | -2.361800 | 3.662630  | -0.224897 |
| 1 | -3.025146 | 3.037268  | -0.830359 |
| 6 | 1.642923  | 2.709585  | -3.482683 |
| 1 | 2.114642  | 2.462613  | -4.441125 |
| 1 | 0.708759  | 3.243324  | -3.690104 |
| 1 | 2.307477  | 3.390760  | -2.940996 |
| 6 | 0.508219  | 0.445215  | -3.460834 |

|   |           |           |           |
|---|-----------|-----------|-----------|
| 1 | 1.007041  | 0.164411  | -4.396186 |
| 1 | 0.315570  | -0.462268 | -2.878158 |
| 1 | -0.461274 | 0.879870  | -3.719326 |
| 6 | -2.114500 | 4.985872  | -0.977935 |
| 1 | -1.660927 | 4.813788  | -1.960362 |
| 1 | -3.058698 | 5.522618  | -1.127609 |
| 1 | -1.440654 | 5.637948  | -0.407586 |
| 6 | -3.063574 | 3.923341  | 1.109610  |
| 1 | -3.270938 | 2.980540  | 1.619733  |
| 1 | -2.468608 | 4.570735  | 1.767736  |
| 1 | -4.015018 | 4.436668  | 0.928995  |
| 6 | 1.083209  | 1.875236  | 3.581928  |
| 1 | 1.749834  | 1.860166  | 4.452095  |
| 1 | 0.218542  | 2.494108  | 3.839902  |
| 1 | 0.719684  | 0.860146  | 3.406017  |
| 6 | 2.242477  | 3.891105  | 2.606015  |
| 1 | 1.361692  | 4.532770  | 2.720228  |
| 1 | 2.838483  | 3.966465  | 3.523183  |
| 1 | 2.841035  | 4.283702  | 1.778778  |
| 6 | 4.942739  | -1.748667 | 2.027424  |
| 1 | 5.597319  | -2.257177 | 1.316630  |
| 1 | 5.241552  | -0.699059 | 2.084459  |
| 1 | 5.120481  | -2.196031 | 3.013625  |
| 6 | 3.627357  | -1.409859 | -2.702723 |
| 1 | 4.301287  | -0.553364 | -2.618626 |
| 1 | 3.973463  | -2.032620 | -3.537131 |
| 1 | 2.629896  | -1.046870 | -2.954726 |

## IM12

SCF Energy: -2712.35363911

|                                              |              |
|----------------------------------------------|--------------|
| Sum of electronic and zero-point Energies=   | -2711.269251 |
| Sum of electronic and thermal Energies=      | -2711.204119 |
| Sum of electronic and thermal Enthalpies=    | -2711.203175 |
| Sum of electronic and thermal Free Energies= | -2711.371747 |

Electronic energy in solution by single point calculation = -2711.149095

|    |           |           |           |
|----|-----------|-----------|-----------|
| 46 | 0.876975  | -0.812802 | 0.186531  |
| 6  | -1.891306 | -3.541275 | -0.205485 |
| 6  | -0.689758 | -4.138512 | 0.451079  |
| 1  | -0.001004 | -3.283854 | 0.617697  |
| 1  | -0.949602 | -4.594364 | 1.408103  |
| 1  | -0.170634 | -4.847308 | -0.201081 |
| 6  | -1.735503 | -3.080018 | -1.628282 |
| 1  | -1.441042 | -3.918115 | -2.270520 |

|    |           |           |           |
|----|-----------|-----------|-----------|
| 1  | -2.651905 | -2.621771 | -2.005374 |
| 1  | -0.919687 | -2.343021 | -1.651495 |
| 8  | -2.931307 | -3.359163 | 0.435786  |
| 1  | -3.938100 | -2.245383 | -0.046305 |
| 6  | -1.038328 | -0.439629 | 0.290934  |
| 7  | -2.188529 | -0.178173 | 0.269174  |
| 13 | -3.988471 | 0.237755  | 0.161547  |
| 8  | -4.447179 | 1.216699  | -1.178432 |
| 8  | -4.603861 | -1.510480 | -0.262945 |
| 8  | -4.653525 | 0.685491  | 1.684464  |
| 6  | -4.431354 | 0.871637  | -2.549911 |
| 6  | -5.958724 | -2.017428 | -0.013209 |
| 6  | -4.104871 | 0.393601  | 2.959152  |
| 6  | -6.178889 | -3.213579 | -0.927528 |
| 1  | -5.419960 | -3.983605 | -0.755255 |
| 1  | -7.162856 | -3.654865 | -0.737347 |
| 1  | -6.133458 | -2.902504 | -1.976862 |
| 6  | -6.949018 | -0.887682 | -0.237075 |
| 1  | -6.772446 | -0.068892 | 0.465787  |
| 1  | -6.876854 | -0.503364 | -1.259100 |
| 1  | -7.964522 | -1.265491 | -0.077845 |
| 6  | -5.432032 | 1.762433  | -3.283145 |
| 1  | -5.143135 | 2.813625  | -3.171302 |
| 1  | -5.472792 | 1.521124  | -4.351993 |
| 1  | -6.433360 | 1.640657  | -2.856712 |
| 6  | -3.019525 | 1.008615  | -3.125801 |
| 1  | -2.690049 | 2.051685  | -3.058166 |
| 1  | -2.307956 | 0.394756  | -2.564772 |
| 1  | -2.989386 | 0.704065  | -4.179204 |
| 6  | -4.301036 | -1.085534 | 3.304344  |
| 1  | -5.370498 | -1.331138 | 3.299916  |
| 1  | -3.791675 | -1.729538 | 2.578441  |
| 1  | -3.899546 | -1.317975 | 4.297882  |
| 6  | -4.760861 | 1.313658  | 3.985146  |
| 1  | -5.841101 | 1.128987  | 4.018047  |
| 1  | -4.346748 | 1.150573  | 4.987094  |
| 1  | -4.602872 | 2.359955  | 3.705585  |
| 1  | -5.982633 | -2.329080 | 1.036483  |
| 1  | -4.749738 | -0.179077 | -2.673592 |
| 1  | -3.021506 | 0.598311  | 2.951560  |
| 15 | 3.143896  | -1.333264 | 0.113227  |
| 6  | 4.188848  | 0.179089  | -0.164801 |
| 6  | 3.621487  | 1.474373  | -0.291034 |

|   |           |           |           |
|---|-----------|-----------|-----------|
| 6 | 5.582334  | 0.047293  | -0.316492 |
| 6 | 4.478442  | 2.556068  | -0.567556 |
| 6 | 2.166464  | 1.847705  | -0.174979 |
| 6 | 6.411719  | 1.131672  | -0.585011 |
| 1 | 6.033818  | -0.930771 | -0.226848 |
| 6 | 5.852760  | 2.401278  | -0.713959 |
| 1 | 4.033703  | 3.540652  | -0.673403 |
| 6 | 1.357334  | 1.899500  | -1.335222 |
| 6 | 1.662338  | 2.358973  | 1.040639  |
| 1 | 7.481921  | 0.981802  | -0.696135 |
| 1 | 6.477975  | 3.263206  | -0.929250 |
| 6 | 0.066154  | 2.419815  | -1.241982 |
| 6 | 0.355958  | 2.860310  | 1.084443  |
| 6 | -0.464774 | 2.894368  | -0.041000 |
| 1 | -0.556963 | 2.444209  | -2.130679 |
| 1 | -0.024362 | 3.233044  | 2.028314  |
| 6 | 3.734122  | -2.045009 | 1.790020  |
| 6 | 3.640074  | -2.542733 | -1.299271 |
| 6 | 4.951988  | -3.326848 | -1.135743 |
| 1 | 5.081729  | -3.978822 | -2.009707 |
| 1 | 5.829740  | -2.678034 | -1.090935 |
| 1 | 4.950568  | -3.968394 | -0.251875 |
| 6 | 2.482860  | -3.552601 | -1.441509 |
| 1 | 2.372697  | -4.184962 | -0.557475 |
| 1 | 1.534839  | -3.030517 | -1.598406 |
| 1 | 2.677377  | -4.206896 | -2.302197 |
| 6 | 3.128382  | -1.119934 | 2.858824  |
| 1 | 2.043343  | -1.039692 | 2.741354  |
| 1 | 3.348854  | -1.520194 | 3.857369  |
| 1 | 3.553146  | -0.115582 | 2.800982  |
| 6 | 3.110780  | -3.440974 | 1.968417  |
| 1 | 2.031257  | -3.412723 | 1.791843  |
| 1 | 3.553512  | -4.189418 | 1.305801  |
| 1 | 3.277084  | -3.777042 | 3.000047  |
| 6 | 1.878124  | 1.458133  | -2.694026 |
| 1 | 2.811922  | 0.915059  | -2.532940 |
| 6 | 2.520910  | 2.440452  | 2.294510  |
| 1 | 3.380929  | 1.779381  | 2.153716  |
| 6 | -1.882708 | 3.442341  | -0.016855 |
| 1 | -2.499879 | 2.772149  | -0.627265 |
| 6 | 2.208506  | 2.678184  | -3.571396 |
| 1 | 2.603178  | 2.362298  | -4.544875 |
| 1 | 1.313008  | 3.285464  | -3.747608 |

|   |           |           |           |
|---|-----------|-----------|-----------|
| 1 | 2.957415  | 3.316124  | -3.089994 |
| 6 | 0.903281  | 0.510185  | -3.410246 |
| 1 | 1.359609  | 0.106991  | -4.322621 |
| 1 | 0.628134  | -0.320839 | -2.750712 |
| 1 | -0.018701 | 1.023722  | -3.702718 |
| 6 | -1.932909 | 4.833494  | -0.675850 |
| 1 | -1.538208 | 4.804433  | -1.697414 |
| 1 | -2.963559 | 5.205087  | -0.717501 |
| 1 | -1.331458 | 5.552418  | -0.105786 |
| 6 | -2.506864 | 3.486371  | 1.382258  |
| 1 | -2.418054 | 2.520700  | 1.888192  |
| 1 | -2.029596 | 4.246631  | 2.013122  |
| 1 | -3.571683 | 3.729479  | 1.312116  |
| 6 | 1.772953  | 1.982874  | 3.557400  |
| 1 | 2.471649  | 1.876592  | 4.395481  |
| 1 | 1.012009  | 2.711437  | 3.858596  |
| 1 | 1.273230  | 1.024112  | 3.395657  |
| 6 | 3.071106  | 3.866047  | 2.485573  |
| 1 | 2.249967  | 4.585251  | 2.587004  |
| 1 | 3.689802  | 3.925333  | 3.389387  |
| 1 | 3.684307  | 4.173122  | 1.632754  |
| 6 | 5.249754  | -2.113583 | 2.032333  |
| 1 | 5.775580  | -2.739182 | 1.308297  |
| 1 | 5.701595  | -1.118433 | 2.023347  |
| 1 | 5.426999  | -2.544610 | 3.026461  |
| 6 | 3.709062  | -1.732635 | -2.604194 |
| 1 | 4.521728  | -1.001504 | -2.596355 |
| 1 | 3.877093  | -2.419067 | -3.444269 |
| 1 | 2.771647  | -1.205514 | -2.787750 |

## IM1A

SCF Energy: -2778.63612588

|                                              |              |
|----------------------------------------------|--------------|
| Sum of electronic and zero-point Energies=   | -2777.868037 |
| Sum of electronic and thermal Energies=      | -2777.821345 |
| Sum of electronic and thermal Enthalpies=    | -2777.820401 |
| Sum of electronic and thermal Free Energies= | -2777.947905 |

Electronic energy in solution by single point calculation = -2777.35576074

|   |          |           |          |
|---|----------|-----------|----------|
| 6 | 3.339728 | -1.265796 | 1.438950 |
| 6 | 2.191472 | -0.517536 | 1.143920 |
| 6 | 1.118309 | -0.629054 | 2.031802 |
| 6 | 1.114782 | -1.451444 | 3.161142 |
| 6 | 2.273366 | -2.188956 | 3.414278 |
| 6 | 3.377421 | -2.090131 | 2.563726 |

|    |           |           |           |
|----|-----------|-----------|-----------|
| 6  | -0.140470 | -1.439346 | 4.040639  |
| 6  | -1.351544 | -1.313939 | 3.110852  |
| 6  | -1.212227 | -0.497973 | 1.988614  |
| 6  | -2.230037 | -0.251883 | 1.065514  |
| 6  | -3.474585 | -0.843060 | 1.311663  |
| 6  | -3.653958 | -1.662974 | 2.426982  |
| 6  | -2.602443 | -1.902901 | 3.314778  |
| 1  | 4.196603  | -1.218736 | 0.777775  |
| 1  | 2.321716  | -2.847144 | 4.274853  |
| 1  | 4.272973  | -2.666536 | 2.776537  |
| 1  | -4.294565 | -0.674875 | 0.622871  |
| 1  | -4.622011 | -2.122000 | 2.605547  |
| 1  | -2.765102 | -2.551124 | 4.169009  |
| 8  | -0.002848 | 0.116316  | 1.738666  |
| 15 | -1.791095 | 0.748504  | -0.418673 |
| 15 | 1.951472  | 0.438208  | -0.422348 |
| 6  | -3.422415 | 0.837379  | -1.269622 |
| 6  | -4.276513 | 1.943326  | -1.171963 |
| 6  | -3.827509 | -0.270944 | -2.030167 |
| 6  | -5.509565 | 1.942352  | -1.827575 |
| 1  | -3.980770 | 2.804954  | -0.583415 |
| 6  | -5.065634 | -0.276460 | -2.669873 |
| 1  | -3.161553 | -1.122012 | -2.116336 |
| 6  | -5.908634 | 0.833749  | -2.574529 |
| 1  | -6.159907 | 2.809403  | -1.749239 |
| 1  | -5.368316 | -1.143388 | -3.251044 |
| 1  | -6.869363 | 0.834657  | -3.081958 |
| 6  | -1.625005 | 2.439065  | 0.277025  |
| 6  | -1.022821 | 3.413204  | -0.530688 |
| 6  | -2.093157 | 2.797479  | 1.547132  |
| 6  | -0.912093 | 4.728368  | -0.085157 |
| 1  | -0.630948 | 3.129318  | -1.503187 |
| 6  | -1.963351 | 4.110981  | 2.000171  |
| 1  | -2.563071 | 2.050732  | 2.179249  |
| 6  | -1.378768 | 5.079206  | 1.182862  |
| 1  | -0.437510 | 5.472285  | -0.716758 |
| 1  | -2.324810 | 4.378170  | 2.989653  |
| 1  | -1.278679 | 6.101963  | 1.535687  |
| 6  | 3.595357  | 0.164480  | -1.215337 |
| 6  | 3.716715  | -0.851571 | -2.171560 |
| 6  | 4.740140  | 0.882950  | -0.836916 |
| 6  | 4.957030  | -1.146375 | -2.740025 |
| 1  | 2.828797  | -1.396817 | -2.469335 |

|    |           |           |           |
|----|-----------|-----------|-----------|
| 6  | 5.977346  | 0.593429  | -1.411346 |
| 1  | 4.662661  | 1.667377  | -0.091263 |
| 6  | 6.089074  | -0.422725 | -2.363726 |
| 1  | 5.035777  | -1.936845 | -3.481428 |
| 1  | 6.855560  | 1.159608  | -1.113024 |
| 1  | 7.053948  | -0.646544 | -2.810357 |
| 6  | 2.110478  | 2.198302  | 0.090607  |
| 6  | 2.363090  | 3.143110  | -0.917609 |
| 6  | 1.958905  | 2.639020  | 1.409141  |
| 6  | 2.493231  | 4.493962  | -0.606652 |
| 1  | 2.475569  | 2.811896  | -1.946697 |
| 6  | 2.068027  | 3.996537  | 1.715779  |
| 1  | 1.760942  | 1.926534  | 2.201060  |
| 6  | 2.344713  | 4.925363  | 0.713857  |
| 1  | 2.704671  | 5.210983  | -1.395442 |
| 1  | 1.939304  | 4.325378  | 2.743098  |
| 1  | 2.436710  | 5.980119  | 0.957367  |
| 46 | 0.013882  | -0.129249 | -1.630101 |
| 6  | -0.090521 | -0.172647 | 4.937404  |
| 1  | -0.988794 | -0.116198 | 5.562270  |
| 1  | 0.790426  | -0.203023 | 5.588214  |
| 1  | -0.039091 | 0.735055  | 4.328929  |
| 6  | -0.227171 | -2.681374 | 4.935321  |
| 1  | 0.631806  | -2.732110 | 5.610902  |
| 1  | -1.121832 | -2.642203 | 5.563518  |
| 1  | -0.258343 | -3.601708 | 4.343671  |
| 6  | 0.519728  | -1.350812 | -3.308236 |
| 6  | -0.860489 | -1.145951 | -3.266438 |
| 6  | -0.355083 | -2.549052 | -2.999829 |
| 1  | 1.273797  | -1.203216 | -4.073858 |
| 1  | -1.600646 | -0.770692 | -3.964609 |
| 6  | -0.552021 | -3.614523 | -4.072434 |
| 1  | -0.524708 | -3.169371 | -5.073437 |
| 1  | 0.232674  | -4.380035 | -4.014610 |
| 1  | -1.515467 | -4.126726 | -3.951976 |
| 6  | -0.408966 | -3.088034 | -1.589863 |
| 6  | -1.639182 | -3.402981 | -0.997700 |
| 6  | 0.756547  | -3.268988 | -0.834568 |
| 6  | -1.708277 | -3.856050 | 0.318890  |
| 1  | -2.552423 | -3.266252 | -1.571761 |
| 6  | 0.696134  | -3.724795 | 0.482110  |
| 1  | 1.714559  | -3.015605 | -1.277628 |
| 6  | -0.538705 | -4.014046 | 1.064386  |

|   |           |           |          |
|---|-----------|-----------|----------|
| 1 | -2.673503 | -4.063879 | 0.770836 |
| 1 | 1.609912  | -3.830843 | 1.058510 |
| 1 | -0.591141 | -4.355933 | 2.094039 |

**IM1B**

SCF Energy: -3502.18515982

|                                              |              |
|----------------------------------------------|--------------|
| Sum of electronic and zero-point Energies=   | -3501.175522 |
| Sum of electronic and thermal Energies=      | -3501.111376 |
| Sum of electronic and thermal Enthalpies=    | -3501.110431 |
| Sum of electronic and thermal Free Energies= | -3501.277099 |

Electronic energy in solution by single point calculation = -3500.71409348

|    |           |           |           |
|----|-----------|-----------|-----------|
| 6  | -2.680286 | 1.995142  | 2.641901  |
| 6  | -2.350973 | 1.118848  | 1.595673  |
| 6  | -2.558797 | -0.247927 | 1.822697  |
| 6  | -3.000257 | -0.772168 | 3.044370  |
| 6  | -3.287840 | 0.135201  | 4.065778  |
| 6  | -3.147493 | 1.508401  | 3.859604  |
| 6  | -3.190339 | -2.290139 | 3.150500  |
| 6  | -2.095391 | -2.952505 | 2.311495  |
| 6  | -1.737574 | -2.324401 | 1.121417  |
| 6  | -0.805815 | -2.838200 | 0.216987  |
| 6  | -0.191499 | -4.053794 | 0.532596  |
| 6  | -0.511711 | -4.703182 | 1.726275  |
| 6  | -1.453772 | -4.161542 | 2.604798  |
| 1  | -2.542428 | 3.061405  | 2.513675  |
| 1  | -3.628188 | -0.224956 | 5.030054  |
| 1  | -3.385413 | 2.201947  | 4.660204  |
| 1  | 0.548164  | -4.471519 | -0.141869 |
| 1  | -0.023015 | -5.639985 | 1.975998  |
| 1  | -1.683924 | -4.688032 | 3.524389  |
| 8  | -2.297362 | -1.106210 | 0.781631  |
| 15 | -0.390048 | -1.765543 | -1.202810 |
| 15 | -1.533419 | 1.716341  | 0.043651  |
| 6  | 0.735432  | -2.796053 | -2.216710 |
| 6  | 0.261820  | -3.728476 | -3.152288 |
| 6  | 2.116782  | -2.630388 | -2.039770 |
| 6  | 1.160833  | -4.487365 | -3.900591 |
| 1  | -0.806125 | -3.854958 | -3.298886 |
| 6  | 3.010514  | -3.399868 | -2.787487 |
| 1  | 2.503152  | -1.935768 | -1.299189 |
| 6  | 2.536810  | -4.323937 | -3.719783 |
| 1  | 0.787290  | -5.205188 | -4.625823 |
| 1  | 4.078380  | -3.270145 | -2.635387 |

|    |           |           |           |
|----|-----------|-----------|-----------|
| 1  | 3.235290  | -4.915182 | -4.305763 |
| 6  | -1.946190 | -1.744695 | -2.176860 |
| 6  | -2.116925 | -0.711817 | -3.108474 |
| 6  | -2.961605 | -2.695872 | -2.017037 |
| 6  | -3.278443 | -0.636131 | -3.874251 |
| 1  | -1.344994 | 0.045927  | -3.211693 |
| 6  | -4.129751 | -2.612569 | -2.776084 |
| 1  | -2.841492 | -3.497060 | -1.294118 |
| 6  | -4.289510 | -1.583589 | -3.705708 |
| 1  | -3.404822 | 0.178688  | -4.579048 |
| 1  | -4.914591 | -3.351836 | -2.640270 |
| 1  | -5.201599 | -1.516099 | -4.292132 |
| 6  | -1.054290 | 3.403696  | 0.608442  |
| 6  | 0.126436  | 3.512550  | 1.365755  |
| 6  | -1.823839 | 4.550762  | 0.369130  |
| 6  | 0.511774  | 4.745087  | 1.891573  |
| 1  | 0.750658  | 2.638923  | 1.535628  |
| 6  | -1.417512 | 5.788181  | 0.875586  |
| 1  | -2.736017 | 4.475976  | -0.213598 |
| 6  | -0.256123 | 5.886360  | 1.643321  |
| 1  | 1.420738  | 4.811258  | 2.482412  |
| 1  | -2.013995 | 6.673248  | 0.673439  |
| 1  | 0.054062  | 6.848426  | 2.040493  |
| 6  | -2.898486 | 2.006343  | -1.136565 |
| 6  | -2.591715 | 2.656073  | -2.344827 |
| 6  | -4.198993 | 1.543690  | -0.911743 |
| 6  | -3.588292 | 2.865949  | -3.294818 |
| 1  | -1.575360 | 2.994102  | -2.532585 |
| 6  | -5.186839 | 1.733374  | -1.879802 |
| 1  | -4.439594 | 1.034664  | 0.015765  |
| 6  | -4.887316 | 2.401565  | -3.066515 |
| 1  | -3.348117 | 3.382095  | -4.220349 |
| 1  | -6.191918 | 1.361863  | -1.701604 |
| 1  | -5.659703 | 2.555018  | -3.814943 |
| 46 | 0.288032  | 0.480517  | -0.682800 |
| 6  | -4.562657 | -2.649796 | 2.519485  |
| 1  | -4.719392 | -3.733707 | 2.549069  |
| 1  | -5.373411 | -2.161462 | 3.071534  |
| 1  | -4.610784 | -2.324376 | 1.475952  |
| 6  | -3.163918 | -2.771042 | 4.606671  |
| 1  | -3.977052 | -2.318059 | 5.181153  |
| 1  | -3.310416 | -3.853861 | 4.655152  |
| 1  | -2.214152 | -2.526330 | 5.092958  |

|    |           |           |           |
|----|-----------|-----------|-----------|
| 6  | 1.919700  | 3.156602  | -1.765143 |
| 6  | 2.489741  | 2.871832  | -3.160904 |
| 1  | 3.471277  | 2.398061  | -3.083499 |
| 1  | 1.817327  | 2.212810  | -3.717458 |
| 1  | 2.580786  | 3.820132  | -3.699436 |
| 6  | 2.858732  | 4.050386  | -0.941306 |
| 1  | 3.025287  | 4.984555  | -1.487206 |
| 1  | 2.414355  | 4.286167  | 0.028289  |
| 1  | 3.815298  | 3.553425  | -0.763959 |
| 8  | 0.663537  | 3.776364  | -1.973835 |
| 1  | 0.271521  | 3.965393  | -1.104280 |
| 6  | 1.793254  | 1.804719  | -1.072603 |
| 7  | 2.554708  | 0.921723  | -0.725967 |
| 13 | 3.460875  | 0.211784  | 0.862819  |
| 8  | 3.635733  | -1.480064 | 0.469710  |
| 8  | 4.901041  | 1.194128  | 0.925174  |
| 8  | 2.386728  | 0.630439  | 2.175747  |
| 6  | 4.535564  | -2.459645 | 0.942040  |
| 6  | 5.766832  | 1.460899  | -0.152330 |
| 6  | 1.183855  | 0.034310  | 2.604344  |
| 6  | 6.490997  | 0.194704  | -0.623594 |
| 1  | 5.767577  | -0.558244 | -0.952597 |
| 1  | 7.171280  | 0.411719  | -1.456646 |
| 1  | 7.075340  | -0.231191 | 0.200663  |
| 6  | 6.751575  | 2.550049  | 0.272809  |
| 1  | 6.208139  | 3.442827  | 0.600701  |
| 1  | 7.356344  | 2.195999  | 1.115701  |
| 1  | 7.423167  | 2.827598  | -0.548884 |
| 6  | 5.125530  | -2.091662 | 2.307109  |
| 1  | 4.331867  | -2.024516 | 3.059653  |
| 1  | 5.851736  | -2.844342 | 2.638005  |
| 1  | 5.633446  | -1.122469 | 2.257226  |
| 6  | 3.830947  | -3.819043 | 0.984773  |
| 1  | 3.006726  | -3.800026 | 1.706451  |
| 1  | 3.416858  | -4.066445 | 0.002643  |
| 1  | 4.529534  | -4.612625 | 1.277335  |
| 6  | 0.665497  | 0.779043  | 3.834876  |
| 1  | 1.385871  | 0.681950  | 4.655734  |
| 1  | 0.534712  | 1.844867  | 3.625475  |
| 1  | -0.299590 | 0.374056  | 4.159342  |
| 6  | 1.336190  | -1.459686 | 2.893747  |
| 1  | 2.079523  | -1.613405 | 3.685462  |
| 1  | 0.384972  | -1.894133 | 3.219618  |

|   |          |           |           |
|---|----------|-----------|-----------|
| 1 | 1.671212 | -1.987980 | 1.999917  |
| 1 | 5.186915 | 1.845137  | -1.013763 |
| 1 | 5.373187 | -2.537096 | 0.227459  |
| 1 | 0.426900 | 0.134831  | 1.799986  |

## IM1

SCF Energy: -1988.81566427

|                                              |              |
|----------------------------------------------|--------------|
| Sum of electronic and zero-point Energies=   | -1987.968249 |
| Sum of electronic and thermal Energies=      | -1987.922348 |
| Sum of electronic and thermal Enthalpies=    | -1987.921404 |
| Sum of electronic and thermal Free Energies= | -1988.043718 |

Electronic energy in solution by single point calculation = -1987.77147542

|    |           |           |           |
|----|-----------|-----------|-----------|
| 46 | -0.106717 | 0.720264  | -0.559410 |
| 15 | 2.158294  | 0.690013  | -0.066720 |
| 6  | 2.509693  | -0.887766 | 0.840853  |
| 6  | 1.460681  | -1.820782 | 1.032625  |
| 6  | 3.766160  | -1.165922 | 1.408039  |
| 6  | 1.720709  | -2.982302 | 1.781339  |
| 6  | 0.047854  | -1.699730 | 0.511073  |
| 6  | 4.004828  | -2.322464 | 2.145098  |
| 1  | 4.576564  | -0.461656 | 1.274680  |
| 6  | 2.971616  | -3.238822 | 2.334389  |
| 1  | 0.910202  | -3.688898 | 1.931316  |
| 6  | -0.965869 | -1.123912 | 1.324661  |
| 6  | -0.335776 | -2.445378 | -0.640548 |
| 1  | 4.988254  | -2.502335 | 2.570063  |
| 1  | 3.135201  | -4.144834 | 2.910910  |
| 6  | -2.312736 | -1.284833 | 0.956384  |
| 6  | -1.688394 | -2.587637 | -0.945834 |
| 6  | -2.696712 | -2.019581 | -0.159802 |
| 1  | -3.079996 | -0.836057 | 1.578615  |
| 1  | -1.965102 | -3.175341 | -1.815552 |
| 6  | 3.311254  | 0.665992  | -1.592857 |
| 6  | 2.719847  | 2.092907  | 1.118903  |
| 6  | 4.228731  | 2.368742  | 1.216441  |
| 1  | 4.389955  | 3.193428  | 1.923185  |
| 1  | 4.788363  | 1.509894  | 1.595858  |
| 1  | 4.665642  | 2.671941  | 0.262759  |
| 6  | 2.002645  | 3.378129  | 0.655699  |
| 1  | 2.343068  | 3.716572  | -0.325518 |
| 1  | 0.922162  | 3.219760  | 0.599378  |
| 1  | 2.204932  | 4.183002  | 1.374748  |
| 6  | 2.657953  | -0.309226 | -2.585239 |

|   |           |           |           |
|---|-----------|-----------|-----------|
| 1 | 1.618541  | -0.035667 | -2.784195 |
| 1 | 3.215014  | -0.298657 | -3.531389 |
| 1 | 2.673251  | -1.331902 | -2.202792 |
| 6 | 3.306289  | 2.065515  | -2.232607 |
| 1 | 2.287773  | 2.436673  | -2.373215 |
| 1 | 3.862212  | 2.799394  | -1.644238 |
| 1 | 3.782762  | 2.008993  | -3.219722 |
| 6 | -0.649923 | -0.509588 | 2.681771  |
| 1 | 0.428292  | -0.343631 | 2.727091  |
| 6 | 0.688900  | -3.166836 | -1.503840 |
| 1 | 1.675772  | -2.773279 | -1.246464 |
| 6 | -4.164620 | -2.250113 | -0.474098 |
| 1 | -4.744252 | -1.579783 | 0.173906  |
| 6 | -1.001264 | -1.504484 | 3.803704  |
| 1 | -0.741610 | -1.085309 | 4.783021  |
| 1 | -2.074030 | -1.729599 | 3.804059  |
| 1 | -0.458123 | -2.447528 | 3.681798  |
| 6 | -1.347250 | 0.838853  | 2.905748  |
| 1 | -1.034325 | 1.271825  | 3.863375  |
| 1 | -1.107297 | 1.543600  | 2.105959  |
| 1 | -2.437368 | 0.742334  | 2.927268  |
| 6 | -4.568583 | -3.695227 | -0.128710 |
| 1 | -4.356381 | -3.921387 | 0.921690  |
| 1 | -5.638245 | -3.856426 | -0.307970 |
| 1 | -4.010992 | -4.411120 | -0.744335 |
| 6 | -4.521059 | -1.920606 | -1.932500 |
| 1 | -4.243479 | -0.893530 | -2.190608 |
| 1 | -4.003553 | -2.589304 | -2.629687 |
| 1 | -5.597838 | -2.037638 | -2.100430 |
| 6 | 0.457961  | -2.930203 | -3.005510 |
| 1 | 1.306455  | -3.310969 | -3.585584 |
| 1 | -0.438819 | -3.451163 | -3.359182 |
| 1 | 0.336036  | -1.866184 | -3.224070 |
| 6 | 0.705235  | -4.675653 | -1.196490 |
| 1 | -0.276409 | -5.121823 | -1.394129 |
| 1 | 1.444094  | -5.188778 | -1.823597 |
| 1 | 0.957825  | -4.866270 | -0.149235 |
| 6 | 4.756616  | 0.200911  | -1.357958 |
| 1 | 5.300558  | 0.829040  | -0.649845 |
| 1 | 4.789839  | -0.831679 | -1.000665 |
| 1 | 5.299540  | 0.236202  | -2.311761 |
| 6 | 2.194650  | 1.755151  | 2.524042  |
| 1 | 2.647734  | 0.846905  | 2.930917  |

|   |           |          |           |
|---|-----------|----------|-----------|
| 1 | 2.430528  | 2.585063 | 3.202475  |
| 1 | 1.111063  | 1.632112 | 2.517845  |
| 6 | -0.442801 | 2.287345 | -3.361544 |
| 6 | -0.488001 | 3.435837 | -2.353494 |
| 1 | -1.193402 | 2.272868 | -4.150823 |
| 1 | 0.534442  | 1.929641 | -3.676604 |
| 1 | -1.268311 | 4.187087 | -2.468730 |
| 1 | 0.458958  | 3.833457 | -1.995775 |
| 6 | -0.891831 | 2.061271 | -1.962698 |
| 6 | -2.004279 | 1.449577 | -1.362037 |
| 1 | -2.473748 | 0.609880 | -1.874464 |
| 6 | -2.801222 | 2.069898 | -0.290981 |
| 6 | -4.030736 | 1.502941 | 0.089753  |
| 6 | -2.374283 | 3.222670 | 0.398819  |
| 6 | -4.785232 | 2.037693 | 1.131846  |
| 1 | -4.390098 | 0.627002 | -0.440487 |
| 6 | -3.130365 | 3.760302 | 1.436342  |
| 1 | -1.431059 | 3.681338 | 0.123394  |
| 6 | -4.337527 | 3.168177 | 1.818804  |
| 1 | -5.729171 | 1.572259 | 1.405220  |
| 1 | -2.772738 | 4.646323 | 1.955214  |
| 1 | -4.923037 | 3.586740 | 2.632425  |

## IM2A

SCF Energy: -2778.62744287

|                                              |              |
|----------------------------------------------|--------------|
| Sum of electronic and zero-point Energies=   | -2777.858986 |
| Sum of electronic and thermal Energies=      | -2777.812463 |
| Sum of electronic and thermal Enthalpies=    | -2777.811519 |
| Sum of electronic and thermal Free Energies= | -2777.937857 |

Electronic energy in solution by single point calculation = -2777.33369837

|   |           |           |           |
|---|-----------|-----------|-----------|
| 6 | -3.428264 | -1.308992 | -1.012358 |
| 6 | -2.191519 | -0.657910 | -0.941945 |
| 6 | -1.112403 | -1.265269 | -1.590948 |
| 6 | -1.187436 | -2.469354 | -2.286026 |
| 6 | -2.441313 | -3.083658 | -2.344979 |
| 6 | -3.548154 | -2.506345 | -1.719081 |
| 6 | 0.091625  | -2.973794 | -2.961453 |
| 6 | 1.278095  | -2.599255 | -2.064227 |
| 6 | 1.220624  | -1.382055 | -1.384051 |
| 6 | 2.246790  | -0.880317 | -0.575943 |
| 6 | 3.416715  | -1.645441 | -0.490707 |
| 6 | 3.509575  | -2.871045 | -1.151952 |
| 6 | 2.448900  | -3.348461 | -1.923746 |

|    |           |           |           |
|----|-----------|-----------|-----------|
| 1  | -4.287348 | -0.898641 | -0.495001 |
| 1  | -2.559624 | -4.024972 | -2.870001 |
| 1  | -4.511378 | -3.005645 | -1.767422 |
| 1  | 4.249970  | -1.290757 | 0.103421  |
| 1  | 4.419231  | -3.458114 | -1.066497 |
| 1  | 2.542421  | -4.307619 | -2.420752 |
| 8  | 0.093689  | -0.599858 | -1.499193 |
| 15 | 1.938794  | 0.700559  | 0.339964  |
| 15 | -1.760242 | 0.801555  | 0.085677  |
| 6  | 3.519476  | 0.931310  | 1.250096  |
| 6  | 4.352933  | 2.038079  | 1.039236  |
| 6  | 3.878048  | -0.008693 | 2.232149  |
| 6  | 5.515843  | 2.202165  | 1.793923  |
| 1  | 4.098075  | 2.772114  | 0.283212  |
| 6  | 5.046233  | 0.151509  | 2.974930  |
| 1  | 3.240154  | -0.867365 | 2.409626  |
| 6  | 5.867524  | 1.260775  | 2.761176  |
| 1  | 6.150548  | 3.066341  | 1.617828  |
| 1  | 5.310217  | -0.588036 | 3.725772  |
| 1  | 6.774683  | 1.389135  | 3.344919  |
| 6  | 2.069138  | 1.956363  | -0.991371 |
| 6  | 1.608444  | 3.250217  | -0.712732 |
| 6  | 2.642509  | 1.687800  | -2.240597 |
| 6  | 1.745915  | 4.265822  | -1.656502 |
| 1  | 1.136835  | 3.454595  | 0.244180  |
| 6  | 2.759608  | 2.700683  | -3.192382 |
| 1  | 3.002564  | 0.689090  | -2.465251 |
| 6  | 2.319388  | 3.992095  | -2.899288 |
| 1  | 1.382002  | 5.263067  | -1.431152 |
| 1  | 3.202467  | 2.482092  | -4.160397 |
| 1  | 2.412918  | 4.780980  | -3.640420 |
| 6  | -3.332408 | 1.371962  | 0.842937  |
| 6  | -3.313094 | 1.751576  | 2.189622  |
| 6  | -4.499077 | 1.581787  | 0.089924  |
| 6  | -4.450746 | 2.297621  | 2.787824  |
| 1  | -2.398241 | 1.616869  | 2.758240  |
| 6  | -5.638553 | 2.112098  | 0.690415  |
| 1  | -4.506207 | 1.351079  | -0.970896 |
| 6  | -5.616976 | 2.467469  | 2.042709  |
| 1  | -4.423116 | 2.586683  | 3.834619  |
| 1  | -6.539332 | 2.262655  | 0.101910  |
| 1  | -6.504803 | 2.886723  | 2.507860  |
| 6  | -1.567091 | 2.176096  | -1.140180 |

|    |           |           |           |
|----|-----------|-----------|-----------|
| 6  | -1.776348 | 3.488171  | -0.684989 |
| 6  | -1.228634 | 1.976470  | -2.483490 |
| 6  | -1.670717 | 4.569413  | -1.556476 |
| 1  | -2.047827 | 3.662985  | 0.351684  |
| 6  | -1.114004 | 3.061883  | -3.352564 |
| 1  | -1.061179 | 0.976795  | -2.862135 |
| 6  | -1.340796 | 4.359426  | -2.896332 |
| 1  | -1.849353 | 5.576060  | -1.188015 |
| 1  | -0.847234 | 2.888016  | -4.391122 |
| 1  | -1.256205 | 5.201256  | -3.577790 |
| 46 | -0.016648 | 0.281810  | 1.644718  |
| 6  | 0.256575  | -2.215027 | -4.306310 |
| 1  | 1.176054  | -2.533574 | -4.809927 |
| 1  | -0.594975 | -2.419733 | -4.964662 |
| 1  | 0.313640  | -1.134523 | -4.142460 |
| 6  | 0.033152  | -4.480659 | -3.238245 |
| 1  | -0.803489 | -4.717865 | -3.902105 |
| 1  | 0.942261  | -4.817263 | -3.745109 |
| 1  | -0.084039 | -5.046116 | -2.310005 |
| 6  | 0.930760  | -0.111940 | 3.407077  |
| 6  | 0.127855  | -1.035856 | 3.926478  |
| 6  | -0.970568 | -1.245916 | 2.907357  |
| 1  | 1.811210  | 0.350403  | 3.849786  |
| 1  | 0.183218  | -1.570124 | 4.885754  |
| 6  | -2.357671 | -1.026670 | 3.487580  |
| 1  | -2.364179 | -0.147662 | 4.137053  |
| 1  | -3.136627 | -0.885235 | 2.733286  |
| 1  | -2.648317 | -1.893889 | 4.105461  |
| 6  | -0.821012 | -2.464187 | 2.056479  |
| 6  | 0.450671  | -3.016554 | 1.781482  |
| 6  | -1.934214 | -3.127220 | 1.501399  |
| 6  | 0.598064  | -4.166723 | 1.015077  |
| 1  | 1.328497  | -2.519934 | 2.176069  |
| 6  | -1.787044 | -4.282273 | 0.735423  |
| 1  | -2.931466 | -2.740363 | 1.674342  |
| 6  | -0.522513 | -4.816748 | 0.490315  |
| 1  | 1.594539  | -4.554416 | 0.822793  |
| 1  | -2.670707 | -4.765877 | 0.328247  |
| 1  | -0.411290 | -5.727917 | -0.091442 |

## IM2B

SCF Energy: -3502.18687082

Sum of electronic and zero-point Energies=

-3501.180520

Sum of electronic and thermal Energies= -3501.114580  
 Sum of electronic and thermal Enthalpies= -3501.113635  
 Sum of electronic and thermal Free Energies= -3501.287592  
 Electronic energy in solution by single point calculation = -3500.72153043

|    |           |           |           |
|----|-----------|-----------|-----------|
| 6  | -1.235963 | 2.881127  | 2.598623  |
| 6  | -1.589502 | 1.875012  | 1.687058  |
| 6  | -2.038622 | 0.662108  | 2.224407  |
| 6  | -2.112746 | 0.398942  | 3.596641  |
| 6  | -1.725640 | 1.419040  | 4.468751  |
| 6  | -1.301947 | 2.653493  | 3.972280  |
| 6  | -2.656760 | -0.968356 | 4.024761  |
| 6  | -2.127349 | -1.999793 | 3.024709  |
| 6  | -2.056790 | -1.611970 | 1.686082  |
| 6  | -1.623548 | -2.449855 | 0.652920  |
| 6  | -1.253709 | -3.755698 | 1.000669  |
| 6  | -1.307691 | -4.175226 | 2.330699  |
| 6  | -1.738588 | -3.306211 | 3.334925  |
| 1  | -0.880357 | 3.835625  | 2.229615  |
| 1  | -1.755963 | 1.257589  | 5.540531  |
| 1  | -1.011756 | 3.440456  | 4.662177  |
| 1  | -0.911413 | -4.436937 | 0.229802  |
| 1  | -1.010792 | -5.187940 | 2.587321  |
| 1  | -1.764983 | -3.651271 | 4.362531  |
| 8  | -2.410729 | -0.323221 | 1.334364  |
| 15 | -1.480377 | -1.728605 | -1.036686 |
| 15 | -1.317040 | 2.013186  | -0.137512 |
| 6  | -0.920546 | -3.203579 | -1.988482 |
| 6  | -1.795037 | -4.159818 | -2.522130 |
| 6  | 0.463048  | -3.379417 | -2.143773 |
| 6  | -1.293280 | -5.274432 | -3.196042 |
| 1  | -2.867157 | -4.032121 | -2.409915 |
| 6  | 0.962896  | -4.502753 | -2.801977 |
| 1  | 1.140364  | -2.626178 | -1.752756 |
| 6  | 0.085236  | -5.451037 | -3.332387 |
| 1  | -1.979912 | -6.007222 | -3.611761 |
| 1  | 2.036554  | -4.630480 | -2.907233 |
| 1  | 0.473282  | -6.321491 | -3.854519 |
| 6  | -3.244792 | -1.555972 | -1.523364 |
| 6  | -3.541735 | -0.662392 | -2.561823 |
| 6  | -4.291956 | -2.243876 | -0.896035 |
| 6  | -4.857496 | -0.475482 | -2.979762 |
| 1  | -2.735806 | -0.096834 | -3.021000 |
| 6  | -5.611502 | -2.044820 | -1.305088 |

|    |           |           |           |
|----|-----------|-----------|-----------|
| 1  | -4.074512 | -2.931722 | -0.084504 |
| 6  | -5.895852 | -1.163751 | -2.349578 |
| 1  | -5.074070 | 0.229757  | -3.775503 |
| 1  | -6.416849 | -2.579310 | -0.807934 |
| 1  | -6.923767 | -1.006021 | -2.664657 |
| 6  | -0.542405 | 3.685714  | -0.232097 |
| 6  | 0.856008  | 3.741541  | -0.290530 |
| 6  | -1.271369 | 4.883951  | -0.207052 |
| 6  | 1.519437  | 4.968942  | -0.309961 |
| 1  | 1.418393  | 2.814154  | -0.338559 |
| 6  | -0.609734 | 6.112103  | -0.240617 |
| 1  | -2.355618 | 4.853575  | -0.161123 |
| 6  | 0.786375  | 6.157129  | -0.288182 |
| 1  | 2.603866  | 4.983278  | -0.363055 |
| 1  | -1.183947 | 7.034759  | -0.226266 |
| 1  | 1.298330  | 7.115441  | -0.313392 |
| 6  | -2.999001 | 2.339260  | -0.808089 |
| 6  | -3.094510 | 2.821198  | -2.124391 |
| 6  | -4.175883 | 2.049938  | -0.108518 |
| 6  | -4.337671 | 3.034565  | -2.714337 |
| 1  | -2.186737 | 3.037536  | -2.682122 |
| 6  | -5.421064 | 2.244789  | -0.708378 |
| 1  | -4.124260 | 1.672943  | 0.906537  |
| 6  | -5.507588 | 2.744120  | -2.007203 |
| 1  | -4.394334 | 3.420803  | -3.728723 |
| 1  | -6.325285 | 2.006852  | -0.155038 |
| 1  | -6.478331 | 2.899753  | -2.469592 |
| 46 | -0.170513 | 0.222574  | -1.098487 |
| 6  | -4.204651 | -0.931512 | 3.910212  |
| 1  | -4.626248 | -1.906034 | 4.180635  |
| 1  | -4.616460 | -0.170549 | 4.582552  |
| 1  | -4.515774 | -0.695160 | 2.888545  |
| 6  | -2.269960 | -1.315252 | 5.467326  |
| 1  | -2.679351 | -0.578655 | 6.164980  |
| 1  | -2.685058 | -2.286154 | 5.753271  |
| 1  | -1.183282 | -1.350799 | 5.595428  |
| 6  | 3.698369  | 2.466964  | -2.545928 |
| 6  | 2.494609  | 3.008054  | -3.261863 |
| 1  | 1.664750  | 2.323932  | -3.023837 |
| 1  | 2.227314  | 3.996938  | -2.886483 |
| 1  | 2.628840  | 3.016362  | -4.347472 |
| 6  | 4.538271  | 1.448652  | -3.271461 |
| 1  | 5.067914  | 1.953114  | -4.091087 |

|    |          |           |           |
|----|----------|-----------|-----------|
| 1  | 5.261479 | 0.976063  | -2.605833 |
| 1  | 3.898062 | 0.680036  | -3.713741 |
| 8  | 3.965647 | 2.840472  | -1.401133 |
| 1  | 4.624572 | 1.766353  | -0.390940 |
| 6  | 1.756026 | 0.048938  | -1.452726 |
| 7  | 2.892478 | -0.205770 | -1.201668 |
| 13 | 4.062758 | -0.615664 | 0.173054  |
| 8  | 5.384960 | -1.662915 | -0.212460 |
| 8  | 4.911473 | 1.068851  | 0.275239  |
| 8  | 3.194128 | -0.961730 | 1.620682  |
| 6  | 5.364489 | -3.081101 | -0.163246 |
| 6  | 6.211666 | 1.390764  | 0.867645  |
| 6  | 1.946362 | -0.439561 | 2.052156  |
| 6  | 7.303483 | 1.134220  | -0.161667 |
| 1  | 7.155098 | 1.755992  | -1.051597 |
| 1  | 8.285539 | 1.374846  | 0.260197  |
| 1  | 7.284637 | 0.080122  | -0.453863 |
| 6  | 6.364358 | 0.565706  | 2.134828  |
| 1  | 5.513045 | 0.718821  | 2.803394  |
| 1  | 6.428292 | -0.497359 | 1.885420  |
| 1  | 7.282669 | 0.859509  | 2.653795  |
| 6  | 5.534529 | -3.565311 | 1.278605  |
| 1  | 4.695876 | -3.215079 | 1.890491  |
| 1  | 5.575838 | -4.660347 | 1.328233  |
| 1  | 6.462080 | -3.166757 | 1.704553  |
| 6  | 4.086906 | -3.641481 | -0.797899 |
| 1  | 3.206816 | -3.357478 | -0.206319 |
| 1  | 3.961402 | -3.247594 | -1.812389 |
| 1  | 4.115343 | -4.736545 | -0.848993 |
| 6  | 2.093460 | 1.017275  | 2.493672  |
| 1  | 2.826833 | 1.092501  | 3.306732  |
| 1  | 2.438258 | 1.642328  | 1.662490  |
| 1  | 1.138409 | 1.420470  | 2.844734  |
| 6  | 1.417062 | -1.322081 | 3.178371  |
| 1  | 2.136202 | -1.345144 | 4.006341  |
| 1  | 0.461632 | -0.940736 | 3.551316  |
| 1  | 1.263150 | -2.345653 | 2.823164  |
| 1  | 6.154305 | 2.455632  | 1.117628  |
| 1  | 6.223504 | -3.431298 | -0.755184 |
| 1  | 1.221002 | -0.468262 | 1.220260  |

## IM2

SCF Energy: -1988.80693068

Sum of electronic and zero-point Energies= -1987.959621  
 Sum of electronic and thermal Energies= -1987.914124  
 Sum of electronic and thermal Enthalpies= -1987.913180  
 Sum of electronic and thermal Free Energies= -1988.035630  
 Electronic energy in solution by single point calculation = -1987.75733699

|    |           |           |           |
|----|-----------|-----------|-----------|
| 46 | -0.267164 | -0.419301 | 1.146788  |
| 15 | -2.325375 | -0.951515 | 0.110568  |
| 6  | -2.587737 | 0.355840  | -1.175911 |
| 6  | -1.599838 | 1.350013  | -1.376784 |
| 6  | -3.763441 | 0.414406  | -1.946172 |
| 6  | -1.828522 | 2.339925  | -2.350131 |
| 6  | -0.301159 | 1.512612  | -0.621156 |
| 6  | -3.974899 | 1.406114  | -2.899074 |
| 1  | -4.529713 | -0.335045 | -1.803264 |
| 6  | -2.995088 | 2.375516  | -3.106999 |
| 1  | -1.067339 | 3.100202  | -2.496565 |
| 6  | -0.269132 | 2.328335  | 0.548684  |
| 6  | 0.931069  | 1.193337  | -1.262768 |
| 1  | -4.896284 | 1.418221  | -3.474062 |
| 1  | -3.139066 | 3.157595  | -3.846850 |
| 6  | 0.963542  | 2.796510  | 1.022256  |
| 6  | 2.125250  | 1.710381  | -0.759474 |
| 6  | 2.166277  | 2.525937  | 0.374088  |
| 1  | 0.977674  | 3.422027  | 1.910539  |
| 1  | 3.049302  | 1.454022  | -1.263915 |
| 6  | -2.235339 | -2.598995 | -0.867396 |
| 6  | -3.898716 | -0.958293 | 1.203306  |
| 6  | -5.159249 | -1.613002 | 0.613698  |
| 1  | -5.957645 | -1.572539 | 1.366047  |
| 1  | -5.528428 | -1.086756 | -0.270129 |
| 1  | -5.013272 | -2.662539 | 0.354010  |
| 6  | -3.517449 | -1.677240 | 2.515031  |
| 1  | -3.302555 | -2.737404 | 2.366591  |
| 1  | -2.635598 | -1.217398 | 2.969678  |
| 1  | -4.354705 | -1.602278 | 3.220961  |
| 6  | -0.813090 | -2.670685 | -1.448552 |
| 1  | -0.048738 | -2.633593 | -0.668159 |
| 1  | -0.697319 | -3.611203 | -2.002902 |
| 1  | -0.627563 | -1.852309 | -2.146012 |
| 6  | -2.414758 | -3.794020 | 0.086018  |
| 1  | -1.743490 | -3.733746 | 0.944438  |
| 1  | -3.437708 | -3.894991 | 0.454481  |
| 1  | -2.172181 | -4.714380 | -0.459937 |

|   |           |           |           |
|---|-----------|-----------|-----------|
| 6 | -1.543035 | 2.853587  | 1.193394  |
| 1 | -2.379560 | 2.284687  | 0.786346  |
| 6 | 0.987886  | 0.339396  | -2.519275 |
| 1 | -0.013511 | -0.066644 | -2.688811 |
| 6 | 3.451959  | 3.145050  | 0.900791  |
| 1 | 3.418568  | 3.061972  | 1.996343  |
| 6 | -1.767702 | 4.326499  | 0.805864  |
| 1 | -2.703371 | 4.699047  | 1.239083  |
| 1 | -0.948931 | 4.957960  | 1.169420  |
| 1 | -1.826004 | 4.441247  | -0.281544 |
| 6 | -1.546512 | 2.673473  | 2.718687  |
| 1 | -2.513880 | 2.975948  | 3.136229  |
| 1 | -1.356549 | 1.627524  | 2.984319  |
| 1 | -0.776124 | 3.285451  | 3.200469  |
| 6 | 3.494331  | 4.645099  | 0.549278  |
| 1 | 2.615420  | 5.171960  | 0.935617  |
| 1 | 4.390188  | 5.117948  | 0.968336  |
| 1 | 3.514639  | 4.780128  | -0.538815 |
| 6 | 4.725715  | 2.443551  | 0.417646  |
| 1 | 4.688199  | 1.365991  | 0.598285  |
| 1 | 4.883752  | 2.596664  | -0.656659 |
| 1 | 5.599636  | 2.851708  | 0.936881  |
| 6 | 1.965504  | -0.836955 | -2.351766 |
| 1 | 1.878814  | -1.528012 | -3.198248 |
| 1 | 3.005992  | -0.498605 | -2.310408 |
| 1 | 1.771909  | -1.389364 | -1.430241 |
| 6 | 1.348096  | 1.183756  | -3.754560 |
| 1 | 2.332659  | 1.650233  | -3.635971 |
| 1 | 1.379593  | 0.554001  | -4.651265 |
| 1 | 0.614736  | 1.979403  | -3.922589 |
| 6 | -3.231344 | -2.723335 | -2.031624 |
| 1 | -4.274178 | -2.667757 | -1.710709 |
| 1 | -3.061515 | -1.955748 | -2.790641 |
| 1 | -3.088245 | -3.699993 | -2.511635 |
| 6 | -4.234245 | 0.499912  | 1.556822  |
| 1 | -4.486717 | 1.094846  | 0.674434  |
| 1 | -5.099330 | 0.512446  | 2.231938  |
| 1 | -3.404084 | 0.978763  | 2.076948  |
| 6 | 1.691949  | -0.407987 | 1.960600  |
| 6 | 0.225178  | -2.118768 | 2.299825  |
| 1 | 2.404230  | 0.114006  | 1.326620  |
| 1 | 1.620381  | 0.018666  | 2.965233  |
| 1 | -0.245946 | -3.051167 | 1.990541  |

|   |           |           |           |
|---|-----------|-----------|-----------|
| 1 | -0.015700 | -1.851072 | 3.332510  |
| 6 | 1.627880  | -1.885291 | 1.889975  |
| 6 | 2.390706  | -2.770553 | 1.189158  |
| 6 | 3.631990  | -2.506399 | 0.470706  |
| 6 | 4.530261  | -1.468295 | 0.801745  |
| 6 | 3.980009  | -3.326131 | -0.624618 |
| 6 | 5.682788  | -1.242659 | 0.052739  |
| 1 | 4.329627  | -0.852210 | 1.671357  |
| 6 | 5.130038  | -3.098095 | -1.374898 |
| 1 | 3.315471  | -4.144348 | -0.893616 |
| 6 | 5.988934  | -2.045426 | -1.049401 |
| 1 | 6.356116  | -0.438477 | 0.339996  |
| 1 | 5.356661  | -3.744207 | -2.219694 |
| 1 | 6.887024  | -1.863482 | -1.632910 |
| 1 | 1.976174  | -3.769537 | 1.048604  |

### IM3A

SCF Energy: -3065.30911556

Sum of electronic and zero-point Energies= -3064.429450

Sum of electronic and thermal Energies= -3064.374931

Sum of electronic and thermal Enthalpies= -3064.373987

Sum of electronic and thermal Free Energies= -3064.518764

Electronic energy in solution by single point calculation = -3063.87981046

|   |           |           |           |
|---|-----------|-----------|-----------|
| 6 | -0.398152 | -3.640877 | 0.307697  |
| 6 | -0.169211 | -2.296608 | 0.627018  |
| 6 | -1.231133 | -1.594024 | 1.200577  |
| 6 | -2.478451 | -2.146120 | 1.492705  |
| 6 | -2.679419 | -3.479916 | 1.129088  |
| 6 | -1.649759 | -4.216119 | 0.539092  |
| 6 | -3.467540 | -1.270227 | 2.268969  |
| 6 | -3.330396 | 0.157437  | 1.734794  |
| 6 | -2.049677 | 0.585554  | 1.383856  |
| 6 | -1.757432 | 1.855309  | 0.878127  |
| 6 | -2.810927 | 2.778418  | 0.821332  |
| 6 | -4.101578 | 2.391921  | 1.184299  |
| 6 | -4.364470 | 1.087729  | 1.611834  |
| 1 | 0.397986  | -4.231736 | -0.129110 |
| 1 | -3.639407 | -3.950838 | 1.307238  |
| 1 | -1.819008 | -5.254471 | 0.269615  |
| 1 | -2.627952 | 3.787253  | 0.471908  |
| 1 | -4.913013 | 3.111058  | 1.123566  |
| 1 | -5.381094 | 0.800954  | 1.855612  |
| 8 | -0.984078 | -0.272351 | 1.513048  |

|    |           |           |           |
|----|-----------|-----------|-----------|
| 15 | -0.070410 | 2.089100  | 0.184801  |
| 15 | 1.408881  | -1.371568 | 0.358994  |
| 6  | -0.157800 | 3.773643  | -0.564715 |
| 6  | 0.787628  | 4.760939  | -0.251085 |
| 6  | -1.133945 | 4.070162  | -1.533254 |
| 6  | 0.761595  | 6.001718  | -0.889633 |
| 1  | 1.548254  | 4.566512  | 0.494960  |
| 6  | -1.163512 | 5.312694  | -2.163310 |
| 1  | -1.887493 | 3.335604  | -1.789610 |
| 6  | -0.211456 | 6.283410  | -1.847551 |
| 1  | 1.504828  | 6.750209  | -0.629799 |
| 1  | -1.930614 | 5.518438  | -2.904472 |
| 1  | -0.230419 | 7.249906  | -2.342742 |
| 6  | 1.020003  | 2.349776  | 1.625576  |
| 6  | 2.402861  | 2.396221  | 1.394675  |
| 6  | 0.525934  | 2.560068  | 2.917448  |
| 6  | 3.274791  | 2.698610  | 2.438008  |
| 1  | 2.797954  | 2.177570  | 0.406919  |
| 6  | 1.406781  | 2.827298  | 3.965777  |
| 1  | -0.542834 | 2.518781  | 3.101891  |
| 6  | 2.778802  | 2.912157  | 3.724997  |
| 1  | 4.343190  | 2.731888  | 2.246891  |
| 1  | 1.019112  | 2.976975  | 4.969519  |
| 1  | 3.461165  | 3.127087  | 4.542437  |
| 6  | 2.482115  | -2.685718 | -0.348711 |
| 6  | 2.172749  | -3.175406 | -1.629041 |
| 6  | 3.584858  | -3.216135 | 0.332310  |
| 6  | 2.946058  | -4.182590 | -2.203901 |
| 1  | 1.342796  | -2.755001 | -2.179193 |
| 6  | 4.368054  | -4.210865 | -0.255515 |
| 1  | 3.838298  | -2.855484 | 1.321796  |
| 6  | 4.050707  | -4.698743 | -1.522761 |
| 1  | 2.692732  | -4.551236 | -3.194111 |
| 1  | 5.223735  | -4.606715 | 0.284395  |
| 1  | 4.659263  | -5.475378 | -1.977876 |
| 6  | 2.045476  | -1.191736 | 2.075600  |
| 6  | 3.288069  | -0.563701 | 2.248978  |
| 6  | 1.359032  | -1.666784 | 3.201464  |
| 6  | 3.834643  | -0.429647 | 3.524588  |
| 1  | 3.829137  | -0.189014 | 1.385710  |
| 6  | 1.900415  | -1.510208 | 4.476972  |
| 1  | 0.406675  | -2.171496 | 3.087844  |
| 6  | 3.141454  | -0.894045 | 4.642418  |

|    |           |           |           |
|----|-----------|-----------|-----------|
| 1  | 4.799750  | 0.054669  | 3.642554  |
| 1  | 1.354391  | -1.880314 | 5.340593  |
| 1  | 3.565330  | -0.777654 | 5.636124  |
| 46 | 0.767091  | 0.443799  | -1.220180 |
| 6  | -3.022845 | -1.267336 | 3.758219  |
| 1  | -3.682630 | -0.620936 | 4.347588  |
| 1  | -3.070406 | -2.283141 | 4.165854  |
| 1  | -1.997301 | -0.901319 | 3.864957  |
| 6  | -4.905577 | -1.789605 | 2.177919  |
| 1  | -4.972140 | -2.801226 | 2.590022  |
| 1  | -5.577127 | -1.162956 | 2.773164  |
| 1  | -5.261981 | -1.806422 | 1.145732  |
| 6  | -0.375782 | 1.136055  | -2.833746 |
| 6  | -1.685652 | 0.621348  | -2.438902 |
| 6  | -2.150418 | -0.655461 | -2.544531 |
| 1  | -0.329385 | 2.217228  | -2.948542 |
| 1  | -2.329749 | 1.333374  | -1.928680 |
| 6  | -1.286350 | -1.762165 | -3.097279 |
| 1  | -0.329754 | -1.388378 | -3.464320 |
| 1  | -1.061987 | -2.497538 | -2.313269 |
| 1  | -1.793066 | -2.301446 | -3.907995 |
| 6  | -3.508452 | -1.018726 | -2.086895 |
| 6  | -4.495236 | -0.054379 | -1.789985 |
| 6  | -3.883043 | -2.371557 | -1.960905 |
| 6  | -5.777597 | -0.420856 | -1.398166 |
| 1  | -4.266969 | 1.001091  | -1.884541 |
| 6  | -5.169610 | -2.740911 | -1.573367 |
| 1  | -3.155143 | -3.149354 | -2.155813 |
| 6  | -6.131136 | -1.769540 | -1.294997 |
| 1  | -6.510474 | 0.352562  | -1.183875 |
| 1  | -5.419540 | -3.795427 | -1.489784 |
| 1  | -7.137836 | -2.055295 | -1.003023 |
| 6  | 3.090323  | 0.057704  | -2.987700 |
| 6  | 3.909296  | -0.889519 | -3.888901 |
| 1  | 4.886054  | -0.464424 | -4.145720 |
| 1  | 4.053046  | -1.849309 | -3.388193 |
| 1  | 3.337736  | -1.054969 | -4.807832 |
| 6  | 2.941466  | 1.439885  | -3.667510 |
| 1  | 2.388953  | 1.304560  | -4.602962 |
| 1  | 2.373591  | 2.116908  | -3.022805 |
| 1  | 3.915483  | 1.890290  | -3.889983 |
| 8  | 1.876077  | -0.541855 | -2.698454 |
| 6  | 3.876714  | 0.286928  | -1.725012 |

|   |          |          |           |
|---|----------|----------|-----------|
| 7 | 4.442343 | 0.486690 | -0.728675 |
| 1 | 0.112596 | 0.624890 | -3.659103 |

### IM3B

SCF Energy: -3696.04048818

|                                              |              |
|----------------------------------------------|--------------|
| Sum of electronic and zero-point Energies=   | -3694.952745 |
| Sum of electronic and thermal Energies=      | -3694.882818 |
| Sum of electronic and thermal Enthalpies=    | -3694.881874 |
| Sum of electronic and thermal Free Energies= | -3695.064566 |

Electronic energy in solution by single point calculation = -3694.41580614

|    |           |           |           |
|----|-----------|-----------|-----------|
| 6  | -0.262214 | -3.948192 | 1.624047  |
| 6  | -0.955017 | -2.823698 | 1.153589  |
| 6  | -1.978047 | -3.046783 | 0.222459  |
| 6  | -2.304668 | -4.307240 | -0.286078 |
| 6  | -1.575484 | -5.399337 | 0.192125  |
| 6  | -0.571883 | -5.221439 | 1.147296  |
| 6  | -3.460729 | -4.384784 | -1.289905 |
| 6  | -3.382262 | -3.137215 | -2.176355 |
| 6  | -3.010715 | -1.940920 | -1.562410 |
| 6  | -2.938751 | -0.711044 | -2.227459 |
| 6  | -3.286236 | -0.692347 | -3.582983 |
| 6  | -3.659581 | -1.871564 | -4.230656 |
| 6  | -3.701847 | -3.083480 | -3.537388 |
| 1  | 0.536577  | -3.819747 | 2.345822  |
| 1  | -1.787942 | -6.396892 | -0.176463 |
| 1  | -0.021400 | -6.082292 | 1.515504  |
| 1  | -3.247358 | 0.243706  | -4.130252 |
| 1  | -3.919367 | -1.847353 | -5.285045 |
| 1  | -3.990485 | -3.986989 | -4.063317 |
| 8  | -2.674774 | -1.943050 | -0.221783 |
| 15 | -2.281840 | 0.721837  | -1.276877 |
| 15 | -0.453518 | -1.087338 | 1.521501  |
| 6  | -2.396487 | 2.104413  | -2.491344 |
| 6  | -3.527453 | 2.918678  | -2.634636 |
| 6  | -1.255084 | 2.381202  | -3.258677 |
| 6  | -3.512959 | 3.995757  | -3.523102 |
| 1  | -4.413353 | 2.719488  | -2.040425 |
| 6  | -1.245565 | 3.448968  | -4.155744 |
| 1  | -0.371857 | 1.761648  | -3.120889 |
| 6  | -2.373026 | 4.264461  | -4.283639 |
| 1  | -4.392911 | 4.626433  | -3.619957 |
| 1  | -0.353984 | 3.654201  | -4.742263 |
| 1  | -2.361973 | 5.107030  | -4.969685 |

|    |           |           |           |
|----|-----------|-----------|-----------|
| 6  | -3.688656 | 1.076335  | -0.147232 |
| 6  | -3.429545 | 1.850353  | 0.989709  |
| 6  | -4.992011 | 0.612655  | -0.376843 |
| 6  | -4.459301 | 2.173028  | 1.871324  |
| 1  | -2.420411 | 2.193169  | 1.185355  |
| 6  | -6.018046 | 0.921236  | 0.516514  |
| 1  | -5.203071 | 0.009210  | -1.254316 |
| 6  | -5.753410 | 1.705818  | 1.640921  |
| 1  | -4.240723 | 2.774372  | 2.746661  |
| 1  | -7.023678 | 0.551989  | 0.332384  |
| 1  | -6.552232 | 1.946344  | 2.337514  |
| 6  | 1.041484  | -1.349773 | 2.576364  |
| 6  | 2.283968  | -1.406549 | 1.926500  |
| 6  | 1.003477  | -1.481991 | 3.972755  |
| 6  | 3.464739  | -1.585743 | 2.647769  |
| 1  | 2.322241  | -1.303520 | 0.848450  |
| 6  | 2.184395  | -1.652554 | 4.697252  |
| 1  | 0.051700  | -1.446692 | 4.492333  |
| 6  | 3.415764  | -1.702557 | 4.038403  |
| 1  | 4.403448  | -1.625408 | 2.105369  |
| 1  | 2.141401  | -1.749788 | 5.778998  |
| 1  | 4.331844  | -1.834425 | 4.608333  |
| 6  | -1.674170 | -0.515351 | 2.770515  |
| 6  | -1.411436 | 0.699777  | 3.425217  |
| 6  | -2.865592 | -1.191040 | 3.055116  |
| 6  | -2.299824 | 1.205293  | 4.369118  |
| 1  | -0.505868 | 1.252213  | 3.191850  |
| 6  | -3.768488 | -0.670232 | 3.984024  |
| 1  | -3.087953 | -2.127627 | 2.555211  |
| 6  | -3.484729 | 0.520378  | 4.651907  |
| 1  | -2.076387 | 2.143314  | 4.870421  |
| 1  | -4.693677 | -1.201867 | 4.188685  |
| 1  | -4.186695 | 0.919685  | 5.378661  |
| 46 | -0.168390 | 0.106352  | -0.475265 |
| 6  | -4.795043 | -4.328784 | -0.497779 |
| 1  | -5.645459 | -4.350718 | -1.188418 |
| 1  | -4.869402 | -5.186424 | 0.180246  |
| 1  | -4.859172 | -3.412382 | 0.096031  |
| 6  | -3.421826 | -5.678232 | -2.112388 |
| 1  | -3.507005 | -6.553111 | -1.460983 |
| 1  | -4.266067 | -5.717959 | -2.807024 |
| 1  | -2.494052 | -5.761545 | -2.687616 |
| 1  | 3.672086  | 1.579552  | 0.783058  |

|    |           |           |           |
|----|-----------|-----------|-----------|
| 6  | 1.656452  | 0.165767  | -1.210773 |
| 7  | 2.833513  | 0.181079  | -1.381569 |
| 13 | 4.603167  | 0.007096  | -0.915268 |
| 8  | 5.740311  | 0.868811  | -1.892020 |
| 8  | 4.523466  | 1.109139  | 0.634534  |
| 8  | 5.022532  | -1.540094 | -0.277609 |
| 6  | 6.459571  | 0.418532  | -3.024446 |
| 6  | 5.622671  | 1.831327  | 1.298074  |
| 6  | 5.004225  | -2.852917 | -0.805905 |
| 6  | 5.903843  | 3.120280  | 0.540748  |
| 1  | 5.018165  | 3.764009  | 0.513998  |
| 1  | 6.713160  | 3.672387  | 1.031189  |
| 1  | 6.196209  | 2.880573  | -0.485229 |
| 6  | 6.809916  | 0.887229  | 1.366882  |
| 1  | 6.529015  | -0.059839 | 1.834281  |
| 1  | 7.190557  | 0.684962  | 0.362156  |
| 1  | 7.607051  | 1.353161  | 1.955222  |
| 6  | 7.701602  | -0.363130 | -2.588991 |
| 1  | 7.407433  | -1.257759 | -2.027852 |
| 1  | 8.301239  | -0.674570 | -3.452655 |
| 1  | 8.329796  | 0.254957  | -1.938313 |
| 6  | 5.568450  | -0.405153 | -3.957940 |
| 1  | 5.253628  | -1.337387 | -3.468451 |
| 1  | 4.670282  | 0.160582  | -4.225946 |
| 1  | 6.097413  | -0.678200 | -4.878613 |
| 6  | 3.586061  | -3.282929 | -1.190561 |
| 1  | 2.934315  | -3.279811 | -0.310075 |
| 1  | 3.151660  | -2.601387 | -1.928968 |
| 1  | 3.588516  | -4.293954 | -1.615124 |
| 6  | 5.618003  | -3.796277 | 0.227585  |
| 1  | 5.002109  | -3.813857 | 1.134028  |
| 1  | 5.687868  | -4.817956 | -0.163346 |
| 1  | 6.622864  | -3.456822 | 0.500412  |
| 1  | 5.246750  | 2.037036  | 2.305783  |
| 1  | 6.788630  | 1.314680  | -3.571501 |
| 1  | 5.633541  | -2.888601 | -1.712231 |
| 6  | 1.763247  | 2.197069  | 1.466007  |
| 6  | 2.333947  | 3.329778  | 1.758015  |
| 6  | 1.331550  | 3.378024  | 0.620702  |
| 1  | 1.562071  | 1.156180  | 1.672664  |
| 1  | 2.972832  | 3.907356  | 2.413091  |
| 6  | -0.031355 | 3.959980  | 0.903359  |
| 6  | -0.880146 | 4.366990  | -0.137499 |

|   |           |          |           |
|---|-----------|----------|-----------|
| 6 | -0.489092 | 4.114915 | 2.222347  |
| 6 | -2.133491 | 4.917838 | 0.130476  |
| 1 | -0.576682 | 4.243466 | -1.169288 |
| 6 | -1.737956 | 4.672259 | 2.492276  |
| 1 | 0.143424  | 3.802868 | 3.048087  |
| 6 | -2.566498 | 5.080877 | 1.445722  |
| 1 | -2.773527 | 5.202399 | -0.698767 |
| 1 | -2.063998 | 4.785089 | 3.523029  |
| 1 | -3.544885 | 5.504000 | 1.653054  |
| 6 | 1.825784  | 3.512819 | -0.811339 |
| 1 | 1.186186  | 2.958602 | -1.503782 |
| 1 | 1.848454  | 4.564707 | -1.122223 |
| 1 | 2.834184  | 3.102923 | -0.909807 |

### IM3

SCF Energy: -2275.46272946

|                                              |              |
|----------------------------------------------|--------------|
| Sum of electronic and zero-point Energies=   | -2274.503813 |
| Sum of electronic and thermal Energies=      | -2274.450677 |
| Sum of electronic and thermal Enthalpies=    | -2274.449733 |
| Sum of electronic and thermal Free Energies= | -2274.585718 |

Electronic energy in solution by single point calculation = -2274.28195338

|    |           |           |           |
|----|-----------|-----------|-----------|
| 46 | -0.637196 | -0.731824 | 0.143575  |
| 15 | -0.918771 | 1.660368  | 0.375932  |
| 6  | 0.645269  | 2.674131  | 0.451431  |
| 6  | 1.920261  | 2.241356  | 0.003019  |
| 6  | 0.521678  | 4.006493  | 0.890306  |
| 6  | 2.964909  | 3.182997  | -0.044174 |
| 6  | 2.328362  | 0.830566  | -0.318226 |
| 6  | 1.575547  | 4.913808  | 0.857476  |
| 1  | -0.428176 | 4.350812  | 1.268478  |
| 6  | 2.809278  | 4.503055  | 0.361782  |
| 1  | 3.936694  | 2.842309  | -0.383088 |
| 6  | 2.693994  | -0.013056 | 0.763209  |
| 6  | 2.586850  | 0.416248  | -1.643511 |
| 1  | 1.425798  | 5.929823  | 1.210952  |
| 1  | 3.647955  | 5.191461  | 0.312243  |
| 6  | 3.197157  | -1.286117 | 0.487344  |
| 6  | 3.101408  | -0.868938 | -1.865684 |
| 6  | 3.413045  | -1.738344 | -0.819011 |
| 1  | 3.467423  | -1.937673 | 1.311822  |
| 1  | 3.314483  | -1.170133 | -2.885272 |
| 6  | -1.798313 | 2.516802  | -1.101098 |
| 6  | -1.890816 | 1.995044  | 2.002249  |

|   |           |           |           |
|---|-----------|-----------|-----------|
| 6 | -2.668817 | 3.315794  | 2.146758  |
| 1 | -3.086752 | 3.340791  | 3.161207  |
| 1 | -2.068134 | 4.219366  | 2.031208  |
| 1 | -3.511559 | 3.369514  | 1.452809  |
| 6 | -2.935972 | 0.864970  | 2.126287  |
| 1 | -3.650522 | 0.873650  | 1.298600  |
| 1 | -2.441593 | -0.103734 | 2.165975  |
| 1 | -3.499734 | 1.013101  | 3.057508  |
| 6 | -0.855776 | 2.368164  | -2.307040 |
| 1 | -0.448765 | 1.365568  | -2.396819 |
| 1 | -1.404194 | 2.600960  | -3.228610 |
| 1 | -0.018315 | 3.066103  | -2.229645 |
| 6 | -3.118616 | 1.776402  | -1.353791 |
| 1 | -2.983383 | 0.697265  | -1.420428 |
| 1 | -3.846955 | 1.971667  | -0.562029 |
| 1 | -3.559583 | 2.123606  | -2.296247 |
| 6 | 2.760958  | 0.527639  | 2.189990  |
| 1 | 2.030176  | 1.334996  | 2.285528  |
| 6 | 2.500481  | 1.375128  | -2.830186 |
| 1 | 1.933791  | 2.254608  | -2.516180 |
| 6 | 4.050698  | -3.105793 | -1.039737 |
| 1 | 4.802486  | -3.221754 | -0.246339 |
| 6 | 4.160617  | 1.127292  | 2.436894  |
| 1 | 4.219353  | 1.548763  | 3.447479  |
| 1 | 4.926996  | 0.348236  | 2.348105  |
| 1 | 4.400873  | 1.920937  | 1.724564  |
| 6 | 2.437844  | -0.503439 | 3.272623  |
| 1 | 2.434673  | -0.014295 | 4.254419  |
| 1 | 1.453248  | -0.924081 | 3.082672  |
| 1 | 3.174583  | -1.312734 | 3.312902  |
| 6 | 4.779281  | -3.232527 | -2.383487 |
| 1 | 5.495530  | -2.417464 | -2.535872 |
| 1 | 5.326040  | -4.180743 | -2.425981 |
| 1 | 4.074512  | -3.226671 | -3.223911 |
| 6 | 3.038776  | -4.253561 | -0.865471 |
| 1 | 2.548360  | -4.214632 | 0.111528  |
| 1 | 2.267463  | -4.208145 | -1.644203 |
| 1 | 3.546800  | -5.221417 | -0.953871 |
| 6 | 1.817876  | 0.794315  | -4.080009 |
| 1 | 1.765738  | 1.559925  | -4.862527 |
| 1 | 2.380712  | -0.051556 | -4.489827 |
| 1 | 0.800515  | 0.452134  | -3.880931 |
| 6 | 3.916860  | 1.848958  | -3.217666 |

|   |           |           |           |
|---|-----------|-----------|-----------|
| 1 | 4.526357  | 1.002268  | -3.553605 |
| 1 | 3.869026  | 2.578963  | -4.034534 |
| 1 | 4.434818  | 2.315254  | -2.375494 |
| 6 | -2.092087 | 4.022976  | -0.976814 |
| 1 | -2.815729 | 4.262459  | -0.199554 |
| 1 | -1.185242 | 4.607466  | -0.808085 |
| 1 | -2.518426 | 4.357109  | -1.931747 |
| 6 | -0.870674 | 1.865095  | 3.150106  |
| 1 | -0.152472 | 2.690313  | 3.153889  |
| 1 | -1.412547 | 1.885683  | 4.105105  |
| 1 | -0.340190 | 0.912596  | 3.086843  |
| 6 | -0.714520 | -0.980857 | -1.986155 |
| 6 | -0.091954 | -2.764473 | -0.531064 |
| 1 | -1.465937 | -0.477211 | -2.585124 |
| 1 | 0.317910  | -0.794729 | -2.264239 |
| 1 | -0.310270 | -3.647817 | 0.056596  |
| 1 | 0.958871  | -2.510884 | -0.621378 |
| 6 | -1.032961 | -2.252074 | -1.429708 |
| 6 | -2.381675 | -2.928253 | -1.613184 |
| 6 | -3.584250 | -2.013766 | -1.658333 |
| 6 | -4.100141 | -1.562057 | -2.877802 |
| 6 | -4.207523 | -1.605834 | -0.471937 |
| 6 | -5.215847 | -0.723244 | -2.915200 |
| 1 | -3.629908 | -1.878702 | -3.805893 |
| 6 | -5.327743 | -0.776881 | -0.505617 |
| 1 | -3.807901 | -1.936445 | 0.480520  |
| 6 | -5.835882 | -0.332267 | -1.728081 |
| 1 | -5.604427 | -0.383978 | -3.871356 |
| 1 | -5.801523 | -0.475353 | 0.424414  |
| 1 | -6.708870 | 0.313578  | -1.754810 |
| 1 | -2.321663 | -3.491131 | -2.554749 |
| 6 | -0.745177 | -2.281188 | 2.850840  |
| 6 | -0.782268 | -2.049574 | 4.380369  |
| 1 | -0.918393 | -2.987103 | 4.930891  |
| 1 | 0.139935  | -1.571921 | 4.716829  |
| 1 | -1.620054 | -1.379855 | 4.598869  |
| 6 | -2.049836 | -2.995428 | 2.432791  |
| 1 | -2.895399 | -2.353913 | 2.701530  |
| 1 | -2.069235 | -3.158830 | 1.354540  |
| 1 | -2.165730 | -3.961137 | 2.937521  |
| 8 | -0.548146 | -1.063279 | 2.224838  |
| 1 | -2.509293 | -3.672729 | -0.820233 |
| 6 | 0.399931  | -3.213696 | 2.562205  |

7 1.305161 -3.895016 2.302674

#### IM4A

SCF Energy: -2872.13490390

Sum of electronic and zero-point Energies= -2871.343844

Sum of electronic and thermal Energies= -2871.294426

Sum of electronic and thermal Enthalpies= -2871.293482

Sum of electronic and thermal Free Energies= -2871.427257

Electronic energy in solution by single point calculation = -2870.8002728

|    |           |           |           |
|----|-----------|-----------|-----------|
| 6  | -3.266926 | 1.379121  | 0.717040  |
| 6  | -2.064520 | 0.658890  | 0.796942  |
| 6  | -1.010217 | 1.269331  | 1.479055  |
| 6  | -1.092826 | 2.516096  | 2.104014  |
| 6  | -2.300886 | 3.205457  | 1.990123  |
| 6  | -3.374801 | 2.641309  | 1.298988  |
| 6  | 0.124283  | 2.979253  | 2.911806  |
| 6  | 1.367790  | 2.570533  | 2.120539  |
| 6  | 1.321959  | 1.343314  | 1.460436  |
| 6  | 2.372131  | 0.817769  | 0.704735  |
| 6  | 3.565248  | 1.551026  | 0.669205  |
| 6  | 3.651291  | 2.780651  | 1.325260  |
| 6  | 2.560493  | 3.292468  | 2.032591  |
| 1  | -4.112165 | 0.956008  | 0.189016  |
| 1  | -2.409308 | 4.186802  | 2.437432  |
| 1  | -4.308060 | 3.190169  | 1.215982  |
| 1  | 4.419188  | 1.168762  | 0.122992  |
| 1  | 4.578058  | 3.345259  | 1.285075  |
| 1  | 2.646786  | 4.256433  | 2.521664  |
| 8  | 0.181463  | 0.572543  | 1.522304  |
| 15 | 1.991458  | -0.726878 | -0.220196 |
| 15 | -1.791315 | -0.963992 | -0.044512 |
| 6  | 3.577968  | -1.088291 | -1.082849 |
| 6  | 4.221612  | -2.324460 | -0.926496 |
| 6  | 4.123274  | -0.159555 | -1.987391 |
| 6  | 5.376229  | -2.621757 | -1.651178 |
| 1  | 3.822153  | -3.058964 | -0.237144 |
| 6  | 5.281790  | -0.455571 | -2.703794 |
| 1  | 3.651550  | 0.806134  | -2.129095 |
| 6  | 5.911461  | -1.690440 | -2.540707 |
| 1  | 5.858610  | -3.585530 | -1.514931 |
| 1  | 5.687327  | 0.279037  | -3.393646 |
| 1  | 6.810532  | -1.923968 | -3.103476 |
| 6  | 1.956835  | -2.000033 | 1.094143  |

|    |           |           |           |
|----|-----------|-----------|-----------|
| 6  | 1.372425  | -3.238548 | 0.796833  |
| 6  | 2.538847  | -1.794958 | 2.351048  |
| 6  | 1.394685  | -4.266500 | 1.737627  |
| 1  | 0.899627  | -3.387879 | -0.170070 |
| 6  | 2.537349  | -2.818071 | 3.298399  |
| 1  | 2.994504  | -0.838629 | 2.586948  |
| 6  | 1.971427  | -4.056336 | 2.990628  |
| 1  | 0.936880  | -5.220758 | 1.500278  |
| 1  | 2.984003  | -2.649585 | 4.274480  |
| 1  | 1.972457  | -4.853652 | 3.728443  |
| 6  | -3.475252 | -1.244092 | -0.730554 |
| 6  | -3.764222 | -0.864327 | -2.046254 |
| 6  | -4.513350 | -1.722290 | 0.085705  |
| 6  | -5.065035 | -0.966297 | -2.540965 |
| 1  | -2.971280 | -0.517358 | -2.692594 |
| 6  | -5.810762 | -1.827198 | -0.412074 |
| 1  | -4.307873 | -2.008822 | 1.111387  |
| 6  | -6.089618 | -1.449088 | -1.727755 |
| 1  | -5.268337 | -0.682968 | -3.569406 |
| 1  | -6.603704 | -2.203707 | 0.228196  |
| 1  | -7.100467 | -1.535731 | -2.116465 |
| 6  | -1.740600 | -2.218267 | 1.292707  |
| 6  | -1.969378 | -3.551921 | 0.913215  |
| 6  | -1.467993 | -1.924499 | 2.631931  |
| 6  | -1.957416 | -4.565661 | 1.867044  |
| 1  | -2.174379 | -3.787904 | -0.127585 |
| 6  | -1.434336 | -2.947802 | 3.580996  |
| 1  | -1.290325 | -0.901581 | 2.941163  |
| 6  | -1.687647 | -4.266153 | 3.204918  |
| 1  | -2.152768 | -5.590741 | 1.564518  |
| 1  | -1.216066 | -2.709081 | 4.618023  |
| 1  | -1.670219 | -5.058071 | 3.948376  |
| 46 | 0.032177  | -0.888802 | -1.634934 |
| 6  | 0.134478  | 2.200177  | 4.256031  |
| 1  | 1.007059  | 2.489102  | 4.852308  |
| 1  | -0.772354 | 2.424179  | 4.828230  |
| 1  | 0.178411  | 1.120161  | 4.087444  |
| 6  | 0.088768  | 4.481644  | 3.209995  |
| 1  | -0.793721 | 4.731708  | 3.806656  |
| 1  | 0.962397  | 4.777118  | 3.798969  |
| 1  | 0.066735  | 5.068921  | 2.289049  |
| 6  | 1.049354  | -0.006905 | -3.288385 |
| 6  | 0.905517  | 1.304032  | -2.667306 |

|   |           |           |           |
|---|-----------|-----------|-----------|
| 6 | -0.195811 | 2.116799  | -2.658836 |
| 1 | 2.065668  | -0.381848 | -3.373979 |
| 1 | 1.732466  | 1.605706  | -2.031223 |
| 6 | -1.422633 | 1.788729  | -3.474250 |
| 1 | -1.278698 | 0.895761  | -4.082500 |
| 1 | -2.291874 | 1.606352  | -2.831868 |
| 1 | -1.685029 | 2.622356  | -4.138161 |
| 6 | -0.240986 | 3.337578  | -1.827674 |
| 6 | 0.907263  | 3.895281  | -1.224627 |
| 6 | -1.463671 | 4.004674  | -1.610101 |
| 6 | 0.836209  | 5.057317  | -0.466481 |
| 1 | 1.876718  | 3.429018  | -1.357863 |
| 6 | -1.536768 | 5.163634  | -0.840878 |
| 1 | -2.376171 | 3.608010  | -2.037789 |
| 6 | -0.386504 | 5.706491  | -0.271048 |
| 1 | 1.744531  | 5.459206  | -0.026911 |
| 1 | -2.499442 | 5.645115  | -0.692249 |
| 1 | -0.437714 | 6.622285  | 0.311424  |
| 6 | -0.974170 | -1.916955 | -3.019459 |
| 7 | -1.519699 | -2.568631 | -3.824598 |
| 1 | 0.474016  | -0.202368 | -4.187126 |

#### IM4B

SCF Energy: -3696.10683104

|                                              |              |
|----------------------------------------------|--------------|
| Sum of electronic and zero-point Energies=   | -3695.015515 |
| Sum of electronic and thermal Energies=      | -3694.947252 |
| Sum of electronic and thermal Enthalpies=    | -3694.946307 |
| Sum of electronic and thermal Free Energies= | -3695.123994 |

Electronic energy in solution by single point calculation = -3694.4627839

|   |           |           |           |
|---|-----------|-----------|-----------|
| 6 | -1.981748 | 3.869855  | 0.319097  |
| 6 | -0.907540 | 3.010873  | 0.048253  |
| 6 | -0.432293 | 2.965524  | -1.274952 |
| 6 | -0.960749 | 3.769055  | -2.291810 |
| 6 | -2.035080 | 4.604406  | -1.979724 |
| 6 | -2.547099 | 4.650635  | -0.684420 |
| 6 | -0.279014 | 3.710741  | -3.658732 |
| 6 | 0.070869  | 2.246594  | -3.923690 |
| 6 | 0.542093  | 1.489312  | -2.843412 |
| 6 | 0.955464  | 0.152032  | -2.984331 |
| 6 | 0.879261  | -0.416671 | -4.263972 |
| 6 | 0.400829  | 0.312282  | -5.347728 |
| 6 | -0.003610 | 1.635057  | -5.176039 |
| 1 | -2.400884 | 3.898635  | 1.316837  |

|    |           |           |           |
|----|-----------|-----------|-----------|
| 1  | -2.478775 | 5.224911  | -2.749622 |
| 1  | -3.390731 | 5.294371  | -0.456122 |
| 1  | 1.170755  | -1.450924 | -4.402387 |
| 1  | 0.337731  | -0.152424 | -6.326815 |
| 1  | -0.376950 | 2.191763  | -6.027666 |
| 8  | 0.603608  | 2.093925  | -1.593894 |
| 15 | 1.512748  | -0.871610 | -1.552323 |
| 15 | -0.216143 | 1.911652  | 1.357103  |
| 6  | 1.219520  | -2.596716 | -2.062823 |
| 6  | 2.083486  | -3.298676 | -2.918434 |
| 6  | 0.054149  | -3.220339 | -1.590022 |
| 6  | 1.774347  | -4.601795 | -3.306398 |
| 1  | 2.996441  | -2.829130 | -3.271891 |
| 6  | -0.257918 | -4.517894 | -1.994821 |
| 1  | -0.603361 | -2.707072 | -0.897192 |
| 6  | 0.600170  | -5.208605 | -2.851792 |
| 1  | 2.448436  | -5.142219 | -3.965021 |
| 1  | -1.169606 | -4.978453 | -1.628335 |
| 1  | 0.360098  | -6.222069 | -3.160778 |
| 6  | 3.318012  | -0.623050 | -1.507794 |
| 6  | 4.161193  | -1.621111 | -1.003568 |
| 6  | 3.852655  | 0.636545  | -1.816814 |
| 6  | 5.519523  | -1.369261 | -0.821758 |
| 1  | 3.757266  | -2.589180 | -0.730702 |
| 6  | 5.211170  | 0.885572  | -1.631203 |
| 1  | 3.207238  | 1.422819  | -2.194382 |
| 6  | 6.046777  | -0.116320 | -1.132573 |
| 1  | 6.152434  | -2.142229 | -0.400039 |
| 1  | 5.616367  | 1.863885  | -1.874879 |
| 1  | 7.103267  | 0.082090  | -0.977189 |
| 6  | -1.445252 | 1.869650  | 2.695344  |
| 6  | -2.169612 | 0.681337  | 2.863777  |
| 6  | -1.716255 | 2.975801  | 3.520986  |
| 6  | -3.178478 | 0.612756  | 3.826844  |
| 1  | -1.967851 | -0.190679 | 2.247819  |
| 6  | -2.714593 | 2.894635  | 4.488309  |
| 1  | -1.144018 | 3.892014  | 3.407802  |
| 6  | -3.451536 | 1.713949  | 4.636292  |
| 1  | -3.759632 | -0.298498 | 3.912867  |
| 1  | -2.922029 | 3.751045  | 5.123707  |
| 1  | -4.238271 | 1.658506  | 5.383490  |
| 6  | 1.235990  | 2.817024  | 1.999564  |
| 6  | 1.554301  | 2.802138  | 3.363477  |

|    |           |           |           |
|----|-----------|-----------|-----------|
| 6  | 2.144588  | 3.380292  | 1.090332  |
| 6  | 2.755920  | 3.352622  | 3.811767  |
| 1  | 0.870001  | 2.352307  | 4.074165  |
| 6  | 3.343335  | 3.927488  | 1.541345  |
| 1  | 1.927550  | 3.364440  | 0.027925  |
| 6  | 3.653563  | 3.914695  | 2.903712  |
| 1  | 2.990832  | 3.335236  | 4.872246  |
| 1  | 4.039613  | 4.358400  | 0.827397  |
| 1  | 4.590216  | 4.338902  | 3.253813  |
| 46 | 0.364048  | -0.040752 | 0.266047  |
| 6  | 1.043318  | 4.521838  | -3.578578 |
| 1  | 1.574546  | 4.472063  | -4.535308 |
| 1  | 0.829166  | 5.571158  | -3.348481 |
| 1  | 1.702174  | 4.127679  | -2.799621 |
| 6  | -1.152984 | 4.308251  | -4.768150 |
| 1  | -1.369188 | 5.360259  | -4.561561 |
| 1  | -0.629923 | 4.278466  | -5.728167 |
| 1  | -2.101203 | 3.770941  | -4.870715 |
| 1  | 0.812253  | -0.644093 | 3.294586  |
| 6  | -1.438789 | -0.184500 | -0.684127 |
| 7  | -2.527579 | -0.528015 | -0.955725 |
| 13 | -3.473470 | -1.766969 | 0.240051  |
| 8  | -4.008530 | -3.138069 | -0.685161 |
| 8  | -2.136782 | -2.235851 | 1.288535  |
| 8  | -4.623901 | -0.776082 | 1.088380  |
| 6  | -5.115629 | -3.313654 | -1.535409 |
| 6  | -2.124420 | -3.329200 | 2.187399  |
| 6  | -5.524166 | 0.220237  | 0.669839  |
| 6  | -1.725226 | -4.614454 | 1.457210  |
| 1  | -0.747557 | -4.494429 | 0.980295  |
| 1  | -1.670728 | -5.465174 | 2.148082  |
| 1  | -2.465455 | -4.833593 | 0.679778  |
| 6  | -3.468234 | -3.495619 | 2.903923  |
| 1  | -3.769100 | -2.558458 | 3.382295  |
| 1  | -4.248649 | -3.775501 | 2.185658  |
| 1  | -3.413164 | -4.278941 | 3.669819  |
| 6  | -6.416425 | -3.384156 | -0.728547 |
| 1  | -6.593741 | -2.434480 | -0.211439 |
| 1  | -7.278246 | -3.597454 | -1.373373 |
| 1  | -6.344480 | -4.171702 | 0.029155  |
| 6  | -5.176446 | -2.225250 | -2.612527 |
| 1  | -5.355410 | -1.242295 | -2.158347 |
| 1  | -4.226754 | -2.175888 | -3.155145 |

|   |           |           |           |
|---|-----------|-----------|-----------|
| 1 | -5.983345 | -2.418987 | -3.330177 |
| 6 | -4.824037 | 1.577959  | 0.532060  |
| 1 | -4.413921 | 1.887535  | 1.499345  |
| 1 | -3.999515 | 1.516445  | -0.183081 |
| 1 | -5.524959 | 2.349275  | 0.187670  |
| 6 | -6.673025 | 0.287830  | 1.677886  |
| 1 | -6.280209 | 0.554927  | 2.666299  |
| 1 | -7.421259 | 1.034992  | 1.386078  |
| 1 | -7.163680 | -0.687819 | 1.759624  |
| 1 | -1.357417 | -3.110241 | 2.948003  |
| 1 | -4.981818 | -4.281368 | -2.046201 |
| 1 | -5.955115 | -0.038537 | -0.314499 |
| 6 | 2.020577  | -0.185463 | 1.472173  |
| 6 | 1.820873  | -0.451570 | 2.931604  |
| 6 | 2.428829  | -1.538113 | 2.043784  |
| 1 | 2.837085  | 0.481580  | 1.204610  |
| 1 | 2.468476  | 0.031523  | 3.659005  |
| 6 | 3.890648  | -1.815139 | 2.220146  |
| 6 | 4.406667  | -3.113444 | 2.084772  |
| 6 | 4.801457  | -0.784281 | 2.516030  |
| 6 | 5.771493  | -3.372239 | 2.229225  |
| 1 | 3.738108  | -3.937445 | 1.861361  |
| 6 | 6.161968  | -1.039188 | 2.659257  |
| 1 | 4.447104  | 0.236245  | 2.624619  |
| 6 | 6.659961  | -2.336850 | 2.515847  |
| 1 | 6.136477  | -4.390375 | 2.119867  |
| 1 | 6.838476  | -0.218375 | 2.883218  |
| 1 | 7.721841  | -2.535967 | 2.630265  |
| 6 | 1.532735  | -2.726929 | 1.748241  |
| 1 | 1.814465  | -3.226210 | 0.813717  |
| 1 | 1.568029  | -3.470421 | 2.554189  |
| 1 | 0.494720  | -2.401483 | 1.634102  |

#### IM4

SCF Energy: -2275.45171423

|                                              |              |
|----------------------------------------------|--------------|
| Sum of electronic and zero-point Energies=   | -2274.502176 |
| Sum of electronic and thermal Energies=      | -2274.448591 |
| Sum of electronic and thermal Enthalpies=    | -2274.447647 |
| Sum of electronic and thermal Free Energies= | -2274.587402 |

Electronic energy in solution by single point calculation = -2274.26586607

|    |           |           |           |
|----|-----------|-----------|-----------|
| 46 | 0.460718  | -0.787344 | 0.134526  |
| 15 | -1.696439 | -1.403663 | -0.800276 |
| 6  | -3.118868 | -0.200464 | -0.697020 |

|   |           |           |           |
|---|-----------|-----------|-----------|
| 6 | -3.074598 | 1.066452  | -0.061915 |
| 6 | -4.346240 | -0.605402 | -1.258267 |
| 6 | -4.270980 | 1.795671  | 0.069693  |
| 6 | -1.845226 | 1.786033  | 0.412303  |
| 6 | -5.510320 | 0.148550  | -1.151462 |
| 1 | -4.398281 | -1.538995 | -1.795929 |
| 6 | -5.480040 | 1.352479  | -0.452785 |
| 1 | -4.226925 | 2.750866  | 0.582124  |
| 6 | -1.350979 | 1.605723  | 1.721595  |
| 6 | -1.292073 | 2.788648  | -0.419455 |
| 1 | -6.430384 | -0.210724 | -1.603237 |
| 1 | -6.378953 | 1.950174  | -0.332699 |
| 6 | -0.235944 | 2.347208  | 2.129682  |
| 6 | -0.207872 | 3.534190  | 0.052139  |
| 6 | 0.359619  | 3.304922  | 1.308451  |
| 1 | 0.166992  | 2.190727  | 3.125870  |
| 1 | 0.217168  | 4.303135  | -0.585512 |
| 6 | -1.469679 | -1.713931 | -2.688633 |
| 6 | -2.394242 | -2.987183 | 0.035824  |
| 6 | -3.737095 | -3.564727 | -0.452347 |
| 1 | -3.894633 | -4.510788 | 0.081242  |
| 1 | -4.576802 | -2.914354 | -0.198979 |
| 1 | -3.771654 | -3.788126 | -1.518240 |
| 6 | -1.309694 | -4.071028 | -0.116047 |
| 1 | -1.257482 | -4.450669 | -1.141548 |
| 1 | -0.330879 | -3.697192 | 0.186436  |
| 1 | -1.564378 | -4.918719 | 0.532855  |
| 6 | -1.587020 | -0.343957 | -3.380745 |
| 1 | -0.998586 | 0.422225  | -2.875911 |
| 1 | -1.224462 | -0.424876 | -4.413411 |
| 1 | -2.624341 | 0.000721  | -3.411017 |
| 6 | -0.053983 | -2.287106 | -2.902203 |
| 1 | 0.717604  | -1.629076 | -2.507906 |
| 1 | 0.069785  | -3.259870 | -2.419743 |
| 1 | 0.119825  | -2.420742 | -3.977917 |
| 6 | -2.106766 | 0.749591  | 2.727171  |
| 1 | -2.675284 | 0.005733  | 2.165554  |
| 6 | -1.875270 | 3.119809  | -1.791458 |
| 1 | -2.505094 | 2.281903  | -2.103145 |
| 6 | 1.559175  | 4.106193  | 1.785680  |
| 1 | 1.881774  | 3.670095  | 2.740755  |
| 6 | -3.120470 | 1.631940  | 3.483158  |
| 1 | -3.695804 | 1.027110  | 4.193936  |

|   |           |           |           |
|---|-----------|-----------|-----------|
| 1 | -2.601298 | 2.416890  | 4.045866  |
| 1 | -3.825560 | 2.116098  | 2.800797  |
| 6 | -1.211468 | -0.004268 | 3.715461  |
| 1 | -1.830533 | -0.651335 | 4.348559  |
| 1 | -0.492807 | -0.631073 | 3.184030  |
| 1 | -0.674834 | 0.680448  | 4.383449  |
| 6 | 1.169669  | 5.571731  | 2.048272  |
| 1 | 0.350174  | 5.637857  | 2.771888  |
| 1 | 2.023008  | 6.137661  | 2.439806  |
| 1 | 0.839160  | 6.058438  | 1.122966  |
| 6 | 2.743702  | 4.019883  | 0.807987  |
| 1 | 3.041916  | 2.982332  | 0.627106  |
| 1 | 2.491583  | 4.467542  | -0.160317 |
| 1 | 3.609914  | 4.560165  | 1.206658  |
| 6 | -0.811070 | 3.328284  | -2.882296 |
| 1 | -1.297694 | 3.445900  | -3.857046 |
| 1 | -0.218378 | 4.232377  | -2.704128 |
| 1 | -0.118936 | 2.485717  | -2.948450 |
| 6 | -2.769469 | 4.371846  | -1.706556 |
| 1 | -2.185597 | 5.238048  | -1.373793 |
| 1 | -3.197533 | 4.607159  | -2.688201 |
| 1 | -3.593183 | 4.231675  | -1.001959 |
| 6 | -2.448401 | -2.681293 | -3.376174 |
| 1 | -2.350474 | -3.702652 | -3.002144 |
| 1 | -3.492517 | -2.373022 | -3.294178 |
| 1 | -2.206843 | -2.704496 | -4.446759 |
| 6 | -2.592992 | -2.636634 | 1.522713  |
| 1 | -3.389867 | -1.894971 | 1.641744  |
| 1 | -2.909693 | -3.544975 | 2.053165  |
| 1 | -1.669077 | -2.282802 | 1.977828  |
| 6 | 1.169409  | 0.672898  | -1.307750 |
| 6 | 2.409966  | 0.072015  | 0.643421  |
| 1 | 0.990966  | 0.566774  | -2.372725 |
| 1 | 0.798660  | 1.588482  | -0.864217 |
| 1 | 3.175813  | -0.522619 | 1.127431  |
| 1 | 2.026762  | 0.920397  | 1.204518  |
| 6 | 2.312232  | 0.041755  | -0.758486 |
| 6 | 3.238341  | -0.834047 | -1.584640 |
| 6 | 4.665327  | -0.333905 | -1.482518 |
| 6 | 5.603944  | -1.028363 | -0.711315 |
| 6 | 5.051272  | 0.853251  | -2.117314 |
| 6 | 6.906599  | -0.542975 | -0.579235 |
| 1 | 5.305421  | -1.949777 | -0.218862 |

|   |          |           |           |
|---|----------|-----------|-----------|
| 6 | 6.351327 | 1.339259  | -1.985484 |
| 1 | 4.325998 | 1.399026  | -2.717153 |
| 6 | 7.283629 | 0.641220  | -1.213940 |
| 1 | 7.627602 | -1.093366 | 0.019222  |
| 1 | 6.638005 | 2.260817  | -2.485076 |
| 1 | 8.297524 | 1.017994  | -1.110981 |
| 1 | 3.188760 | -1.864358 | -1.222376 |
| 6 | 1.385752 | -2.729517 | 2.388883  |
| 6 | 2.038971 | -1.863652 | 3.491435  |
| 1 | 2.921718 | -2.348926 | 3.923331  |
| 1 | 2.326485 | -0.888163 | 3.096155  |
| 1 | 1.301745 | -1.705752 | 4.284257  |
| 6 | 0.872863 | -4.044993 | 3.023425  |
| 1 | 0.076114 | -3.786973 | 3.727940  |
| 1 | 0.458166 | -4.700311 | 2.254108  |
| 1 | 1.666366 | -4.578572 | 3.558490  |
| 8 | 0.323585 | -2.099126 | 1.762427  |
| 1 | 2.904641 | -0.824551 | -2.628099 |
| 6 | 2.442244 | -3.108581 | 1.395953  |
| 7 | 3.236330 | -3.397291 | 0.596986  |

## IM5A

SCF Energy: -2872.15116130

|                                              |              |
|----------------------------------------------|--------------|
| Sum of electronic and zero-point Energies=   | -2871.359685 |
| Sum of electronic and thermal Energies=      | -2871.310465 |
| Sum of electronic and thermal Enthalpies=    | -2871.309520 |
| Sum of electronic and thermal Free Energies= | -2871.443257 |

Electronic energy in solution by single point calculation = -2870.82218717

|   |           |          |          |
|---|-----------|----------|----------|
| 6 | -3.503006 | 1.138477 | 0.824093 |
| 6 | -2.200895 | 0.639495 | 0.955310 |
| 6 | -1.231414 | 1.520235 | 1.451701 |
| 6 | -1.489143 | 2.837798 | 1.826468 |
| 6 | -2.802953 | 3.293028 | 1.689587 |
| 6 | -3.797788 | 2.450025 | 1.193978 |
| 6 | -0.321323 | 3.657686 | 2.385459 |
| 6 | 0.941917  | 3.256128 | 1.615552 |
| 6 | 1.073421  | 1.917741 | 1.241923 |
| 6 | 2.177811  | 1.404533 | 0.547296 |
| 6 | 3.226984  | 2.290685 | 0.272218 |
| 6 | 3.132694  | 3.634277 | 0.639033 |
| 6 | 1.997148  | 4.115403 | 1.293533 |
| 1 | -4.279839 | 0.511652 | 0.403613 |
| 1 | -3.054856 | 4.313402 | 1.955221 |

|    |           |           |           |
|----|-----------|-----------|-----------|
| 1  | -4.810385 | 2.824845  | 1.078297  |
| 1  | 4.107824  | 1.933751  | -0.249027 |
| 1  | 3.949840  | 4.312302  | 0.410936  |
| 1  | 1.940829  | 5.165978  | 1.556268  |
| 8  | 0.060975  | 1.032153  | 1.537417  |
| 15 | 2.066701  | -0.330217 | -0.079997 |
| 15 | -1.607058 | -0.979219 | 0.309394  |
| 6  | 3.665802  | -0.539587 | -0.970636 |
| 6  | 4.655204  | -1.438967 | -0.552909 |
| 6  | 3.865708  | 0.174062  | -2.165435 |
| 6  | 5.812044  | -1.623428 | -1.313866 |
| 1  | 4.522229  | -1.999099 | 0.365861  |
| 6  | 5.026749  | 0.000972  | -2.915512 |
| 1  | 3.108885  | 0.875980  | -2.498493 |
| 6  | 6.003428  | -0.905568 | -2.493781 |
| 1  | 6.566707  | -2.329089 | -0.977549 |
| 1  | 5.167483  | 0.569442  | -3.830902 |
| 1  | 6.905030  | -1.049816 | -3.082189 |
| 6  | 2.331611  | -1.333568 | 1.429092  |
| 6  | 1.938543  | -2.678108 | 1.392420  |
| 6  | 2.935503  | -0.824318 | 2.585386  |
| 6  | 2.170696  | -3.507816 | 2.487350  |
| 1  | 1.440331  | -3.063594 | 0.507325  |
| 6  | 3.147131  | -1.651337 | 3.688598  |
| 1  | 3.241633  | 0.216781  | 2.619708  |
| 6  | 2.771323  | -2.994677 | 3.638128  |
| 1  | 1.855733  | -4.545440 | 2.452437  |
| 1  | 3.610178  | -1.247796 | 4.585128  |
| 1  | 2.935913  | -3.638315 | 4.497799  |
| 6  | -3.105307 | -1.850942 | -0.297431 |
| 6  | -3.023957 | -2.491990 | -1.539280 |
| 6  | -4.265056 | -2.008426 | 0.479303  |
| 6  | -4.098524 | -3.246163 | -2.017843 |
| 1  | -2.107088 | -2.419886 | -2.114343 |
| 6  | -5.341819 | -2.747200 | -0.005202 |
| 1  | -4.315247 | -1.566878 | 1.470063  |
| 6  | -5.261738 | -3.363394 | -1.258431 |
| 1  | -4.018290 | -3.743893 | -2.979959 |
| 1  | -6.238426 | -2.856075 | 0.598899  |
| 1  | -6.099984 | -3.945743 | -1.630993 |
| 6  | -1.303212 | -1.993339 | 1.826828  |
| 6  | -1.395301 | -3.389980 | 1.708295  |
| 6  | -0.958208 | -1.445158 | 3.067958  |

|    |           |           |           |
|----|-----------|-----------|-----------|
| 6  | -1.167843 | -4.213757 | 2.808217  |
| 1  | -1.663082 | -3.834432 | 0.754437  |
| 6  | -0.721034 | -2.273016 | 4.165664  |
| 1  | -0.874341 | -0.372889 | 3.186820  |
| 6  | -0.830543 | -3.657505 | 4.043404  |
| 1  | -1.255422 | -5.291489 | 2.698964  |
| 1  | -0.450681 | -1.829811 | 5.120047  |
| 1  | -0.649810 | -4.298619 | 4.901720  |
| 46 | 0.059224  | -0.462197 | -1.263748 |
| 6  | -0.120058 | 3.264908  | 3.873715  |
| 1  | 0.724141  | 3.817520  | 4.301148  |
| 1  | -1.021829 | 3.495681  | 4.451508  |
| 1  | 0.086929  | 2.195033  | 3.971259  |
| 6  | -0.592277 | 5.164713  | 2.297227  |
| 1  | -1.476602 | 5.430837  | 2.883456  |
| 1  | 0.243858  | 5.734882  | 2.712288  |
| 1  | -0.754271 | 5.480475  | 1.262133  |
| 6  | 0.995887  | -0.924703 | -4.134410 |
| 6  | 0.487154  | 0.221016  | -3.264012 |
| 6  | -0.884730 | 0.507206  | -3.042596 |
| 1  | 2.089445  | -0.950189 | -4.065615 |
| 1  | 1.183874  | 1.053529  | -3.259617 |
| 6  | -1.972172 | -0.234803 | -3.793677 |
| 1  | -1.646451 | -1.224510 | -4.115164 |
| 1  | -2.872671 | -0.376677 | -3.191604 |
| 1  | -2.262079 | 0.329712  | -4.693395 |
| 6  | -1.248027 | 1.858148  | -2.516892 |
| 6  | -0.293034 | 2.719950  | -1.932324 |
| 6  | -2.571794 | 2.330994  | -2.582861 |
| 6  | -0.640160 | 3.981498  | -1.463433 |
| 1  | 0.732012  | 2.391792  | -1.810881 |
| 6  | -2.921900 | 3.592497  | -2.101157 |
| 1  | -3.346233 | 1.708214  | -3.014689 |
| 6  | -1.960303 | 4.431574  | -1.543170 |
| 1  | 0.128311  | 4.606736  | -1.018438 |
| 1  | -3.957372 | 3.916853  | -2.165605 |
| 1  | -2.233395 | 5.414508  | -1.169398 |
| 6  | 0.513866  | -2.252849 | -3.730734 |
| 7  | 0.130146  | -3.308821 | -3.434354 |
| 1  | 0.746742  | -0.783244 | -5.197751 |

## IM5B

SCF Energy: -3696.12343013

|                                                             |           |           |           |                |
|-------------------------------------------------------------|-----------|-----------|-----------|----------------|
| Sum of electronic and zero-point Energies=                  |           |           |           | -3695.030725   |
| Sum of electronic and thermal Energies=                     |           |           |           | -3694.962578   |
| Sum of electronic and thermal Enthalpies=                   |           |           |           | -3694.961634   |
| Sum of electronic and thermal Free Energies=                |           |           |           | -3695.139390   |
| Electronic energy in solution by single point calculation = |           |           |           | -3694.48717614 |
| 6                                                           | -0.156260 | -1.556807 | -3.904795 |                |
| 6                                                           | -0.456292 | -1.619623 | -2.535762 |                |
| 6                                                           | -1.780942 | -1.903804 | -2.182058 |                |
| 6                                                           | -2.809425 | -2.080085 | -3.114861 |                |
| 6                                                           | -2.473537 | -1.978257 | -4.466498 |                |
| 6                                                           | -1.156324 | -1.731948 | -4.858416 |                |
| 6                                                           | -4.204222 | -2.426784 | -2.581746 |                |
| 6                                                           | -4.402834 | -1.642887 | -1.282470 |                |
| 6                                                           | -3.297702 | -1.503466 | -0.445448 |                |
| 6                                                           | -3.328566 | -0.836054 | 0.781872  |                |
| 6                                                           | -4.551027 | -0.298057 | 1.197548  |                |
| 6                                                           | -5.679716 | -0.420329 | 0.385403  |                |
| 6                                                           | -5.606279 | -1.080132 | -0.843508 |                |
| 1                                                           | 0.857325  | -1.339789 | -4.219941 |                |
| 1                                                           | -3.239395 | -2.096945 | -5.224705 |                |
| 1                                                           | -0.911066 | -1.665705 | -5.913974 |                |
| 1                                                           | -4.607558 | 0.234510  | 2.140824  |                |
| 1                                                           | -6.623875 | 0.007730  | 0.708655  |                |
| 1                                                           | -6.495008 | -1.152398 | -1.460592 |                |
| 8                                                           | -2.067123 | -2.001311 | -0.837915 |                |
| 15                                                          | -1.720424 | -0.569206 | 1.616222  |                |
| 15                                                          | 0.786892  | -1.202106 | -1.240189 |                |
| 6                                                           | -2.189714 | 0.316034  | 3.151198  |                |
| 6                                                           | -2.675626 | -0.347624 | 4.287877  |                |
| 6                                                           | -2.051607 | 1.711819  | 3.169223  |                |
| 6                                                           | -3.021039 | 0.376984  | 5.428120  |                |
| 1                                                           | -2.775831 | -1.428637 | 4.281837  |                |
| 6                                                           | -2.403340 | 2.431264  | 4.312949  |                |
| 1                                                           | -1.681813 | 2.250719  | 2.301422  |                |
| 6                                                           | -2.885154 | 1.767808  | 5.442283  |                |
| 1                                                           | -3.393289 | -0.143815 | 6.306251  |                |
| 1                                                           | -2.288988 | 3.511337  | 4.314678  |                |
| 1                                                           | -3.150333 | 2.329882  | 6.333705  |                |
| 6                                                           | -1.281009 | -2.253078 | 2.202002  |                |
| 6                                                           | 0.057194  | -2.499106 | 2.539309  |                |
| 6                                                           | -2.214100 | -3.291884 | 2.309508  |                |
| 6                                                           | 0.452830  | -3.756168 | 2.990073  |                |
| 1                                                           | 0.788766  | -1.704509 | 2.418956  |                |

|    |           |           |           |
|----|-----------|-----------|-----------|
| 6  | -1.814290 | -4.554848 | 2.749224  |
| 1  | -3.251642 | -3.114452 | 2.043247  |
| 6  | -0.481687 | -4.788205 | 3.091620  |
| 1  | 1.495045  | -3.937438 | 3.230903  |
| 1  | -2.544826 | -5.355986 | 2.823255  |
| 1  | -0.169991 | -5.773182 | 3.427835  |
| 6  | 2.157582  | -0.528378 | -2.265873 |
| 6  | 2.050984  | 0.822363  | -2.647577 |
| 6  | 3.302851  | -1.254598 | -2.611908 |
| 6  | 3.084134  | 1.430534  | -3.356402 |
| 1  | 1.181395  | 1.406885  | -2.350989 |
| 6  | 4.343202  | -0.633071 | -3.309464 |
| 1  | 3.395690  | -2.295169 | -2.320533 |
| 6  | 4.237490  | 0.707969  | -3.680067 |
| 1  | 2.994410  | 2.476344  | -3.635052 |
| 1  | 5.235099  | -1.200825 | -3.560794 |
| 1  | 5.050034  | 1.190026  | -4.216650 |
| 6  | 1.401941  | -2.815088 | -0.633148 |
| 6  | 2.560787  | -2.826939 | 0.160688  |
| 6  | 0.715854  | -4.013448 | -0.858220 |
| 6  | 3.045063  | -4.022799 | 0.684172  |
| 1  | 3.093194  | -1.904086 | 0.363754  |
| 6  | 1.187096  | -5.206137 | -0.307074 |
| 1  | -0.185732 | -4.017715 | -1.460910 |
| 6  | 2.355497  | -5.216315 | 0.454221  |
| 1  | 3.954064  | -4.011953 | 1.276967  |
| 1  | 0.640401  | -6.128871 | -0.479693 |
| 1  | 2.724192  | -6.148406 | 0.873435  |
| 46 | 0.120964  | 0.320171  | 0.356406  |
| 6  | -4.228114 | -3.941717 | -2.242504 |
| 1  | -5.202866 | -4.220164 | -1.826994 |
| 1  | -4.047508 | -4.535262 | -3.145611 |
| 1  | -3.458138 | -4.190467 | -1.506195 |
| 6  | -5.303591 | -2.125542 | -3.607471 |
| 1  | -5.160035 | -2.718768 | -4.515257 |
| 1  | -6.285516 | -2.394449 | -3.207459 |
| 1  | -5.318110 | -1.065836 | -3.881791 |
| 1  | 3.941133  | 3.066140  | 1.293932  |
| 6  | 1.761093  | 1.513629  | 0.542876  |
| 7  | 1.040628  | 2.398060  | 0.986122  |
| 13 | -0.067973 | 3.669996  | 0.011185  |
| 8  | -1.442009 | 4.045440  | 0.997442  |
| 8  | 1.042293  | 4.977234  | -0.318174 |

|   |           |           |           |
|---|-----------|-----------|-----------|
| 8 | -0.430076 | 2.699180  | -1.422275 |
| 6 | -2.244572 | 5.192018  | 1.161395  |
| 6 | 2.177820  | 4.827836  | -1.142323 |
| 6 | -1.649481 | 2.698055  | -2.139903 |
| 6 | 3.282314  | 5.754076  | -0.633488 |
| 1 | 3.517243  | 5.521070  | 0.410884  |
| 1 | 4.197395  | 5.655625  | -1.230898 |
| 1 | 2.945381  | 6.796267  | -0.677798 |
| 6 | 1.817371  | 5.110190  | -2.603723 |
| 1 | 1.041947  | 4.411622  | -2.932746 |
| 1 | 1.428653  | 6.130564  | -2.702718 |
| 1 | 2.691400  | 5.008033  | -3.261007 |
| 6 | -2.170124 | 6.123066  | -0.052490 |
| 1 | -2.560451 | 5.610273  | -0.941373 |
| 1 | -2.767183 | 7.029462  | 0.106600  |
| 1 | -1.134138 | 6.416027  | -0.250524 |
| 6 | -3.685097 | 4.751438  | 1.434569  |
| 1 | -4.084272 | 4.218424  | 0.563219  |
| 1 | -3.724737 | 4.072831  | 2.292375  |
| 1 | -4.331343 | 5.613438  | 1.640434  |
| 6 | -2.693857 | 1.855547  | -1.408636 |
| 1 | -2.326307 | 0.829335  | -1.318979 |
| 1 | -2.856396 | 2.248029  | -0.401497 |
| 1 | -3.652816 | 1.835373  | -1.941877 |
| 6 | -1.395606 | 2.167095  | -3.550894 |
| 1 | -1.051574 | 1.127863  | -3.508434 |
| 1 | -2.310261 | 2.199083  | -4.155367 |
| 1 | -0.626340 | 2.763817  | -4.053286 |
| 1 | 2.560195  | 3.790835  | -1.088955 |
| 1 | -1.882544 | 5.751922  | 2.040737  |
| 1 | -2.033310 | 3.729161  | -2.228423 |
| 6 | 3.174851  | 1.181897  | 0.412475  |
| 6 | 4.259837  | 2.117393  | 0.873209  |
| 6 | 3.986418  | 0.877281  | 1.694185  |
| 1 | 3.391506  | 0.526678  | -0.417151 |
| 1 | 5.164470  | 2.164303  | 0.274786  |
| 6 | 4.910980  | -0.301550 | 1.567445  |
| 6 | 5.077634  | -1.202345 | 2.628986  |
| 6 | 5.604793  | -0.563850 | 0.372033  |
| 6 | 5.904314  | -2.321341 | 2.504001  |
| 1 | 4.559925  | -1.036147 | 3.566357  |
| 6 | 6.421239  | -1.683646 | 0.242958  |
| 1 | 5.496976  | 0.096876  | -0.482189 |

|   |          |           |           |
|---|----------|-----------|-----------|
| 6 | 6.578340 | -2.571146 | 1.309911  |
| 1 | 6.016284 | -2.998230 | 3.346685  |
| 1 | 6.935405 | -1.863161 | -0.697066 |
| 1 | 7.217053 | -3.443819 | 1.209728  |
| 6 | 3.295314 | 1.073761  | 3.030244  |
| 1 | 2.675321 | 0.208459  | 3.291478  |
| 1 | 4.032775 | 1.224571  | 3.826158  |
| 1 | 2.641597 | 1.947744  | 3.003199  |

**IM5**

SCF Energy: -2082.28769650

|                                              |              |
|----------------------------------------------|--------------|
| Sum of electronic and zero-point Energies=   | -2081.428325 |
| Sum of electronic and thermal Energies=      | -2081.380059 |
| Sum of electronic and thermal Enthalpies=    | -2081.379115 |
| Sum of electronic and thermal Free Energies= | -2081.507381 |

Electronic energy in solution by single point calculation = -2081.20190946

|    |           |           |           |
|----|-----------|-----------|-----------|
| 46 | 1.024314  | 0.083762  | 0.105274  |
| 15 | -0.125733 | -2.000349 | -0.218825 |
| 6  | -1.979958 | -1.990011 | -0.049770 |
| 6  | -2.758628 | -0.855157 | 0.288839  |
| 6  | -2.653400 | -3.211352 | -0.252639 |
| 6  | -4.140254 | -1.030463 | 0.496243  |
| 6  | -2.298834 | 0.575114  | 0.347068  |
| 6  | -4.025013 | -3.354538 | -0.074536 |
| 1  | -2.092670 | -4.078860 | -0.562754 |
| 6  | -4.776310 | -2.254504 | 0.330485  |
| 1  | -4.722881 | -0.159166 | 0.775298  |
| 6  | -1.789159 | 1.142997  | 1.537581  |
| 6  | -2.577020 | 1.405085  | -0.766879 |
| 1  | -4.495044 | -4.318640 | -0.245311 |
| 1  | -5.846157 | -2.340468 | 0.496685  |
| 6  | -1.478702 | 2.508101  | 1.552123  |
| 6  | -2.275149 | 2.767359  | -0.688650 |
| 6  | -1.702011 | 3.335214  | 0.451612  |
| 1  | -1.061476 | 2.943657  | 2.454201  |
| 1  | -2.489931 | 3.402106  | -1.542900 |
| 6  | 0.185999  | -2.595174 | -2.024619 |
| 6  | 0.436112  | -3.350860 | 1.031484  |
| 6  | -0.176979 | -4.761736 | 0.914100  |
| 1  | 0.350680  | -5.405126 | 1.628992  |
| 1  | -1.231073 | -4.772760 | 1.197777  |
| 1  | -0.070059 | -5.218745 | -0.068657 |
| 6  | 1.966457  | -3.478557 | 0.899610  |

|   |           |           |           |
|---|-----------|-----------|-----------|
| 1 | 2.247867  | -3.975061 | -0.035180 |
| 1 | 2.468774  | -2.512602 | 0.962913  |
| 1 | 2.341149  | -4.095663 | 1.725191  |
| 6 | -0.809188 | -1.822826 | -2.907610 |
| 1 | -0.815710 | -0.758985 | -2.668284 |
| 1 | -0.524110 | -1.932954 | -3.961599 |
| 1 | -1.828121 | -2.201418 | -2.789710 |
| 6 | 1.623275  | -2.194799 | -2.408559 |
| 1 | 1.784245  | -1.124631 | -2.290508 |
| 1 | 2.369255  | -2.715018 | -1.802240 |
| 1 | 1.802326  | -2.459348 | -3.458749 |
| 6 | -1.702252 | 0.332268  | 2.823978  |
| 1 | -1.446459 | -0.692725 | 2.549408  |
| 6 | -3.257177 | 0.878354  | -2.029508 |
| 1 | -3.182462 | -0.212268 | -2.027228 |
| 6 | -1.369136 | 4.816367  | 0.508337  |
| 1 | -0.864811 | 4.999847  | 1.466351  |
| 6 | -3.078109 | 0.302272  | 3.521965  |
| 1 | -3.014659 | -0.273325 | 4.452756  |
| 1 | -3.398848 | 1.320069  | 3.774345  |
| 1 | -3.849635 | -0.152700 | 2.896610  |
| 6 | -0.646067 | 0.829347  | 3.818989  |
| 1 | -0.550725 | 0.108141  | 4.637836  |
| 1 | 0.337093  | 0.933150  | 3.359240  |
| 1 | -0.936766 | 1.787837  | 4.266009  |
| 6 | -2.648778 | 5.670523  | 0.481447  |
| 1 | -3.322035 | 5.396329  | 1.300560  |
| 1 | -2.407634 | 6.735826  | 0.574645  |
| 1 | -3.192713 | 5.530277  | -0.460224 |
| 6 | -0.405342 | 5.234328  | -0.615103 |
| 1 | 0.518331  | 4.647231  | -0.585458 |
| 1 | -0.860961 | 5.090321  | -1.601674 |
| 1 | -0.142082 | 6.294205  | -0.521795 |
| 6 | -2.616355 | 1.382643  | -3.333916 |
| 1 | -3.079729 | 0.882015  | -4.191544 |
| 1 | -2.763553 | 2.459916  | -3.468469 |
| 1 | -1.542403 | 1.187571  | -3.368370 |
| 6 | -4.753834 | 1.245884  | -2.026591 |
| 1 | -4.881369 | 2.334571  | -2.009444 |
| 1 | -5.246543 | 0.860284  | -2.927014 |
| 1 | -5.269587 | 0.834461  | -1.155361 |
| 6 | 0.042793  | -4.095827 | -2.326317 |
| 1 | 0.802725  | -4.692735 | -1.816842 |

|   |           |           |           |
|---|-----------|-----------|-----------|
| 1 | -0.943679 | -4.494761 | -2.082718 |
| 1 | 0.187568  | -4.241030 | -3.404737 |
| 6 | 0.058546  | -2.849443 | 2.438319  |
| 1 | -1.029573 | -2.797727 | 2.550814  |
| 1 | 0.433689  | -3.570680 | 3.175325  |
| 1 | 0.498272  | -1.883807 | 2.675470  |
| 6 | 0.703552  | 1.266165  | -1.775933 |
| 6 | 1.910731  | 2.061135  | 0.146470  |
| 1 | 0.701144  | 0.826383  | -2.768817 |
| 1 | -0.204782 | 1.779641  | -1.483719 |
| 1 | 2.838804  | 2.195710  | 0.689650  |
| 1 | 1.041591  | 2.586737  | 0.533399  |
| 6 | 1.936423  | 1.644364  | -1.205052 |
| 6 | 3.246541  | 1.373874  | -1.932838 |
| 6 | 4.414260  | 1.020434  | -1.041092 |
| 6 | 4.491945  | -0.244596 | -0.445996 |
| 6 | 5.407115  | 1.961980  | -0.753037 |
| 6 | 5.531244  | -0.558206 | 0.426071  |
| 1 | 3.713087  | -0.974247 | -0.641650 |
| 6 | 6.455244  | 1.649793  | 0.115073  |
| 1 | 5.356687  | 2.948184  | -1.209297 |
| 6 | 6.517414  | 0.388835  | 0.708657  |
| 1 | 5.558447  | -1.534230 | 0.900845  |
| 1 | 7.218262  | 2.392874  | 0.329944  |
| 1 | 7.324934  | 0.147063  | 1.393645  |
| 1 | 3.078927  | 0.588799  | -2.679118 |
| 1 | 3.482000  | 2.285176  | -2.499359 |
| 6 | 1.928607  | -0.276339 | 1.857629  |
| 7 | 2.569760  | -0.423543 | 2.825140  |

## IM6A

SCF Energy: -2678.18521594

Sum of electronic and zero-point Energies= -2677.477200

Sum of electronic and thermal Energies= -2677.431662

Sum of electronic and thermal Enthalpies= -2677.430718

Sum of electronic and thermal Free Energies= -2677.558057

Electronic energy in solution by single point calculation = -2677.03148373

|   |           |          |           |
|---|-----------|----------|-----------|
| 6 | -4.176100 | 0.090414 | -1.185413 |
| 6 | -2.899535 | 0.269460 | -0.633423 |
| 6 | -2.429718 | 1.581765 | -0.529218 |
| 6 | -3.138535 | 2.702935 | -0.967345 |
| 6 | -4.401250 | 2.482364 | -1.523408 |
| 6 | -4.916706 | 1.188041 | -1.623118 |

|    |           |           |           |
|----|-----------|-----------|-----------|
| 6  | -2.481066 | 4.070739  | -0.765432 |
| 6  | -0.983290 | 3.891006  | -1.030974 |
| 6  | -0.390081 | 2.709394  | -0.578706 |
| 6  | 0.974182  | 2.427092  | -0.695208 |
| 6  | 1.781274  | 3.408481  | -1.286681 |
| 6  | 1.220968  | 4.595618  | -1.759436 |
| 6  | -0.149248 | 4.834073  | -1.637542 |
| 1  | -4.578669 | -0.910298 | -1.289836 |
| 1  | -4.989977 | 3.319362  | -1.882490 |
| 1  | -5.901700 | 1.033898  | -2.053853 |
| 1  | 2.846835  | 3.238533  | -1.386327 |
| 1  | 1.857947  | 5.342520  | -2.223997 |
| 1  | -0.563506 | 5.763954  | -2.011432 |
| 8  | -1.173774 | 1.746593  | 0.022429  |
| 15 | 1.584402  | 0.793854  | -0.081010 |
| 15 | -1.743778 | -1.100359 | -0.202471 |
| 6  | 3.384490  | 0.986593  | -0.418442 |
| 6  | 4.318598  | 1.351558  | 0.558085  |
| 6  | 3.830206  | 0.722216  | -1.722902 |
| 6  | 5.675823  | 1.436448  | 0.237884  |
| 1  | 3.988084  | 1.560157  | 1.569961  |
| 6  | 5.181303  | 0.827095  | -2.046352 |
| 1  | 3.109264  | 0.420176  | -2.478656 |
| 6  | 6.109970  | 1.177389  | -1.062163 |
| 1  | 6.393303  | 1.707190  | 1.007612  |
| 1  | 5.512229  | 0.620106  | -3.060279 |
| 1  | 7.165932  | 1.243125  | -1.308303 |
| 6  | 1.469203  | 1.021852  | 1.739578  |
| 6  | 1.425111  | -0.123802 | 2.545546  |
| 6  | 1.424213  | 2.285883  | 2.343405  |
| 6  | 1.347943  | -0.007775 | 3.932270  |
| 1  | 1.427485  | -1.102523 | 2.076343  |
| 6  | 1.336663  | 2.399844  | 3.731077  |
| 1  | 1.455032  | 3.179882  | 1.728448  |
| 6  | 1.300063  | 1.253596  | 4.527365  |
| 1  | 1.298856  | -0.903197 | 4.542977  |
| 1  | 1.296562  | 3.384248  | 4.189659  |
| 1  | 1.226758  | 1.343678  | 5.607690  |
| 6  | -2.730168 | -2.575082 | -0.675686 |
| 6  | -2.385828 | -3.254386 | -1.850703 |
| 6  | -3.819478 | -3.026494 | 0.085320  |
| 6  | -3.130852 | -4.357894 | -2.269425 |
| 1  | -1.516244 | -2.932515 | -2.413857 |

|    |           |           |           |
|----|-----------|-----------|-----------|
| 6  | -4.558888 | -4.132282 | -0.331331 |
| 1  | -4.084326 | -2.511159 | 1.003734  |
| 6  | -4.216987 | -4.797491 | -1.512030 |
| 1  | -2.852317 | -4.882113 | -3.179230 |
| 1  | -5.399996 | -4.476220 | 0.264530  |
| 1  | -4.791609 | -5.661666 | -1.834113 |
| 6  | -1.814674 | -1.180619 | 1.633968  |
| 6  | -1.273171 | -2.326021 | 2.242520  |
| 6  | -2.310899 | -0.151022 | 2.439156  |
| 6  | -1.251389 | -2.443179 | 3.629684  |
| 1  | -0.873388 | -3.123504 | 1.621626  |
| 6  | -2.270533 | -0.263738 | 3.830557  |
| 1  | -2.733885 | 0.738442  | 1.985511  |
| 6  | -1.748164 | -1.409351 | 4.428912  |
| 1  | -0.840402 | -3.338861 | 4.087799  |
| 1  | -2.652762 | 0.546358  | 4.445462  |
| 1  | -1.723311 | -1.496468 | 5.511634  |
| 46 | 0.605051  | -1.201787 | -0.710803 |
| 6  | -2.660999 | 4.485038  | 0.720293  |
| 1  | -2.173046 | 5.448436  | 0.905464  |
| 1  | -3.725987 | 4.577876  | 0.960293  |
| 1  | -2.219188 | 3.742485  | 1.391018  |
| 6  | -3.102558 | 5.147183  | -1.662953 |
| 1  | -4.166074 | 5.269260  | -1.437462 |
| 1  | -2.628618 | 6.117251  | -1.486344 |
| 1  | -2.998650 | 4.897161  | -2.723755 |
| 6  | 3.381266  | -3.223620 | -0.829289 |
| 6  | 4.076568  | -2.505920 | 0.324133  |
| 1  | 4.100519  | -1.429835 | 0.153665  |
| 1  | 3.552977  | -2.706611 | 1.263340  |
| 1  | 5.101759  | -2.880129 | 0.408773  |
| 6  | 4.050247  | -2.916496 | -2.177537 |
| 1  | 5.099919  | -3.223615 | -2.130341 |
| 1  | 3.556139  | -3.471413 | -2.982547 |
| 1  | 4.000749  | -1.849846 | -2.406833 |
| 8  | 3.475035  | -4.620754 | -0.537429 |
| 1  | 2.832166  | -5.075179 | -1.105611 |
| 6  | 1.921954  | -2.840388 | -0.917709 |
| 7  | 0.845682  | -3.358427 | -1.115010 |

## IM6B

SCF Energy: -3502.16870208

Sum of electronic and zero-point Energies=

-3501.160766

|                                                             |           |           |           |                |
|-------------------------------------------------------------|-----------|-----------|-----------|----------------|
| Sum of electronic and thermal Energies=                     |           |           |           | -3501.095854   |
| Sum of electronic and thermal Enthalpies=                   |           |           |           | -3501.094910   |
| Sum of electronic and thermal Free Energies=                |           |           |           | -3501.263891   |
| Electronic energy in solution by single point calculation = |           |           |           | -3500.69949759 |
| 6                                                           | -3.126009 | 0.590179  | 3.117899  |                |
| 6                                                           | -2.584985 | 0.082154  | 1.925796  |                |
| 6                                                           | -2.093251 | -1.225829 | 1.960325  |                |
| 6                                                           | -2.046555 | -2.012100 | 3.117893  |                |
| 6                                                           | -2.555854 | -1.450559 | 4.289880  |                |
| 6                                                           | -3.107312 | -0.168552 | 4.285127  |                |
| 6                                                           | -1.500444 | -3.439757 | 3.003666  |                |
| 6                                                           | -0.385548 | -3.430038 | 1.956201  |                |
| 6                                                           | -0.538222 | -2.583698 | 0.862020  |                |
| 6                                                           | 0.360228  | -2.507538 | -0.202604 |                |
| 6                                                           | 1.472308  | -3.354910 | -0.176136 |                |
| 6                                                           | 1.664585  | -4.211794 | 0.908603  |                |
| 6                                                           | 0.750987  | -4.246708 | 1.964338  |                |
| 1                                                           | -3.542675 | 1.588416  | 3.141603  |                |
| 1                                                           | -2.533308 | -2.015228 | 5.214921  |                |
| 1                                                           | -3.516764 | 0.246255  | 5.200943  |                |
| 1                                                           | 2.194228  | -3.325181 | -0.982688 |                |
| 1                                                           | 2.540268  | -4.852218 | 0.934113  |                |
| 1                                                           | 0.930609  | -4.916930 | 2.797314  |                |
| 8                                                           | -1.627366 | -1.737277 | 0.775208  |                |
| 15                                                          | -0.001773 | -1.208190 | -1.435777 |                |
| 15                                                          | -2.446177 | 1.106369  | 0.388788  |                |
| 6                                                           | 1.320887  | -1.398709 | -2.687302 |                |
| 6                                                           | 1.036137  | -1.686047 | -4.030180 |                |
| 6                                                           | 2.652349  | -1.181092 | -2.298122 |                |
| 6                                                           | 2.069431  | -1.749597 | -4.966693 |                |
| 1                                                           | 0.013633  | -1.861271 | -4.346306 |                |
| 6                                                           | 3.679422  | -1.252523 | -3.236499 |                |
| 1                                                           | 2.923463  | -0.956474 | -1.274232 |                |
| 6                                                           | 3.391407  | -1.532390 | -4.573953 |                |
| 1                                                           | 1.837665  | -1.972490 | -6.004663 |                |
| 1                                                           | 4.695599  | -1.070558 | -2.901534 |                |
| 1                                                           | 4.191539  | -1.579664 | -5.307530 |                |
| 6                                                           | -1.501617 | -1.827732 | -2.286316 |                |
| 6                                                           | -2.251674 | -0.922244 | -3.048735 |                |
| 6                                                           | -1.911170 | -3.165039 | -2.213398 |                |
| 6                                                           | -3.383865 | -1.349526 | -3.739902 |                |
| 1                                                           | -1.951008 | 0.121062  | -3.092567 |                |
| 6                                                           | -3.056533 | -3.586387 | -2.888256 |                |

|    |           |           |           |
|----|-----------|-----------|-----------|
| 1  | -1.334477 | -3.874782 | -1.628972 |
| 6  | -3.792653 | -2.680797 | -3.654459 |
| 1  | -3.959264 | -0.637250 | -4.321124 |
| 1  | -3.370410 | -4.624349 | -2.819965 |
| 1  | -4.684263 | -3.010394 | -4.180201 |
| 6  | -2.836890 | 2.745721  | 1.133532  |
| 6  | -1.840911 | 3.324292  | 1.939906  |
| 6  | -4.060973 | 3.407710  | 0.977465  |
| 6  | -2.066434 | 4.544699  | 2.572986  |
| 1  | -0.893114 | 2.809580  | 2.071109  |
| 6  | -4.278019 | 4.638844  | 1.602822  |
| 1  | -4.841503 | 2.965543  | 0.368233  |
| 6  | -3.284676 | 5.208040  | 2.400173  |
| 1  | -1.288941 | 4.979706  | 3.193902  |
| 1  | -5.228016 | 5.147932  | 1.468511  |
| 1  | -3.457047 | 6.164129  | 2.885433  |
| 6  | -3.939269 | 0.666171  | -0.579641 |
| 6  | -4.269273 | 1.447536  | -1.700621 |
| 6  | -4.720691 | -0.451716 | -0.266788 |
| 6  | -5.389792 | 1.131630  | -2.465899 |
| 1  | -3.644460 | 2.295108  | -1.965100 |
| 6  | -5.823798 | -0.779881 | -1.056006 |
| 1  | -4.471554 | -1.065995 | 0.591207  |
| 6  | -6.168016 | 0.015755  | -2.148114 |
| 1  | -5.647298 | 1.751235  | -3.320579 |
| 1  | -6.417298 | -1.655677 | -0.810149 |
| 1  | -7.033876 | -0.235717 | -2.754021 |
| 46 | -0.335899 | 1.174703  | -0.766269 |
| 6  | -2.643246 | -4.349934 | 2.477900  |
| 1  | -2.281511 | -5.376520 | 2.354145  |
| 1  | -3.480933 | -4.354224 | 3.184108  |
| 1  | -3.010167 | -3.996956 | 1.509068  |
| 6  | -1.008183 | -3.974047 | 4.355015  |
| 1  | -1.825924 | -4.011487 | 5.080433  |
| 1  | -0.635621 | -4.996829 | 4.250292  |
| 1  | -0.205636 | -3.351768 | 4.763445  |
| 6  | -0.482673 | 3.215282  | -1.415491 |
| 6  | 0.006873  | 3.053565  | -2.851160 |
| 1  | 1.076506  | 2.842909  | -2.887112 |
| 1  | -0.522135 | 2.247635  | -3.372974 |
| 1  | -0.194859 | 3.987241  | -3.396691 |
| 6  | 0.308149  | 4.240929  | -0.620582 |
| 1  | 0.191246  | 5.228909  | -1.092251 |

|    |           |           |           |
|----|-----------|-----------|-----------|
| 1  | -0.049517 | 4.315553  | 0.409442  |
| 1  | 1.368560  | 3.986797  | -0.590252 |
| 8  | -1.839663 | 3.585402  | -1.513075 |
| 1  | -2.137213 | 3.886070  | -0.638056 |
| 6  | 1.633662  | 1.438734  | -0.688440 |
| 7  | 2.746723  | 1.456093  | -0.337555 |
| 13 | 4.228089  | 0.936657  | 0.806627  |
| 8  | 4.794650  | -0.429440 | -0.138380 |
| 8  | 5.281617  | 2.307585  | 0.959975  |
| 8  | 3.447011  | 0.536512  | 2.312620  |
| 6  | 5.771925  | -1.391180 | 0.187472  |
| 6  | 5.801610  | 3.048880  | -0.120104 |
| 6  | 2.361038  | -0.347933 | 2.441910  |
| 6  | 6.902316  | 2.266146  | -0.846052 |
| 1  | 6.508102  | 1.313616  | -1.214200 |
| 1  | 7.304567  | 2.833714  | -1.694935 |
| 1  | 7.723926  | 2.050624  | -0.151933 |
| 6  | 6.317631  | 4.386323  | 0.411111  |
| 1  | 5.512244  | 4.923327  | 0.923071  |
| 1  | 7.122502  | 4.212553  | 1.135079  |
| 1  | 6.704549  | 5.017763  | -0.398443 |
| 6  | 6.499595  | -1.065791 | 1.496402  |
| 1  | 5.791644  | -1.058024 | 2.333642  |
| 1  | 7.282928  | -1.803578 | 1.709668  |
| 1  | 6.963752  | -0.075466 | 1.438078  |
| 6  | 5.122366  | -2.777333 | 0.238217  |
| 1  | 4.357232  | -2.800473 | 1.022646  |
| 1  | 4.636395  | -3.001471 | -0.717795 |
| 1  | 5.861779  | -3.561406 | 0.444026  |
| 6  | 1.098845  | 0.435778  | 2.819311  |
| 1  | 1.282851  | 1.007751  | 3.736565  |
| 1  | 0.839859  | 1.138302  | 2.019896  |
| 1  | 0.244014  | -0.229318 | 2.985083  |
| 6  | 2.688656  | -1.410649 | 3.493591  |
| 1  | 2.908158  | -0.927340 | 4.452761  |
| 1  | 1.854029  | -2.109132 | 3.627762  |
| 1  | 3.571982  | -1.983174 | 3.191864  |
| 1  | 4.999455  | 3.261931  | -0.852105 |
| 1  | 6.523245  | -1.398920 | -0.621221 |
| 1  | 2.159421  | -0.871900 | 1.489758  |

## IM6

SCF Energy: -2082.29524946

|                                                             |           |           |           |               |
|-------------------------------------------------------------|-----------|-----------|-----------|---------------|
| Sum of electronic and zero-point Energies=                  |           |           |           | -2081.425766  |
| Sum of electronic and thermal Energies=                     |           |           |           | -2081.377204  |
| Sum of electronic and thermal Enthalpies=                   |           |           |           | -2081.376260  |
| Sum of electronic and thermal Free Energies=                |           |           |           | -2081.506181  |
| Electronic energy in solution by single point calculation = |           |           |           | -2081.2063888 |
| 46                                                          | -0.260673 | -0.371960 | -1.039265 |               |
| 15                                                          | -2.174465 | -1.152275 | -0.051868 |               |
| 6                                                           | -2.801908 | 0.204105  | 1.049966  |               |
| 6                                                           | -2.043396 | 1.392269  | 1.210186  |               |
| 6                                                           | -4.004403 | 0.076828  | 1.768402  |               |
| 6                                                           | -2.542701 | 2.398679  | 2.055849  |               |
| 6                                                           | -0.705538 | 1.695287  | 0.577782  |               |
| 6                                                           | -4.476561 | 1.081851  | 2.608033  |               |
| 1                                                           | -4.586426 | -0.829449 | 1.673749  |               |
| 6                                                           | -3.741754 | 2.257553  | 2.747630  |               |
| 1                                                           | -1.958822 | 3.306634  | 2.170583  |               |
| 6                                                           | 0.483502  | 1.508088  | 1.334475  |               |
| 6                                                           | -0.637403 | 2.427251  | -0.640346 |               |
| 1                                                           | -5.409840 | 0.944842  | 3.146832  |               |
| 1                                                           | -4.093509 | 3.056423  | 3.394225  |               |
| 6                                                           | 1.691486  | 2.010309  | 0.844510  |               |
| 6                                                           | 0.600879  | 2.911413  | -1.080590 |               |
| 6                                                           | 1.775353  | 2.712662  | -0.358209 |               |
| 1                                                           | 2.599159  | 1.849363  | 1.417442  |               |
| 1                                                           | 0.640805  | 3.462472  | -2.014250 |               |
| 6                                                           | -3.555869 | -1.451131 | -1.349022 |               |
| 6                                                           | -2.054117 | -2.694813 | 1.086472  |               |
| 6                                                           | -3.365835 | -3.408939 | 1.446985  |               |
| 1                                                           | -3.136599 | -4.241673 | 2.125003  |               |
| 1                                                           | -4.069652 | -2.756523 | 1.969581  |               |
| 1                                                           | -3.866354 | -3.833639 | 0.573715  |               |
| 6                                                           | -1.115903 | -3.704037 | 0.396395  |               |
| 1                                                           | -1.531115 | -4.096101 | -0.534472 |               |
| 1                                                           | -0.154315 | -3.242124 | 0.168188  |               |
| 1                                                           | -0.941744 | -4.553970 | 1.069392  |               |
| 6                                                           | -3.477566 | -0.276349 | -2.337502 |               |
| 1                                                           | -2.473770 | -0.179058 | -2.758588 |               |
| 1                                                           | -4.188050 | -0.443770 | -3.157705 |               |
| 1                                                           | -3.743006 | 0.668439  | -1.856754 |               |
| 6                                                           | -3.207671 | -2.736349 | -2.122288 |               |
| 1                                                           | -2.167070 | -2.721635 | -2.463185 |               |
| 1                                                           | -3.369233 | -3.639708 | -1.528329 |               |
| 1                                                           | -3.853151 | -2.807202 | -3.007047 |               |

|   |           |           |           |
|---|-----------|-----------|-----------|
| 6 | 0.468120  | 0.847209  | 2.705217  |
| 1 | -0.494663 | 0.345299  | 2.824947  |
| 6 | -1.893473 | 2.821751  | -1.403779 |
| 1 | -2.700272 | 2.162655  | -1.075632 |
| 6 | 3.103146  | 3.263709  | -0.844013 |
| 1 | 3.869493  | 2.927591  | -0.133385 |
| 6 | 0.571748  | 1.906482  | 3.818092  |
| 1 | 0.548947  | 1.430628  | 4.805889  |
| 1 | 1.509374  | 2.467739  | 3.732839  |
| 1 | -0.255466 | 2.621386  | 3.765798  |
| 6 | 1.574270  | -0.207290 | 2.863595  |
| 1 | 1.442733  | -0.756670 | 3.803212  |
| 1 | 1.559963  | -0.922902 | 2.038706  |
| 1 | 2.573022  | 0.240042  | 2.880458  |
| 6 | 3.102746  | 4.802490  | -0.830641 |
| 1 | 2.872881  | 5.189628  | 0.168167  |
| 1 | 4.080051  | 5.194598  | -1.136387 |
| 1 | 2.351434  | 5.198336  | -1.524199 |
| 6 | 3.477746  | 2.723231  | -2.233776 |
| 1 | 3.446913  | 1.631111  | -2.255795 |
| 1 | 2.773617  | 3.079049  | -2.994835 |
| 1 | 4.480420  | 3.063323  | -2.519989 |
| 6 | -1.741867 | 2.669940  | -2.925131 |
| 1 | -2.716792 | 2.773138  | -3.415138 |
| 1 | -1.084052 | 3.441072  | -3.341481 |
| 1 | -1.319178 | 1.695621  | -3.184864 |
| 6 | -2.307701 | 4.261163  | -1.044990 |
| 1 | -1.513891 | 4.968807  | -1.311142 |
| 1 | -3.216428 | 4.547809  | -1.587921 |
| 1 | -2.505633 | 4.362454  | 0.026533  |
| 6 | -5.004687 | -1.525317 | -0.839895 |
| 1 | -5.167848 | -2.312151 | -0.101752 |
| 1 | -5.324684 | -0.573162 | -0.409258 |
| 1 | -5.664322 | -1.735382 | -1.692121 |
| 6 | -1.369195 | -2.237900 | 2.383338  |
| 1 | -1.992989 | -1.547491 | 2.957703  |
| 1 | -1.162311 | -3.113538 | 3.011976  |
| 1 | -0.418219 | -1.748494 | 2.169633  |
| 6 | 1.590655  | -2.791050 | -2.357773 |
| 6 | 3.987929  | -3.386974 | -2.058510 |
| 1 | 0.773116  | -3.452772 | -2.053221 |
| 1 | 1.805801  | -2.979371 | -3.415482 |
| 1 | 4.880741  | -3.518561 | -1.453348 |

|   |          |           |           |
|---|----------|-----------|-----------|
| 1 | 4.088342 | -3.552730 | -3.127600 |
| 6 | 2.829024 | -3.020789 | -1.509688 |
| 6 | 2.666836 | -2.775773 | -0.015779 |
| 6 | 3.748731 | -1.925656 | 0.614684  |
| 6 | 4.046513 | -0.661222 | 0.086256  |
| 6 | 4.416980 | -2.348956 | 1.766724  |
| 6 | 4.991135 | 0.156121  | 0.702483  |
| 1 | 3.524572 | -0.318503 | -0.801597 |
| 6 | 5.359810 | -1.527706 | 2.390445  |
| 1 | 4.191746 | -3.327334 | 2.185057  |
| 6 | 5.649255 | -0.271102 | 1.859747  |
| 1 | 5.214891 | 1.130378  | 0.277204  |
| 1 | 5.867699 | -1.872698 | 3.287057  |
| 1 | 6.384530 | 0.369249  | 2.339219  |
| 1 | 1.705568 | -2.273312 | 0.150389  |
| 1 | 2.602108 | -3.738859 | 0.507818  |
| 6 | 1.161705 | -1.367706 | -2.186986 |
| 7 | 1.485610 | -0.214426 | -2.324527 |

#### IM7A

SCF Energy: -2678.16186408

|                                              |              |
|----------------------------------------------|--------------|
| Sum of electronic and zero-point Energies=   | -2677.454743 |
| Sum of electronic and thermal Energies=      | -2677.408907 |
| Sum of electronic and thermal Enthalpies=    | -2677.407963 |
| Sum of electronic and thermal Free Energies= | -2677.534841 |

Electronic energy in solution by single point calculation = -2677.00019916

|   |           |          |           |
|---|-----------|----------|-----------|
| 6 | -2.942095 | 2.264250 | -1.187648 |
| 6 | -1.816946 | 1.681123 | -0.581854 |
| 6 | -0.646050 | 2.446613 | -0.568837 |
| 6 | -0.537308 | 3.725561 | -1.128817 |
| 6 | -1.675002 | 4.254279 | -1.740369 |
| 6 | -2.867786 | 3.530974 | -1.762318 |
| 6 | 0.795484  | 4.469449 | -0.971627 |
| 6 | 1.913446  | 3.432930 | -1.093029 |
| 6 | 1.674964  | 2.178205 | -0.540272 |
| 6 | 2.591893  | 1.127362 | -0.554205 |
| 6 | 3.845805  | 1.364937 | -1.127342 |
| 6 | 4.127137  | 2.615740 | -1.680625 |
| 6 | 3.171017  | 3.635558 | -1.672607 |
| 1 | -3.876231 | 1.720613 | -1.226136 |
| 1 | -1.638707 | 5.236532 | -2.197934 |
| 1 | -3.748249 | 3.956269 | -2.234269 |
| 1 | 4.581848  | 0.568819 | -1.159733 |

|    |           |           |           |
|----|-----------|-----------|-----------|
| 1  | 5.098087  | 2.797026  | -2.131696 |
| 1  | 3.412391  | 4.591982  | -2.123274 |
| 8  | 0.456045  | 1.892995  | 0.045080  |
| 15 | 1.940239  | -0.479414 | 0.020171  |
| 15 | -1.854242 | -0.048585 | 0.105089  |
| 6  | 3.396764  | -1.585785 | -0.144011 |
| 6  | 4.293052  | -1.797180 | 0.914767  |
| 6  | 3.628417  | -2.216177 | -1.376582 |
| 6  | 5.401691  | -2.625921 | 0.742590  |
| 1  | 4.124805  | -1.315430 | 1.871984  |
| 6  | 4.743791  | -3.037078 | -1.545065 |
| 1  | 2.932473  | -2.080231 | -2.196941 |
| 6  | 5.630232  | -3.246244 | -0.487247 |
| 1  | 6.087192  | -2.785714 | 1.570409  |
| 1  | 4.909851  | -3.520585 | -2.503414 |
| 1  | 6.493276  | -3.893171 | -0.618401 |
| 6  | 1.797049  | -0.267515 | 1.836113  |
| 6  | 1.067584  | -1.231696 | 2.546467  |
| 6  | 2.385629  | 0.793864  | 2.533821  |
| 6  | 0.946137  | -1.147912 | 3.930946  |
| 1  | 0.584873  | -2.041751 | 2.005583  |
| 6  | 2.251193  | 0.884902  | 3.919974  |
| 1  | 2.952171  | 1.545798  | 1.993423  |
| 6  | 1.536163  | -0.087012 | 4.620478  |
| 1  | 0.368864  | -1.893753 | 4.467763  |
| 1  | 2.708995  | 1.714419  | 4.452150  |
| 1  | 1.428588  | -0.013160 | 5.698838  |
| 6  | -3.574421 | -0.492467 | -0.369006 |
| 6  | -3.761257 | -1.027720 | -1.652238 |
| 6  | -4.690029 | -0.240051 | 0.440047  |
| 6  | -5.044356 | -1.314635 | -2.113806 |
| 1  | -2.897733 | -1.245820 | -2.271083 |
| 6  | -5.973092 | -0.535987 | -0.022901 |
| 1  | -4.559849 | 0.190034  | 1.427025  |
| 6  | -6.152561 | -1.073026 | -1.299068 |
| 1  | -5.174046 | -1.740659 | -3.104148 |
| 1  | -6.832154 | -0.342078 | 0.613409  |
| 1  | -7.152172 | -1.304719 | -1.655891 |
| 6  | -1.958228 | 0.197817  | 1.925563  |
| 6  | -2.486966 | -0.835518 | 2.717190  |
| 6  | -1.459614 | 1.343604  | 2.557220  |
| 6  | -2.537887 | -0.712099 | 4.104000  |
| 1  | -2.881216 | -1.729423 | 2.246630  |

|    |           |           |           |
|----|-----------|-----------|-----------|
| 6  | -1.498319 | 1.457583  | 3.946813  |
| 1  | -1.035493 | 2.148356  | 1.970916  |
| 6  | -2.042298 | 0.436196  | 4.724274  |
| 1  | -2.965323 | -1.514424 | 4.699187  |
| 1  | -1.099235 | 2.349794  | 4.420342  |
| 1  | -2.075729 | 0.530892  | 5.805893  |
| 46 | -0.176005 | -1.423342 | -0.899651 |
| 6  | 0.846274  | 5.071053  | 0.458868  |
| 1  | 1.798655  | 5.588957  | 0.617217  |
| 1  | 0.028419  | 5.786437  | 0.598721  |
| 1  | 0.753036  | 4.288082  | 1.217515  |
| 6  | 0.949420  | 5.600222  | -1.996064 |
| 1  | 0.162103  | 6.348986  | -1.869285 |
| 1  | 1.902512  | 6.118046  | -1.854340 |
| 1  | 0.909016  | 5.221425  | -3.022258 |
| 6  | -1.216030 | -3.319896 | -1.017277 |
| 6  | -2.205958 | -3.482791 | 0.121431  |
| 1  | -1.726133 | -3.258753 | 1.078694  |
| 1  | -3.088876 | -2.859067 | -0.001146 |
| 1  | -2.539939 | -4.530828 | 0.150594  |
| 6  | -0.018331 | -4.259947 | -0.798248 |
| 1  | -0.401370 | -5.267306 | -0.571035 |
| 1  | 0.624414  | -4.316541 | -1.676151 |
| 1  | 0.597204  | -3.938545 | 0.049986  |
| 8  | -1.884215 | -3.559319 | -2.215388 |
| 1  | -1.233636 | -3.429401 | -2.930980 |
| 6  | 0.570023  | -2.028688 | -2.677529 |
| 7  | 0.849599  | -2.376864 | -3.761781 |

## IM7

SCF Energy: -1888.33083532

|                                              |              |
|----------------------------------------------|--------------|
| Sum of electronic and zero-point Energies=   | -1887.544546 |
| Sum of electronic and thermal Energies=      | -1887.499759 |
| Sum of electronic and thermal Enthalpies=    | -1887.498814 |
| Sum of electronic and thermal Free Energies= | -1887.618076 |

Electronic energy in solution by single point calculation = -1887.4080774

|    |           |           |           |
|----|-----------|-----------|-----------|
| 46 | 0.126756  | -1.161907 | 0.384419  |
| 6  | 0.221540  | -3.245971 | -0.094955 |
| 6  | -0.577059 | -3.552950 | -1.344251 |
| 1  | -1.644105 | -3.421506 | -1.192000 |
| 1  | -0.249071 | -2.941283 | -2.185372 |
| 1  | -0.395531 | -4.604450 | -1.611032 |
| 6  | -0.214667 | -4.083279 | 1.100436  |

|    |           |           |           |
|----|-----------|-----------|-----------|
| 1  | -0.083499 | -5.146023 | 0.843886  |
| 1  | 0.375670  | -3.862970 | 1.990204  |
| 1  | -1.269879 | -3.915593 | 1.326834  |
| 8  | 1.553690  | -3.431379 | -0.452626 |
| 1  | 2.107074  | -3.238596 | 0.328325  |
| 6  | 1.652672  | -1.615154 | 1.630799  |
| 7  | 2.511729  | -1.992128 | 2.333965  |
| 15 | -2.067465 | -0.194557 | -0.003193 |
| 6  | -1.763952 | 1.626494  | -0.252606 |
| 6  | -0.458930 | 2.162889  | -0.377705 |
| 6  | -2.850807 | 2.521894  | -0.288923 |
| 6  | -0.317910 | 3.543000  | -0.615984 |
| 6  | 0.846405  | 1.425904  | -0.237150 |
| 6  | -2.688030 | 3.887849  | -0.495698 |
| 1  | -3.853017 | 2.149556  | -0.147545 |
| 6  | -1.407541 | 4.403292  | -0.681336 |
| 1  | 0.686413  | 3.936321  | -0.735024 |
| 6  | 1.603023  | 1.592691  | 0.952467  |
| 6  | 1.463140  | 0.837715  | -1.376254 |
| 1  | -3.557364 | 4.538655  | -0.514409 |
| 1  | -1.255277 | 5.463726  | -0.859972 |
| 6  | 2.932621  | 1.154536  | 0.978021  |
| 6  | 2.783800  | 0.401013  | -1.286300 |
| 6  | 3.540333  | 0.556197  | -0.120187 |
| 1  | 3.504525  | 1.263010  | 1.893812  |
| 1  | 3.240640  | -0.064994 | -2.152782 |
| 6  | -3.332586 | -0.684509 | -1.367466 |
| 6  | -2.931056 | -0.271763 | 1.715257  |
| 6  | -4.394462 | 0.191921  | 1.774874  |
| 1  | -4.739658 | 0.112071  | 2.813612  |
| 1  | -4.515831 | 1.236419  | 1.479888  |
| 1  | -5.060505 | -0.424162 | 1.166897  |
| 6  | -2.838231 | -1.717772 | 2.236611  |
| 1  | -3.376492 | -2.431581 | 1.608512  |
| 1  | -1.794847 | -2.032404 | 2.304302  |
| 1  | -3.277583 | -1.763390 | 3.241301  |
| 6  | -2.521406 | -0.824260 | -2.668695 |
| 1  | -1.652027 | -1.469370 | -2.554547 |
| 1  | -3.162612 | -1.246515 | -3.452953 |
| 1  | -2.176711 | 0.153612  | -3.016884 |
| 6  | -3.956740 | -2.041249 | -0.984185 |
| 1  | -3.225085 | -2.762659 | -0.620613 |
| 1  | -4.721579 | -1.928964 | -0.211912 |

|   |           |           |           |
|---|-----------|-----------|-----------|
| 1 | -4.442122 | -2.474644 | -1.867250 |
| 6 | 1.040104  | 2.288087  | 2.185101  |
| 1 | -0.040146 | 2.385146  | 2.052777  |
| 6 | 0.740519  | 0.776576  | -2.711808 |
| 1 | -0.330506 | 0.816301  | -2.505361 |
| 6 | 4.974381  | 0.065576  | -0.049686 |
| 1 | 5.368969  | 0.356708  | 0.932354  |
| 6 | 1.615844  | 3.709916  | 2.323966  |
| 1 | 1.209649  | 4.200976  | 3.216179  |
| 1 | 2.706854  | 3.677735  | 2.422765  |
| 1 | 1.373801  | 4.329754  | 1.455548  |
| 6 | 1.290030  | 1.490071  | 3.476897  |
| 1 | 0.721294  | 1.930837  | 4.303962  |
| 1 | 1.005794  | 0.440901  | 3.368780  |
| 1 | 2.348183  | 1.506483  | 3.758929  |
| 6 | 5.853979  | 0.726316  | -1.124403 |
| 1 | 5.817946  | 1.819110  | -1.051820 |
| 1 | 6.897166  | 0.408304  | -1.014905 |
| 1 | 5.527136  | 0.446102  | -2.132745 |
| 6 | 5.036654  | -1.469490 | -0.139101 |
| 1 | 4.468981  | -1.921956 | 0.677950  |
| 1 | 4.615446  | -1.823975 | -1.087771 |
| 1 | 6.075962  | -1.814383 | -0.080918 |
| 6 | 1.021591  | -0.516173 | -3.490093 |
| 1 | 0.317628  | -0.617476 | -4.323837 |
| 1 | 2.031393  | -0.520257 | -3.915418 |
| 1 | 0.933131  | -1.393114 | -2.843746 |
| 6 | 1.087313  | 2.008231  | -3.569144 |
| 1 | 2.163917  | 2.043240  | -3.772184 |
| 1 | 0.559725  | 1.969847  | -4.529848 |
| 1 | 0.806659  | 2.937281  | -3.063941 |
| 6 | -4.488805 | 0.284703  | -1.674461 |
| 1 | -5.116050 | 0.498658  | -0.806910 |
| 1 | -4.130919 | 1.227142  | -2.093328 |
| 1 | -5.130640 | -0.185607 | -2.430866 |
| 6 | -2.097567 | 0.609822  | 2.659833  |
| 1 | -2.168990 | 1.669586  | 2.402513  |
| 1 | -2.463871 | 0.482755  | 3.686154  |
| 1 | -1.045691 | 0.314915  | 2.645045  |

## IM8A

SCF Energy: -2678.16625319

Sum of electronic and zero-point Energies=

-2677.461418

|                                                             |           |           |           |               |
|-------------------------------------------------------------|-----------|-----------|-----------|---------------|
| Sum of electronic and thermal Energies=                     |           |           |           | -2677.416275  |
| Sum of electronic and thermal Enthalpies=                   |           |           |           | -2677.415330  |
| Sum of electronic and thermal Free Energies=                |           |           |           | -2677.540951  |
| Electronic energy in solution by single point calculation = |           |           |           | -2676.9961198 |
| 6                                                           | -3.242978 | -2.211478 | -0.729273 |               |
| 6                                                           | -2.225455 | -1.248601 | -0.726213 |               |
| 6                                                           | -1.173678 | -1.421309 | -1.634075 |               |
| 6                                                           | -1.055514 | -2.521296 | -2.486489 |               |
| 6                                                           | -2.083230 | -3.467887 | -2.450330 |               |
| 6                                                           | -3.173302 | -3.304774 | -1.592822 |               |
| 6                                                           | 0.181118  | -2.583708 | -3.391559 |               |
| 6                                                           | 1.360083  | -2.036175 | -2.579009 |               |
| 6                                                           | 1.110397  | -0.939307 | -1.756513 |               |
| 6                                                           | 2.083318  | -0.303095 | -0.982549 |               |
| 6                                                           | 3.385157  | -0.811813 | -1.029615 |               |
| 6                                                           | 3.670497  | -1.918185 | -1.831769 |               |
| 6                                                           | 2.672281  | -2.522506 | -2.600609 |               |
| 1                                                           | -4.069274 | -2.123965 | -0.033688 |               |
| 1                                                           | -2.036426 | -4.342400 | -3.089710 |               |
| 1                                                           | -3.964684 | -4.048126 | -1.582201 |               |
| 1                                                           | 4.156237  | -0.373729 | -0.406524 |               |
| 1                                                           | 4.676921  | -2.324032 | -1.842429 |               |
| 1                                                           | 2.920681  | -3.385315 | -3.208753 |               |
| 8                                                           | -0.185313 | -0.458394 | -1.637200 |               |
| 15                                                          | 1.513387  | 0.978948  | 0.195852  |               |
| 15                                                          | -2.050497 | 0.042806  | 0.578568  |               |
| 6                                                           | 3.069051  | 1.646894  | 0.909217  |               |
| 6                                                           | 3.843085  | 2.566556  | 0.182385  |               |
| 6                                                           | 3.500946  | 1.228274  | 2.176379  |               |
| 6                                                           | 5.032334  | 3.059268  | 0.715703  |               |
| 1                                                           | 3.515529  | 2.900190  | -0.796666 |               |
| 6                                                           | 4.693550  | 1.727802  | 2.702549  |               |
| 1                                                           | 2.922942  | 0.482730  | 2.710791  |               |
| 6                                                           | 5.458999  | 2.641676  | 1.978538  |               |
| 1                                                           | 5.624697  | 3.769461  | 0.145221  |               |
| 1                                                           | 5.026921  | 1.390289  | 3.679682  |               |
| 1                                                           | 6.387474  | 3.025328  | 2.392753  |               |
| 6                                                           | 0.993227  | 2.368773  | -0.883721 |               |
| 6                                                           | 0.445243  | 3.498129  | -0.259867 |               |
| 6                                                           | 1.182966  | 2.380592  | -2.270494 |               |
| 6                                                           | 0.116186  | 4.626438  | -1.005759 |               |
| 1                                                           | 0.282051  | 3.492142  | 0.814331  |               |
| 6                                                           | 0.841728  | 3.508464  | -3.018857 |               |

|    |           |           |           |
|----|-----------|-----------|-----------|
| 1  | 1.613408  | 1.516290  | -2.764937 |
| 6  | 0.315339  | 4.635139  | -2.387964 |
| 1  | -0.308889 | 5.494012  | -0.510635 |
| 1  | 0.997715  | 3.507866  | -4.094304 |
| 1  | 0.054346  | 5.514613  | -2.969959 |
| 6  | -3.560894 | -0.165070 | 1.601784  |
| 6  | -3.476714 | -0.609785 | 2.925619  |
| 6  | -4.821754 | 0.136894  | 1.058542  |
| 6  | -4.634217 | -0.761713 | 3.692840  |
| 1  | -2.503000 | -0.833185 | 3.348111  |
| 6  | -5.974764 | -0.023839 | 1.822422  |
| 1  | -4.896479 | 0.500623  | 0.038283  |
| 6  | -5.882424 | -0.473450 | 3.143094  |
| 1  | -4.555569 | -1.103092 | 4.720962  |
| 1  | -6.944593 | 0.206776  | 1.390804  |
| 1  | -6.781997 | -0.592350 | 3.740427  |
| 6  | -2.434766 | 1.641721  | -0.235813 |
| 6  | -2.795557 | 2.719726  | 0.587781  |
| 6  | -2.409212 | 1.818274  | -1.622924 |
| 6  | -3.154274 | 3.943558  | 0.029591  |
| 1  | -2.817960 | 2.591332  | 1.666416  |
| 6  | -2.759440 | 3.049405  | -2.178140 |
| 1  | -2.122111 | 0.999930  | -2.271466 |
| 6  | -3.141274 | 4.109246  | -1.356985 |
| 1  | -3.444397 | 4.766936  | 0.676230  |
| 1  | -2.729673 | 3.178142  | -3.255873 |
| 1  | -3.418107 | 5.064284  | -1.794234 |
| 46 | -0.034912 | -0.360718 | 1.525301  |
| 6  | -0.051937 | -1.643441 | -4.604405 |
| 1  | 0.830710  | -1.639282 | -5.253235 |
| 1  | -0.915429 | -1.982558 | -5.187375 |
| 1  | -0.240049 | -0.617348 | -4.274911 |
| 6  | 0.446746  | -4.004387 | -3.902586 |
| 1  | -0.395046 | -4.364158 | -4.501743 |
| 1  | 1.326995  | -4.019087 | -4.551854 |
| 1  | 0.612264  | -4.704622 | -3.077585 |
| 6  | 2.000478  | -2.471063 | 2.318222  |
| 6  | 1.564836  | -3.062904 | 3.672046  |
| 1  | 1.831722  | -4.121830 | 3.766470  |
| 1  | 2.028145  | -2.502248 | 4.488554  |
| 1  | 0.477326  | -2.958434 | 3.749717  |
| 6  | 1.396796  | -3.292170 | 1.157077  |
| 1  | 0.305622  | -3.240362 | 1.223136  |

|   |           |           |          |
|---|-----------|-----------|----------|
| 1 | 1.710748  | -2.878391 | 0.197091 |
| 1 | 1.711164  | -4.341284 | 1.208412 |
| 8 | 1.727492  | -1.106961 | 2.251704 |
| 1 | -0.861135 | -1.455291 | 2.295700 |
| 6 | 3.489491  | -2.573480 | 2.193125 |
| 7 | 4.643080  | -2.610381 | 2.061050 |

### IM8

SCF Energy: -1988.77778664

|                                              |              |
|----------------------------------------------|--------------|
| Sum of electronic and zero-point Energies=   | -1987.930430 |
| Sum of electronic and thermal Energies=      | -1987.884546 |
| Sum of electronic and thermal Enthalpies=    | -1987.883602 |
| Sum of electronic and thermal Free Energies= | -1988.007855 |

Electronic energy in solution by single point calculation = -1987.72486796

|    |           |           |           |
|----|-----------|-----------|-----------|
| 46 | -0.279532 | -0.929611 | -0.310928 |
| 15 | -1.168399 | 1.346371  | -0.035412 |
| 6  | 0.254224  | 2.500700  | 0.282060  |
| 6  | 1.590706  | 2.040708  | 0.325570  |
| 6  | 0.019354  | 3.870248  | 0.512310  |
| 6  | 2.618472  | 2.969933  | 0.580765  |
| 6  | 2.090691  | 0.624774  | 0.184507  |
| 6  | 1.045857  | 4.772975  | 0.767721  |
| 1  | -0.993724 | 4.243395  | 0.487736  |
| 6  | 2.362939  | 4.318773  | 0.797663  |
| 1  | 3.639295  | 2.602509  | 0.620515  |
| 6  | 2.259541  | -0.157319 | 1.358126  |
| 6  | 2.756006  | 0.233453  | -1.005646 |
| 1  | 0.815756  | 5.820258  | 0.941131  |
| 1  | 3.182443  | 5.003714  | 0.995495  |
| 6  | 3.082329  | -1.284257 | 1.315587  |
| 6  | 3.569417  | -0.902602 | -0.994539 |
| 6  | 3.760029  | -1.668423 | 0.157305  |
| 1  | 3.222096  | -1.870071 | 2.220043  |
| 1  | 4.084251  | -1.184564 | -1.908051 |
| 6  | -1.879678 | 1.978277  | -1.701267 |
| 6  | -2.424255 | 1.697740  | 1.373448  |
| 6  | -3.273181 | 2.975214  | 1.261750  |
| 1  | -3.972867 | 2.995867  | 2.107305  |
| 1  | -2.680288 | 3.891021  | 1.319745  |
| 1  | -3.871354 | 3.005585  | 0.349381  |
| 6  | -3.365571 | 0.481212  | 1.425880  |
| 1  | -3.976006 | 0.375919  | 0.528167  |
| 1  | -2.802458 | -0.444019 | 1.554336  |

|   |           |           |           |
|---|-----------|-----------|-----------|
| 1 | -4.047407 | 0.592352  | 2.279078  |
| 6 | -0.933799 | 1.422127  | -2.778695 |
| 1 | -0.844362 | 0.332529  | -2.705550 |
| 1 | -1.324533 | 1.669379  | -3.774394 |
| 1 | 0.063821  | 1.857891  | -2.697289 |
| 6 | -3.261752 | 1.349136  | -1.920455 |
| 1 | -3.234701 | 0.272094  | -1.764394 |
| 1 | -4.029061 | 1.764297  | -1.263091 |
| 1 | -3.579511 | 1.535647  | -2.954763 |
| 6 | 1.672896  | 0.276515  | 2.691984  |
| 1 | 0.984110  | 1.099300  | 2.498124  |
| 6 | 2.682178  | 1.062812  | -2.278589 |
| 1 | 1.931563  | 1.842117  | -2.123179 |
| 6 | 4.703267  | -2.859078 | 0.167198  |
| 1 | 4.638881  | -3.315419 | 1.163871  |
| 6 | 2.778262  | 0.820990  | 3.614410  |
| 1 | 2.349603  | 1.172986  | 4.560086  |
| 1 | 3.517533  | 0.045250  | 3.844983  |
| 1 | 3.303481  | 1.659440  | 3.144830  |
| 6 | 0.875621  | -0.843130 | 3.376919  |
| 1 | 0.427256  | -0.473634 | 4.306695  |
| 1 | 0.076388  | -1.205842 | 2.723553  |
| 1 | 1.513973  | -1.694956 | 3.637186  |
| 6 | 6.157831  | -2.403066 | -0.045771 |
| 1 | 6.453188  | -1.662685 | 0.705466  |
| 1 | 6.845087  | -3.254520 | 0.019874  |
| 1 | 6.283523  | -1.945626 | -1.034182 |
| 6 | 4.306134  | -3.930059 | -0.862226 |
| 1 | 3.285830  | -4.285864 | -0.689456 |
| 1 | 4.353547  | -3.534374 | -1.883441 |
| 1 | 4.987105  | -4.787089 | -0.805103 |
| 6 | 2.248997  | 0.213674  | -3.485199 |
| 1 | 2.062089  | 0.852212  | -4.356249 |
| 1 | 3.026276  | -0.506522 | -3.764011 |
| 1 | 1.337813  | -0.349550 | -3.264321 |
| 6 | 4.017972  | 1.772862  | -2.561287 |
| 1 | 4.828109  | 1.046761  | -2.694198 |
| 1 | 3.947964  | 2.372881  | -3.476171 |
| 1 | 4.293866  | 2.438994  | -1.737811 |
| 6 | -1.968124 | 3.500263  | -1.888168 |
| 1 | -2.612054 | 3.983772  | -1.150302 |
| 1 | -0.983977 | 3.973865  | -1.853152 |
| 1 | -2.397052 | 3.703288  | -2.878218 |

|   |           |           |           |
|---|-----------|-----------|-----------|
| 6 | -1.644201 | 1.737560  | 2.697628  |
| 1 | -0.937059 | 2.570609  | 2.744690  |
| 1 | -2.356821 | 1.850935  | 3.524442  |
| 1 | -1.100874 | 0.805082  | 2.858824  |
| 6 | 0.005720  | -3.402575 | 0.656169  |
| 6 | 0.624055  | -2.768798 | -0.597588 |
| 1 | -0.150905 | -4.494213 | 0.656076  |
| 1 | 0.599375  | -3.134562 | 1.538021  |
| 1 | 0.295150  | -3.242127 | -1.525157 |
| 1 | 1.695266  | -2.577817 | -0.587469 |
| 6 | -1.222419 | -2.563541 | 0.493988  |
| 6 | -2.475231 | -3.011067 | 0.674143  |
| 1 | -2.564020 | -3.934701 | 1.260283  |
| 6 | -3.754258 | -2.500220 | 0.168221  |
| 6 | -4.914690 | -2.572130 | 0.958841  |
| 6 | -3.873777 | -2.005682 | -1.139520 |
| 6 | -6.141398 | -2.121819 | 0.477271  |
| 1 | -4.840486 | -2.971262 | 1.967624  |
| 6 | -5.104471 | -1.567916 | -1.628834 |
| 1 | -2.984835 | -1.982921 | -1.762894 |
| 6 | -6.241895 | -1.612845 | -0.820702 |
| 1 | -7.022298 | -2.171097 | 1.112125  |
| 1 | -5.176507 | -1.191663 | -2.646181 |
| 1 | -7.199824 | -1.270806 | -1.202649 |

## IM9B

SCF Energy: -2872.12962783

|                                              |              |
|----------------------------------------------|--------------|
| Sum of electronic and zero-point Energies=   | -2871.337357 |
| Sum of electronic and thermal Energies=      | -2871.288577 |
| Sum of electronic and thermal Enthalpies=    | -2871.287633 |
| Sum of electronic and thermal Free Energies= | -2871.421471 |

Electronic energy in solution by single point calculation = -2870.78994931

|   |           |           |           |
|---|-----------|-----------|-----------|
| 6 | 0.067368  | -3.978384 | -0.832928 |
| 6 | -0.380899 | -2.717465 | -0.410703 |
| 6 | -1.748765 | -2.589005 | -0.145011 |
| 6 | -2.677806 | -3.621181 | -0.316046 |
| 6 | -2.192148 | -4.853056 | -0.759526 |
| 6 | -0.829233 | -5.031641 | -1.004554 |
| 6 | -4.137601 | -3.326296 | 0.045086  |
| 6 | -4.426465 | -1.884036 | -0.379537 |
| 6 | -3.410348 | -0.948876 | -0.184446 |
| 6 | -3.535245 | 0.414914  | -0.464583 |
| 6 | -4.765875 | 0.855918  | -0.967011 |

|    |           |           |           |
|----|-----------|-----------|-----------|
| 6  | -5.802930 | -0.053178 | -1.184461 |
| 6  | -5.636641 | -1.409780 | -0.896111 |
| 1  | 1.118379  | -4.130421 | -1.046309 |
| 1  | -2.874087 | -5.682355 | -0.912047 |
| 1  | -0.464424 | -5.998300 | -1.339154 |
| 1  | -4.904164 | 1.906430  | -1.197508 |
| 1  | -6.750725 | 0.298399  | -1.581519 |
| 1  | -6.457518 | -2.096118 | -1.073206 |
| 8  | -2.185647 | -1.361773 | 0.304218  |
| 15 | -2.025700 | 1.444406  | -0.264185 |
| 15 | 0.709901  | -1.221945 | -0.329410 |
| 6  | -2.663190 | 3.133813  | -0.608774 |
| 6  | -3.569463 | 3.784738  | 0.242657  |
| 6  | -2.219782 | 3.782885  | -1.768435 |
| 6  | -4.038648 | 5.058625  | -0.071918 |
| 1  | -3.901374 | 3.294201  | 1.153023  |
| 6  | -2.693687 | 5.059072  | -2.081668 |
| 1  | -1.482061 | 3.297981  | -2.399727 |
| 6  | -3.603413 | 5.696089  | -1.237716 |
| 1  | -4.739750 | 5.556610  | 0.592544  |
| 1  | -2.341097 | 5.557564  | -2.980292 |
| 1  | -3.967191 | 6.691082  | -1.479863 |
| 6  | -1.813271 | 1.476138  | 1.565052  |
| 6  | -0.588311 | 1.946456  | 2.061104  |
| 6  | -2.795825 | 1.053101  | 2.467876  |
| 6  | -0.357897 | 2.007121  | 3.432897  |
| 1  | 0.188088  | 2.243635  | 1.361464  |
| 6  | -2.559015 | 1.103202  | 3.843001  |
| 1  | -3.745249 | 0.678574  | 2.097683  |
| 6  | -1.342158 | 1.582625  | 4.327785  |
| 1  | 0.600660  | 2.357663  | 3.802208  |
| 1  | -3.327439 | 0.767108  | 4.534351  |
| 1  | -1.156165 | 1.615736  | 5.397763  |
| 6  | 2.265456  | -1.943720 | -1.011877 |
| 6  | 2.467475  | -1.846358 | -2.396947 |
| 6  | 3.222819  | -2.605380 | -0.232427 |
| 6  | 3.601592  | -2.399081 | -2.991326 |
| 1  | 1.734436  | -1.316827 | -3.000987 |
| 6  | 4.361501  | -3.152583 | -0.825771 |
| 1  | 3.082484  | -2.687354 | 0.839870  |
| 6  | 4.554278  | -3.052047 | -2.204402 |
| 1  | 3.745341  | -2.313064 | -4.064818 |
| 1  | 5.100051  | -3.654311 | -0.207036 |

|    |           |           |           |
|----|-----------|-----------|-----------|
| 1  | 5.442347  | -3.477119 | -2.663911 |
| 6  | 1.100866  | -1.053006 | 1.457401  |
| 6  | 2.216349  | -0.275742 | 1.809542  |
| 6  | 0.302634  | -1.596343 | 2.469163  |
| 6  | 2.543431  | -0.074284 | 3.147410  |
| 1  | 2.843620  | 0.152755  | 1.035590  |
| 6  | 0.619348  | -1.372662 | 3.810159  |
| 1  | -0.567155 | -2.191540 | 2.216326  |
| 6  | 1.742142  | -0.620550 | 4.153531  |
| 1  | 3.426392  | 0.506670  | 3.396483  |
| 1  | -0.015504 | -1.789971 | 4.586581  |
| 1  | 1.989376  | -0.455942 | 5.198701  |
| 46 | 0.069410  | 0.810026  | -1.217188 |
| 6  | -4.282634 | -3.412074 | 1.588786  |
| 1  | -5.310759 | -3.175848 | 1.884881  |
| 1  | -4.038862 | -4.422050 | 1.936718  |
| 1  | -3.612027 | -2.704605 | 2.085274  |
| 6  | -5.105028 | -4.323193 | -0.603818 |
| 1  | -4.898137 | -5.341611 | -0.261936 |
| 1  | -6.136912 | -4.097688 | -0.318974 |
| 1  | -5.033395 | -4.301300 | -1.696039 |
| 1  | 3.941126  | 3.393237  | -2.627803 |
| 6  | 1.768382  | 1.758295  | -2.007681 |
| 7  | 0.937424  | 2.587536  | -2.294206 |
| 6  | 3.186155  | 1.446391  | -1.859498 |
| 6  | 4.260760  | 2.437147  | -2.224016 |
| 6  | 3.979991  | 2.178330  | -0.756812 |
| 1  | 3.416015  | 0.395383  | -1.964060 |
| 1  | 5.181967  | 2.044643  | -2.645602 |
| 6  | 4.957064  | 1.343052  | 0.023410  |
| 6  | 5.261726  | 1.656001  | 1.357668  |
| 6  | 5.587685  | 0.221098  | -0.540305 |
| 6  | 6.150252  | 0.876696  | 2.100422  |
| 1  | 4.798944  | 2.514227  | 1.830454  |
| 6  | 6.474147  | -0.557225 | 0.199184  |
| 1  | 5.377713  | -0.072225 | -1.563652 |
| 6  | 6.760877  | -0.236980 | 1.526815  |
| 1  | 6.362952  | 1.145956  | 3.131614  |
| 1  | 6.933233  | -1.424529 | -0.266082 |
| 1  | 7.449317  | -0.846924 | 2.104501  |
| 6  | 3.262629  | 3.275133  | 0.008299  |
| 1  | 2.719295  | 2.865584  | 0.867929  |
| 1  | 3.973300  | 4.025061  | 0.373176  |

|   |          |          |           |
|---|----------|----------|-----------|
| 1 | 2.534364 | 3.778686 | -0.629988 |
|---|----------|----------|-----------|

### IM9

SCF Energy: -1888.31552556

|                                            |              |
|--------------------------------------------|--------------|
| Sum of electronic and zero-point Energies= | -1887.533068 |
|--------------------------------------------|--------------|

|                                         |              |
|-----------------------------------------|--------------|
| Sum of electronic and thermal Energies= | -1887.488418 |
|-----------------------------------------|--------------|

|                                           |              |
|-------------------------------------------|--------------|
| Sum of electronic and thermal Enthalpies= | -1887.487474 |
|-------------------------------------------|--------------|

|                                              |              |
|----------------------------------------------|--------------|
| Sum of electronic and thermal Free Energies= | -1887.607881 |
|----------------------------------------------|--------------|

Electronic energy in solution by single point calculation = -1887.38389299

|    |           |           |           |
|----|-----------|-----------|-----------|
| 46 | 0.199863  | -0.832115 | 0.184965  |
| 6  | 0.598720  | -3.741685 | -0.429458 |
| 6  | -0.126737 | -5.102845 | -0.410636 |
| 1  | 0.547132  | -5.926460 | -0.669255 |
| 1  | -0.548775 | -5.283402 | 0.581436  |
| 1  | -0.943559 | -5.068035 | -1.138652 |
| 6  | 1.196974  | -3.475307 | -1.825185 |
| 1  | 0.376269  | -3.441311 | -2.549976 |
| 1  | 1.709236  | -2.508655 | -1.827325 |
| 1  | 1.905245  | -4.256673 | -2.123193 |
| 8  | -0.332248 | -2.773639 | -0.051544 |
| 1  | 1.677325  | -1.305333 | 0.170604  |
| 15 | -2.098825 | -0.113248 | -0.033127 |
| 6  | -1.905946 | 1.715867  | -0.065393 |
| 6  | -0.591914 | 2.234471  | -0.002571 |
| 6  | -2.990739 | 2.608242  | -0.098134 |
| 6  | -0.419261 | 3.628117  | 0.030500  |
| 6  | 0.682775  | 1.418394  | 0.069607  |
| 6  | -2.800265 | 3.987110  | -0.070752 |
| 1  | -4.000436 | 2.217668  | -0.142844 |
| 6  | -1.504380 | 4.499604  | -0.004565 |
| 1  | 0.589578  | 4.023949  | 0.095884  |
| 6  | 1.189348  | 1.017746  | 1.351891  |
| 6  | 1.610798  | 1.500091  | -1.033102 |
| 1  | -3.656279 | 4.655092  | -0.096560 |
| 1  | -1.338164 | 5.572532  | 0.026018  |
| 6  | 2.572025  | 0.719401  | 1.482839  |
| 6  | 2.949344  | 1.211708  | -0.824283 |
| 6  | 3.457849  | 0.824197  | 0.429220  |
| 1  | 2.943077  | 0.415185  | 2.456537  |
| 1  | 3.630267  | 1.276228  | -1.667292 |
| 6  | -2.775385 | -0.597708 | -1.745506 |
| 6  | -3.372593 | -0.550317 | 1.320607  |
| 6  | -4.852520 | -0.391469 | 0.936349  |

|   |           |           |           |
|---|-----------|-----------|-----------|
| 1 | -5.469395 | -0.675905 | 1.798606  |
| 1 | -5.111415 | 0.640191  | 0.680570  |
| 1 | -5.141525 | -1.036960 | 0.105085  |
| 6 | -3.098712 | -2.019384 | 1.709096  |
| 1 | -3.329317 | -2.714132 | 0.899842  |
| 1 | -2.050354 | -2.175116 | 1.975433  |
| 1 | -3.726605 | -2.281605 | 2.570702  |
| 6 | -1.605833 | -0.403614 | -2.724654 |
| 1 | -0.738987 | -1.000027 | -2.431228 |
| 1 | -1.919747 | -0.716499 | -3.728883 |
| 1 | -1.303530 | 0.644310  | -2.782982 |
| 6 | -3.129111 | -2.096448 | -1.723390 |
| 1 | -2.304324 | -2.681959 | -1.305048 |
| 1 | -4.038102 | -2.302657 | -1.152276 |
| 1 | -3.310218 | -2.430230 | -2.753541 |
| 6 | 0.390018  | 1.226859  | 2.630650  |
| 1 | -0.648357 | 1.396767  | 2.346136  |
| 6 | 1.160719  | 1.943345  | -2.417647 |
| 1 | 0.072116  | 2.041969  | -2.400227 |
| 6 | 4.906924  | 0.410801  | 0.596063  |
| 1 | 5.100568  | 0.333102  | 1.674155  |
| 6 | 0.873378  | 2.502362  | 3.345248  |
| 1 | 0.268617  | 2.688854  | 4.240205  |
| 1 | 1.920099  | 2.408848  | 3.655326  |
| 1 | 0.790100  | 3.375924  | 2.690199  |
| 6 | 0.438409  | 0.011512  | 3.567709  |
| 1 | -0.198601 | 0.182836  | 4.443219  |
| 1 | 0.099158  | -0.893978 | 3.054095  |
| 1 | 1.453141  | -0.179273 | 3.932544  |
| 6 | 5.893610  | 1.433919  | 0.014593  |
| 1 | 5.739339  | 2.428212  | 0.448364  |
| 1 | 6.925259  | 1.126462  | 0.219000  |
| 1 | 5.788681  | 1.521137  | -1.073124 |
| 6 | 5.118062  | -0.987416 | -0.017233 |
| 1 | 4.439184  | -1.722747 | 0.426437  |
| 1 | 4.932074  | -0.965454 | -1.098200 |
| 1 | 6.148690  | -1.326050 | 0.141457  |
| 6 | 1.528494  | 0.901983  | -3.489350 |
| 1 | 1.078927  | 1.170492  | -4.452285 |
| 1 | 2.613389  | 0.849293  | -3.633406 |
| 1 | 1.180567  | -0.094948 | -3.207953 |
| 6 | 1.738249  | 3.320861  | -2.790118 |
| 1 | 2.833765  | 3.297994  | -2.795812 |

|   |           |           |           |
|---|-----------|-----------|-----------|
| 1 | 1.401563  | 3.617801  | -3.790189 |
| 1 | 1.421169  | 4.093070  | -2.082941 |
| 6 | -3.956764 | 0.244391  | -2.250965 |
| 1 | -4.841186 | 0.171204  | -1.616304 |
| 1 | -3.683992 | 1.299807  | -2.343670 |
| 1 | -4.239498 | -0.111464 | -3.250258 |
| 6 | -3.099299 | 0.323369  | 2.556997  |
| 1 | -3.207463 | 1.391937  | 2.349974  |
| 1 | -3.818975 | 0.056537  | 3.340966  |
| 1 | -2.101881 | 0.143253  | 2.957883  |
| 6 | 1.727274  | -3.804814 | 0.551351  |
| 7 | 2.601673  | -3.836673 | 1.316424  |

### TS1A

SCF Energy: -2778.59378553

|                                              |              |
|----------------------------------------------|--------------|
| Sum of electronic and zero-point Energies=   | -2777.828492 |
| Sum of electronic and thermal Energies=      | -2777.781583 |
| Sum of electronic and thermal Enthalpies=    | -2777.780639 |
| Sum of electronic and thermal Free Energies= | -2777.908400 |

Electronic energy in solution by single point calculation = -2777.31278758

|    |           |           |           |
|----|-----------|-----------|-----------|
| 6  | 3.123147  | -2.041089 | 0.950162  |
| 6  | 2.071957  | -1.113786 | 0.930904  |
| 6  | 0.929725  | -1.439185 | 1.673437  |
| 6  | 0.794378  | -2.602871 | 2.434342  |
| 6  | 1.869295  | -3.495097 | 2.433918  |
| 6  | 3.019802  | -3.218052 | 1.692172  |
| 6  | -0.503262 | -2.782266 | 3.230314  |
| 6  | -1.649893 | -2.230762 | 2.377205  |
| 6  | -1.387505 | -1.100060 | 1.604078  |
| 6  | -2.335718 | -0.470434 | 0.791430  |
| 6  | -3.631515 | -1.000555 | 0.793796  |
| 6  | -3.933934 | -2.123339 | 1.565641  |
| 6  | -2.952309 | -2.737995 | 2.345107  |
| 1  | 4.018193  | -1.850545 | 0.369969  |
| 1  | 1.812384  | -4.416028 | 3.003621  |
| 1  | 3.844325  | -3.925082 | 1.694372  |
| 1  | -4.397908 | -0.540978 | 0.179799  |
| 1  | -4.942735 | -2.526050 | 1.556387  |
| 1  | -3.208179 | -3.616220 | 2.927744  |
| 8  | -0.121786 | -0.549217 | 1.615151  |
| 15 | -1.763529 | 0.912021  | -0.284358 |
| 15 | 2.000659  | 0.374286  | -0.164260 |
| 6  | -3.357799 | 1.437425  | -1.052211 |

|   |           |          |           |
|---|-----------|----------|-----------|
| 6 | -4.291837 | 2.257076 | -0.401556 |
| 6 | -3.648051 | 0.965461 | -2.340133 |
| 6 | -5.494914 | 2.588621 | -1.024826 |
| 1 | -4.076378 | 2.636098 | 0.592203  |
| 6 | -4.855593 | 1.291275 | -2.959305 |
| 1 | -2.915149 | 0.355657 | -2.856358 |
| 6 | -5.781713 | 2.103390 | -2.302971 |
| 1 | -6.209696 | 3.226462 | -0.511626 |
| 1 | -5.067800 | 0.917925 | -3.957649 |
| 1 | -6.719513 | 2.363328 | -2.786400 |
| 6 | -1.495184 | 2.254007 | 0.945451  |
| 6 | -0.766433 | 3.376370 | 0.529862  |
| 6 | -2.001769 | 2.216985 | 2.250839  |
| 6 | -0.573320 | 4.453330 | 1.391526  |
| 1 | -0.335733 | 3.388076 | -0.467621 |
| 6 | -1.793594 | 3.289335 | 3.119694  |
| 1 | -2.562328 | 1.350256 | 2.586947  |
| 6 | -1.085677 | 4.411744 | 2.689433  |
| 1 | 0.002756  | 5.311532 | 1.060575  |
| 1 | -2.187914 | 3.247672 | 4.131722  |
| 1 | -0.920678 | 5.245262 | 3.366556  |
| 6 | 3.687649  | 0.412546 | -0.913205 |
| 6 | 3.788853  | 0.445687 | -2.307416 |
| 6 | 4.860615  | 0.479122 | -0.143425 |
| 6 | 5.038287  | 0.513959 | -2.929596 |
| 1 | 2.874927  | 0.433953 | -2.892731 |
| 6 | 6.107378  | 0.541711 | -0.761462 |
| 1 | 4.791370  | 0.492089 | 0.940409  |
| 6 | 6.198344  | 0.554971 | -2.157460 |
| 1 | 5.101966  | 0.540043 | -4.014035 |
| 1 | 7.009251  | 0.589203 | -0.157145 |
| 1 | 7.171717  | 0.608001 | -2.637391 |
| 6 | 2.204489  | 1.787937 | 1.009983  |
| 6 | 2.690975  | 2.996347 | 0.484649  |
| 6 | 1.879260  | 1.728966 | 2.369540  |
| 6 | 2.869791  | 4.108380 | 1.303231  |
| 1 | 2.948478  | 3.058873 | -0.569089 |
| 6 | 2.047170  | 2.848298 | 3.186107  |
| 1 | 1.497627  | 0.812142 | 2.800025  |
| 6 | 2.548781  | 4.037826 | 2.660546  |
| 1 | 3.259653  | 5.030807 | 0.880781  |
| 1 | 1.783434  | 2.785840 | 4.238172  |
| 1 | 2.682387  | 4.905536 | 3.300555  |

|    |           |           |           |
|----|-----------|-----------|-----------|
| 46 | 0.128928  | 0.320124  | -1.558280 |
| 6  | -0.403784 | -1.922270 | 4.518829  |
| 1  | -1.327027 | -2.008065 | 5.102690  |
| 1  | 0.436907  | -2.257816 | 5.136340  |
| 1  | -0.252009 | -0.867097 | 4.272878  |
| 6  | -0.734830 | -4.246738 | 3.621963  |
| 1  | 0.080601  | -4.612536 | 4.252892  |
| 1  | -1.655029 | -4.349944 | 4.204125  |
| 1  | -0.807802 | -4.890616 | 2.739476  |
| 6  | -0.471187 | 0.343921  | -3.636100 |
| 6  | -0.779098 | -0.641403 | -4.450926 |
| 6  | 0.169032  | -1.266857 | -3.504155 |
| 1  | -0.365396 | 1.427581  | -3.735273 |
| 1  | -1.130857 | -0.827981 | -5.458606 |
| 6  | 1.541686  | -1.589829 | -4.078022 |
| 1  | 1.866847  | -0.791221 | -4.750621 |
| 1  | 2.316197  | -1.730912 | -3.322808 |
| 1  | 1.474923  | -2.518922 | -4.663572 |
| 6  | -0.346203 | -2.199579 | -2.440924 |
| 6  | -1.727749 | -2.409879 | -2.283537 |
| 6  | 0.526888  | -2.931534 | -1.615989 |
| 6  | -2.217496 | -3.294411 | -1.327399 |
| 1  | -2.414431 | -1.859981 | -2.918714 |
| 6  | 0.037351  | -3.825793 | -0.666707 |
| 1  | 1.598025  | -2.789330 | -1.696934 |
| 6  | -1.337152 | -4.009198 | -0.513111 |
| 1  | -3.289467 | -3.421479 | -1.212067 |
| 1  | 0.737370  | -4.366272 | -0.038032 |
| 1  | -1.720678 | -4.696085 | 0.235068  |

## TS1B

SCF Energy: -3502.16259746

|                                              |              |
|----------------------------------------------|--------------|
| Sum of electronic and zero-point Energies=   | -3501.158258 |
| Sum of electronic and thermal Energies=      | -3501.093779 |
| Sum of electronic and thermal Enthalpies=    | -3501.092835 |
| Sum of electronic and thermal Free Energies= | -3501.263206 |

Electronic energy in solution by single point calculation = -3500.69206

|   |           |          |          |
|---|-----------|----------|----------|
| 6 | -1.375933 | 3.196806 | 2.083906 |
| 6 | -1.566378 | 1.974056 | 1.425347 |
| 6 | -1.413281 | 0.801172 | 2.180683 |
| 6 | -1.041182 | 0.805127 | 3.529801 |
| 6 | -0.841537 | 2.044482 | 4.142242 |
| 6 | -1.018184 | 3.231319 | 3.429671 |

|    |           |           |           |
|----|-----------|-----------|-----------|
| 6  | -0.955975 | -0.542508 | 4.249270  |
| 6  | -0.430826 | -1.574048 | 3.248243  |
| 6  | -0.862284 | -1.470395 | 1.923392  |
| 6  | -0.542932 | -2.411205 | 0.933774  |
| 6  | 0.247323  | -3.502789 | 1.312930  |
| 6  | 0.711344  | -3.622224 | 2.622178  |
| 6  | 0.379315  | -2.664140 | 3.579579  |
| 1  | -1.485062 | 4.122356  | 1.530484  |
| 1  | -0.550210 | 2.090243  | 5.185298  |
| 1  | -0.865083 | 4.185965  | 3.923750  |
| 1  | 0.519538  | -4.247663 | 0.574267  |
| 1  | 1.340368  | -4.463537 | 2.895618  |
| 1  | 0.749506  | -2.775189 | 4.592340  |
| 8  | -1.651682 | -0.399924 | 1.548507  |
| 15 | -1.141311 | -2.127590 | -0.785192 |
| 15 | -1.891130 | 1.872999  | -0.384936 |
| 6  | -0.318866 | -3.482946 | -1.709108 |
| 6  | -0.995764 | -4.585235 | -2.242992 |
| 6  | 1.064935  | -3.354265 | -1.931294 |
| 6  | -0.301276 | -5.546290 | -2.983304 |
| 1  | -2.063134 | -4.695073 | -2.081812 |
| 6  | 1.755861  | -4.323172 | -2.654249 |
| 1  | 1.596826  | -2.497730 | -1.528506 |
| 6  | 1.072631  | -5.421567 | -3.186440 |
| 1  | -0.838120 | -6.395821 | -3.396721 |
| 1  | 2.826704  | -4.217830 | -2.804894 |
| 1  | 1.610090  | -6.173350 | -3.757517 |
| 6  | -2.903482 | -2.624117 | -0.649647 |
| 6  | -3.865470 | -1.835406 | -1.292170 |
| 6  | -3.317542 | -3.721065 | 0.120784  |
| 6  | -5.222039 | -2.140313 | -1.176476 |
| 1  | -3.546764 | -0.964221 | -1.856366 |
| 6  | -4.672870 | -4.027758 | 0.233387  |
| 1  | -2.578355 | -4.324968 | 0.639181  |
| 6  | -5.626259 | -3.237151 | -0.414894 |
| 1  | -5.956605 | -1.506330 | -1.662477 |
| 1  | -4.986739 | -4.877937 | 0.832932  |
| 1  | -6.682583 | -3.472317 | -0.316786 |
| 6  | -1.533140 | 3.588786  | -0.929388 |
| 6  | -0.200950 | 3.877593  | -1.266365 |
| 6  | -2.497831 | 4.601345  | -1.015032 |
| 6  | 0.160971  | 5.160329  | -1.673683 |
| 1  | 0.550759  | 3.095633  | -1.214123 |

|    |           |           |           |
|----|-----------|-----------|-----------|
| 6  | -2.134242 | 5.882410  | -1.434736 |
| 1  | -3.529761 | 4.387861  | -0.754414 |
| 6  | -0.806318 | 6.164475  | -1.762184 |
| 1  | 1.195397  | 5.366929  | -1.932253 |
| 1  | -2.888901 | 6.661333  | -1.502405 |
| 1  | -0.527487 | 7.162395  | -2.088900 |
| 6  | -3.717294 | 1.737603  | -0.501526 |
| 6  | -4.300585 | 1.782254  | -1.779177 |
| 6  | -4.531039 | 1.476226  | 0.606706  |
| 6  | -5.670281 | 1.589142  | -1.940198 |
| 1  | -3.673597 | 1.967836  | -2.648115 |
| 6  | -5.901293 | 1.263931  | 0.441670  |
| 1  | -4.094468 | 1.435857  | 1.599025  |
| 6  | -6.475525 | 1.324209  | -0.827698 |
| 1  | -6.109235 | 1.637003  | -2.933037 |
| 1  | -6.520080 | 1.054770  | 1.309808  |
| 1  | -7.542622 | 1.163557  | -0.952867 |
| 46 | -0.723852 | 0.086185  | -1.338048 |
| 6  | -2.396592 | -0.961599 | 4.651907  |
| 1  | -2.381710 | -1.941756 | 5.141148  |
| 1  | -2.823930 | -0.228043 | 5.344756  |
| 1  | -3.046051 | -1.026641 | 3.773815  |
| 6  | -0.086951 | -0.469468 | 5.511278  |
| 1  | -0.499846 | 0.250286  | 6.223983  |
| 1  | -0.068412 | -1.437093 | 6.020815  |
| 1  | 0.940536  | -0.177430 | 5.276470  |
| 6  | 1.883020  | 1.090559  | -3.100504 |
| 6  | 0.652378  | 1.440613  | -3.893494 |
| 1  | -0.014589 | 0.580094  | -3.987624 |
| 1  | 0.121933  | 2.278685  | -3.441219 |
| 1  | 0.980278  | 1.740472  | -4.901146 |
| 6  | 2.652488  | -0.134944 | -3.541725 |
| 1  | 3.103146  | 0.101484  | -4.517676 |
| 1  | 3.452415  | -0.383111 | -2.844273 |
| 1  | 1.990355  | -0.994315 | -3.662155 |
| 8  | 2.536109  | 2.106842  | -2.624296 |
| 1  | 3.388504  | 1.815652  | -1.986709 |
| 6  | 1.264504  | 0.183068  | -1.237416 |
| 7  | 2.121480  | -0.032822 | -0.443589 |
| 13 | 3.881526  | 0.235228  | 0.164494  |
| 8  | 4.907347  | -1.136123 | -0.124747 |
| 8  | 4.330048  | 1.467894  | -1.087095 |
| 8  | 3.785341  | 0.795342  | 1.805376  |

|   |          |           |           |
|---|----------|-----------|-----------|
| 6 | 5.117403 | -2.253442 | 0.715390  |
| 6 | 5.657602 | 1.903448  | -1.413512 |
| 6 | 2.663355 | 1.434976  | 2.381146  |
| 6 | 6.256420 | 0.979596  | -2.472926 |
| 1 | 5.636234 | 0.975536  | -3.376480 |
| 1 | 7.264825 | 1.306179  | -2.753439 |
| 1 | 6.305661 | -0.040076 | -2.077930 |
| 6 | 6.515756 | 1.968854  | -0.152906 |
| 1 | 6.031550 | 2.583595  | 0.611661  |
| 1 | 6.662969 | 0.962425  | 0.254469  |
| 1 | 7.499997 | 2.394643  | -0.379603 |
| 6 | 5.994800 | -1.870283 | 1.910831  |
| 1 | 5.484469 | -1.115293 | 2.518797  |
| 1 | 6.217236 | -2.742199 | 2.539014  |
| 1 | 6.942852 | -1.446648 | 1.561136  |
| 6 | 3.788198 | -2.864991 | 1.167758  |
| 1 | 3.228618 | -2.154434 | 1.787485  |
| 1 | 3.167158 | -3.121029 | 0.303060  |
| 1 | 3.947729 | -3.775767 | 1.758645  |
| 6 | 2.415669 | 2.804204  | 1.740259  |
| 1 | 3.299183 | 3.441806  | 1.866492  |
| 1 | 2.224027 | 2.700170  | 0.666978  |
| 1 | 1.550285 | 3.301210  | 2.191615  |
| 6 | 2.900338 | 1.553993  | 3.885544  |
| 1 | 3.790884 | 2.163761  | 4.078360  |
| 1 | 2.042210 | 2.015786  | 4.386727  |
| 1 | 3.071755 | 0.561434  | 4.316959  |
| 1 | 5.557889 | 2.916964  | -1.827548 |
| 1 | 5.655145 | -3.007397 | 0.118608  |
| 1 | 1.761531 | 0.819656  | 2.222368  |

## TS1

SCF Energy: -1988.77201778

|                                              |              |
|----------------------------------------------|--------------|
| Sum of electronic and zero-point Energies=   | -1987.927683 |
| Sum of electronic and thermal Energies=      | -1987.881603 |
| Sum of electronic and thermal Enthalpies=    | -1987.880659 |
| Sum of electronic and thermal Free Energies= | -1988.006505 |

Electronic energy in solution by single point calculation = -1987.7321332

|    |          |           |           |
|----|----------|-----------|-----------|
| 46 | 0.419728 | -1.409678 | 0.357859  |
| 15 | 2.646319 | -0.969935 | 0.006275  |
| 6  | 3.038609 | 0.816289  | -0.349992 |
| 6  | 2.038358 | 1.822563  | -0.405179 |
| 6  | 4.366837 | 1.193275  | -0.627386 |

|   |           |           |           |
|---|-----------|-----------|-----------|
| 6 | 2.426261  | 3.138961  | -0.719551 |
| 6 | 0.555864  | 1.662498  | -0.184117 |
| 6 | 4.728888  | 2.500188  | -0.938624 |
| 1 | 5.143405  | 0.442546  | -0.604917 |
| 6 | 3.746705  | 3.486696  | -0.982680 |
| 1 | 1.652249  | 3.899118  | -0.762207 |
| 6 | -0.301926 | 1.497139  | -1.295683 |
| 6 | -0.003115 | 1.914388  | 1.086316  |
| 1 | 5.767760  | 2.740298  | -1.146697 |
| 1 | 4.001836  | 4.514680  | -1.224100 |
| 6 | -1.683461 | 1.550945  | -1.103644 |
| 6 | -1.395477 | 1.944122  | 1.232721  |
| 6 | -2.258770 | 1.764322  | 0.152948  |
| 1 | -2.341675 | 1.422533  | -1.959586 |
| 1 | -1.809974 | 2.130508  | 2.216740  |
| 6 | 3.674062  | -1.402475 | 1.569263  |
| 6 | 3.369507  | -1.928803 | -1.501049 |
| 6 | 4.888283  | -2.161884 | -1.538857 |
| 1 | 5.133472  | -2.722659 | -2.450510 |
| 1 | 5.459895  | -1.231419 | -1.575753 |
| 1 | 5.242204  | -2.754092 | -0.692059 |
| 6 | 2.665794  | -3.301726 | -1.538487 |
| 1 | 2.923369  | -3.925688 | -0.679707 |
| 1 | 1.578358  | -3.181893 | -1.543574 |
| 1 | 2.970571  | -3.837325 | -2.447841 |
| 6 | 2.939389  | -0.749063 | 2.751287  |
| 1 | 1.895069  | -1.069456 | 2.790235  |
| 1 | 3.432129  | -1.034435 | 3.690245  |
| 1 | 2.961317  | 0.341102  | 2.681411  |
| 6 | 3.611273  | -2.928845 | 1.761901  |
| 1 | 2.579744  | -3.290530 | 1.694248  |
| 1 | 4.216818  | -3.468542 | 1.029089  |
| 1 | 3.999669  | -3.180448 | 2.757350  |
| 6 | 0.240291  | 1.303448  | -2.703682 |
| 1 | 1.308731  | 1.092392  | -2.623197 |
| 6 | 0.870716  | 2.238507  | 2.288608  |
| 1 | 1.887631  | 1.913703  | 2.054869  |
| 6 | -3.773668 | 1.838279  | 0.275073  |
| 1 | -4.183699 | 1.000422  | -0.302894 |
| 6 | 0.089670  | 2.593464  | -3.528876 |
| 1 | 0.495755  | 2.458154  | -4.538590 |
| 1 | -0.965323 | 2.876966  | -3.621664 |
| 1 | 0.621031  | 3.426053  | -3.056409 |

|   |           |           |           |
|---|-----------|-----------|-----------|
| 6 | -0.415534 | 0.113355  | -3.422631 |
| 1 | 0.079201  | -0.072453 | -4.383077 |
| 1 | -0.346714 | -0.795083 | -2.815103 |
| 1 | -1.475164 | 0.300363  | -3.630641 |
| 6 | -4.297033 | 3.139970  | -0.362003 |
| 1 | -3.979170 | 3.230962  | -1.405918 |
| 1 | -5.392594 | 3.170444  | -0.334735 |
| 1 | -3.915983 | 4.013561  | 0.180878  |
| 6 | -4.293540 | 1.701445  | 1.709233  |
| 1 | -3.895189 | 0.804116  | 2.191612  |
| 1 | -4.023402 | 2.571687  | 2.320064  |
| 1 | -5.385686 | 1.625152  | 1.703058  |
| 6 | 0.427903  | 1.513325  | 3.568164  |
| 1 | 1.170135  | 1.656710  | 4.361739  |
| 1 | -0.527458 | 1.898422  | 3.941850  |
| 1 | 0.317024  | 0.439646  | 3.394318  |
| 6 | 0.920180  | 3.759783  | 2.523058  |
| 1 | -0.083352 | 4.152805  | 2.724133  |
| 1 | 1.558657  | 3.998950  | 3.382136  |
| 1 | 1.317783  | 4.282156  | 1.647514  |
| 6 | 5.136143  | -0.931233 | 1.619517  |
| 1 | 5.745112  | -1.320061 | 0.801496  |
| 1 | 5.206137  | 0.159495  | 1.616879  |
| 1 | 5.585219  | -1.284836 | 2.557030  |
| 6 | 2.957326  | -1.162521 | -2.768322 |
| 1 | 3.440805  | -0.184215 | -2.837775 |
| 1 | 3.243643  | -1.746978 | -3.652256 |
| 1 | 1.876194  | -1.018021 | -2.801410 |
| 6 | -1.710036 | -1.784251 | -0.121387 |
| 6 | -1.329934 | -1.881136 | 1.674010  |
| 1 | -1.736688 | -0.857862 | -0.695714 |
| 1 | -1.526532 | -2.697192 | -0.692086 |
| 1 | -1.098832 | -1.011987 | 2.291378  |
| 1 | -0.938430 | -2.835127 | 2.029978  |
| 6 | -2.628260 | -1.884374 | 1.006864  |
| 6 | -3.925470 | -1.789752 | 1.304789  |
| 6 | -5.021547 | -1.580724 | 0.354980  |
| 6 | -4.842346 | -1.614419 | -1.041966 |
| 6 | -6.304284 | -1.284069 | 0.848297  |
| 6 | -5.902880 | -1.345725 | -1.902569 |
| 1 | -3.866628 | -1.851649 | -1.450640 |
| 6 | -7.364855 | -1.013466 | -0.013763 |
| 1 | -6.460175 | -1.254563 | 1.923847  |

|   |           |           |           |
|---|-----------|-----------|-----------|
| 6 | -7.168777 | -1.039549 | -1.395306 |
| 1 | -5.741406 | -1.375708 | -2.976850 |
| 1 | -8.344894 | -0.780875 | 0.393849  |
| 1 | -7.992805 | -0.827244 | -2.070383 |
| 1 | -4.208310 | -1.812071 | 2.357063  |

**TS2A**

SCF Energy: -3065.26346594

|                                              |              |
|----------------------------------------------|--------------|
| Sum of electronic and zero-point Energies=   | -3064.389118 |
| Sum of electronic and thermal Energies=      | -3064.334896 |
| Sum of electronic and thermal Enthalpies=    | -3064.333952 |
| Sum of electronic and thermal Free Energies= | -3064.477589 |

Electronic energy in solution by single point calculation = -3063.84287831

|    |           |           |           |
|----|-----------|-----------|-----------|
| 6  | -2.429800 | -3.042670 | 0.669684  |
| 6  | -1.768812 | -1.821190 | 0.845148  |
| 6  | -2.555667 | -0.665568 | 0.849498  |
| 6  | -3.939549 | -0.656547 | 0.698548  |
| 6  | -4.566509 | -1.895498 | 0.543600  |
| 6  | -3.817279 | -3.073300 | 0.529991  |
| 6  | -4.634485 | 0.708033  | 0.719469  |
| 6  | -3.718579 | 1.697849  | -0.012561 |
| 6  | -2.342092 | 1.567029  | 0.185640  |
| 6  | -1.381720 | 2.421355  | -0.370716 |
| 6  | -1.856879 | 3.493581  | -1.137434 |
| 6  | -3.225019 | 3.649154  | -1.367299 |
| 6  | -4.147741 | 2.756000  | -0.818712 |
| 1  | -1.859887 | -3.962220 | 0.612880  |
| 1  | -5.641222 | -1.947790 | 0.410225  |
| 1  | -4.319262 | -4.025098 | 0.385609  |
| 1  | -1.156698 | 4.200464  | -1.565648 |
| 1  | -3.575105 | 4.477918  | -1.975373 |
| 1  | -5.205356 | 2.896330  | -1.013385 |
| 8  | -1.875060 | 0.533705  | 0.966539  |
| 15 | 0.404271  | 2.017036  | -0.086245 |
| 15 | 0.042030  | -1.545919 | 0.838644  |
| 6  | 1.274286  | 3.365707  | -0.981652 |
| 6  | 2.173114  | 4.224059  | -0.335811 |
| 6  | 1.100181  | 3.487315  | -2.371539 |
| 6  | 2.881654  | 5.182148  | -1.063586 |
| 1  | 2.322499  | 4.143866  | 0.734970  |
| 6  | 1.796521  | 4.455016  | -3.092549 |
| 1  | 0.410719  | 2.826762  | -2.887100 |
| 6  | 2.694728  | 5.303125  | -2.440254 |

|    |           |           |           |
|----|-----------|-----------|-----------|
| 1  | 3.577703  | 5.837897  | -0.548038 |
| 1  | 1.644756  | 4.539248  | -4.164975 |
| 1  | 3.245295  | 6.051286  | -3.003341 |
| 6  | 0.623541  | 2.475229  | 1.672709  |
| 6  | 1.784544  | 2.042207  | 2.326178  |
| 6  | -0.299469 | 3.277981  | 2.357365  |
| 6  | 2.025415  | 2.429403  | 3.644065  |
| 1  | 2.497966  | 1.404845  | 1.814141  |
| 6  | -0.062184 | 3.643807  | 3.681409  |
| 1  | -1.199129 | 3.620141  | 1.856752  |
| 6  | 1.103700  | 3.224766  | 4.325028  |
| 1  | 2.926467  | 2.085677  | 4.141492  |
| 1  | -0.785058 | 4.261662  | 4.207439  |
| 1  | 1.288824  | 3.512025  | 5.356526  |
| 6  | 0.837517  | -3.196307 | 0.842953  |
| 6  | 1.975103  | -3.384929 | 0.048209  |
| 6  | 0.438582  | -4.210527 | 1.729407  |
| 6  | 2.679093  | -4.590233 | 0.110402  |
| 1  | 2.335853  | -2.596171 | -0.606365 |
| 6  | 1.135535  | -5.415364 | 1.777121  |
| 1  | -0.401563 | -4.047359 | 2.397580  |
| 6  | 2.255865  | -5.609076 | 0.962393  |
| 1  | 3.558273  | -4.721230 | -0.514089 |
| 1  | 0.815862  | -6.197520 | 2.460199  |
| 1  | 2.801985  | -6.547474 | 1.006028  |
| 6  | 0.439358  | -1.046340 | 2.569915  |
| 6  | 1.768764  | -1.204822 | 2.991022  |
| 6  | -0.508259 | -0.558495 | 3.476690  |
| 6  | 2.135781  | -0.897603 | 4.298202  |
| 1  | 2.521055  | -1.560033 | 2.296719  |
| 6  | -0.133766 | -0.241358 | 4.782716  |
| 1  | -1.541356 | -0.434744 | 3.178173  |
| 6  | 1.185090  | -0.416521 | 5.199725  |
| 1  | 3.169641  | -1.025643 | 4.605859  |
| 1  | -0.879329 | 0.139907  | 5.474860  |
| 1  | 1.471830  | -0.172320 | 6.218865  |
| 46 | 0.670157  | -0.177686 | -0.967391 |
| 6  | -4.755585 | 1.174180  | 2.195678  |
| 1  | -5.228682 | 2.161303  | 2.243072  |
| 1  | -5.363578 | 0.464396  | 2.767268  |
| 1  | -3.771113 | 1.243532  | 2.667489  |
| 6  | -6.035243 | 0.645255  | 0.099825  |
| 1  | -6.672132 | -0.042257 | 0.664222  |

|   |           |           |           |
|---|-----------|-----------|-----------|
| 1 | -6.519025 | 1.625753  | 0.134384  |
| 1 | -6.000486 | 0.308013  | -0.940522 |
| 6 | 1.810052  | 0.240119  | -2.797317 |
| 6 | 0.547403  | -0.174995 | -3.220675 |
| 6 | 0.024101  | -1.439973 | -2.748356 |
| 1 | 2.049245  | 1.266457  | -3.089285 |
| 1 | -0.148155 | 0.489951  | -3.745688 |
| 6 | 0.849902  | -2.696698 | -2.929009 |
| 1 | 1.915959  | -2.485373 | -2.883960 |
| 1 | 0.615876  | -3.457392 | -2.180534 |
| 1 | 0.631322  | -3.126698 | -3.918355 |
| 6 | -1.453656 | -1.601625 | -2.767599 |
| 6 | -2.306025 | -0.484804 | -2.642575 |
| 6 | -2.058365 | -2.859891 | -2.941347 |
| 6 | -3.686714 | -0.614194 | -2.737323 |
| 1 | -1.881819 | 0.493177  | -2.446847 |
| 6 | -3.443657 | -2.991047 | -3.023602 |
| 1 | -1.440607 | -3.745775 | -3.030487 |
| 6 | -4.266816 | -1.869272 | -2.932757 |
| 1 | -4.308376 | 0.270970  | -2.642274 |
| 1 | -3.879650 | -3.976705 | -3.163487 |
| 1 | -5.346347 | -1.972094 | -3.000443 |
| 6 | 4.779483  | -0.876421 | -1.399524 |
| 6 | 5.849095  | -1.957230 | -1.163647 |
| 1 | 6.733196  | -1.553757 | -0.657947 |
| 1 | 5.430994  | -2.767260 | -0.558829 |
| 1 | 6.142471  | -2.363016 | -2.136602 |
| 6 | 5.348445  | 0.289278  | -2.235581 |
| 1 | 5.627916  | -0.102593 | -3.218658 |
| 1 | 4.590788  | 1.065253  | -2.372107 |
| 1 | 6.230098  | 0.735075  | -1.761603 |
| 8 | 3.679157  | -1.469095 | -2.006584 |
| 6 | 4.392916  | -0.333045 | -0.054285 |
| 7 | 4.086185  | 0.062417  | 0.994142  |
| 1 | 2.914138  | -0.700723 | -2.314721 |

## TS2B

SCF Energy: -3696.02980738

Sum of electronic and zero-point Energies= -3694.942846

Sum of electronic and thermal Energies= -3694.873931

Sum of electronic and thermal Enthalpies= -3694.872987

Sum of electronic and thermal Free Energies= -3695.051300

Electronic energy in solution by single point calculation = -3694.40084378

|    |           |           |           |
|----|-----------|-----------|-----------|
| 6  | 0.667591  | 4.417015  | 1.135772  |
| 6  | 1.209468  | 3.158639  | 0.838847  |
| 6  | 2.290627  | 3.123495  | -0.052102 |
| 6  | 2.827675  | 4.255339  | -0.670384 |
| 6  | 2.249539  | 5.488873  | -0.357225 |
| 6  | 1.185996  | 5.568365  | 0.544246  |
| 6  | 4.033677  | 4.055757  | -1.595120 |
| 6  | 3.838407  | 2.728990  | -2.336209 |
| 6  | 3.260134  | 1.675555  | -1.626444 |
| 6  | 3.085838  | 0.386538  | -2.144786 |
| 6  | 3.537394  | 0.151883  | -3.449003 |
| 6  | 4.109037  | 1.185204  | -4.192387 |
| 6  | 4.254520  | 2.461958  | -3.644600 |
| 1  | -0.177192 | 4.488506  | 1.811380  |
| 1  | 2.627147  | 6.396617  | -0.814684 |
| 1  | 0.752359  | 6.535797  | 0.779868  |
| 1  | 3.423286  | -0.835331 | -3.883546 |
| 1  | 4.447080  | 0.994937  | -5.206803 |
| 1  | 4.702491  | 3.248140  | -4.242302 |
| 8  | 2.827127  | 1.882621  | -0.332554 |
| 15 | 2.165420  | -0.830511 | -1.117605 |
| 15 | 0.430306  | 1.568599  | 1.346997  |
| 6  | 2.128985  | -2.326262 | -2.193189 |
| 6  | 3.082954  | -3.350638 | -2.127749 |
| 6  | 1.053614  | -2.451875 | -3.085612 |
| 6  | 2.954437  | -4.486138 | -2.929074 |
| 1  | 3.917375  | -3.268034 | -1.439907 |
| 6  | 0.935443  | -3.579041 | -3.898577 |
| 1  | 0.300145  | -1.668484 | -3.112951 |
| 6  | 1.881235  | -4.604300 | -3.814409 |
| 1  | 3.694560  | -5.278996 | -2.860944 |
| 1  | 0.095232  | -3.665347 | -4.582087 |
| 1  | 1.780597  | -5.491064 | -4.434185 |
| 6  | 3.414121  | -1.316993 | 0.146842  |
| 6  | 3.045889  | -2.293514 | 1.085768  |
| 6  | 4.699448  | -0.765296 | 0.215442  |
| 6  | 3.942738  | -2.711673 | 2.065134  |
| 1  | 2.066487  | -2.753437 | 1.037542  |
| 6  | 5.595850  | -1.181221 | 1.201505  |
| 1  | 5.008574  | -0.019458 | -0.508940 |
| 6  | 5.221723  | -2.155077 | 2.127465  |
| 1  | 3.633766  | -3.472331 | 2.775199  |
| 1  | 6.590999  | -0.745581 | 1.240034  |

|    |           |           |           |
|----|-----------|-----------|-----------|
| 1  | 5.921281  | -2.477122 | 2.894047  |
| 6  | -1.046305 | 2.110048  | 2.301175  |
| 6  | -2.302686 | 1.950522  | 1.704853  |
| 6  | -0.969929 | 2.648716  | 3.596235  |
| 6  | -3.468062 | 2.315310  | 2.382336  |
| 1  | -2.362204 | 1.537593  | 0.705610  |
| 6  | -2.131662 | 3.015629  | 4.274152  |
| 1  | -0.002013 | 2.769214  | 4.073531  |
| 6  | -3.381827 | 2.846469  | 3.669387  |
| 1  | -4.422509 | 2.174371  | 1.885775  |
| 1  | -2.062977 | 3.431004  | 5.276128  |
| 1  | -4.284762 | 3.128991  | 4.204423  |
| 6  | 1.502465  | 0.902850  | 2.685306  |
| 6  | 0.939183  | -0.004360 | 3.600673  |
| 6  | 2.882200  | 1.142454  | 2.741123  |
| 6  | 1.734890  | -0.648614 | 4.546303  |
| 1  | -0.129823 | -0.194382 | 3.582258  |
| 6  | 3.674409  | 0.497898  | 3.689574  |
| 1  | 3.343246  | 1.824791  | 2.038084  |
| 6  | 3.107275  | -0.400850 | 4.593121  |
| 1  | 1.280110  | -1.343444 | 5.247546  |
| 1  | 4.742902  | 0.689133  | 3.711000  |
| 1  | 3.730716  | -0.907482 | 5.324268  |
| 46 | 0.065079  | 0.135329  | -0.519312 |
| 6  | 5.303533  | 3.925705  | -0.710884 |
| 1  | 6.185144  | 3.751496  | -1.337797 |
| 1  | 5.457860  | 4.842625  | -0.131331 |
| 1  | 5.209338  | 3.089232  | -0.011843 |
| 6  | 4.216797  | 5.232192  | -2.561869 |
| 1  | 4.386129  | 6.162192  | -2.011385 |
| 1  | 5.094657  | 5.077130  | -3.195835 |
| 1  | 3.341207  | 5.363225  | -3.205736 |
| 1  | -3.169540 | -1.253257 | 0.837117  |
| 6  | -1.694783 | 0.148275  | -1.411722 |
| 7  | -2.862582 | 0.099512  | -1.620352 |
| 13 | -4.558196 | 0.004025  | -0.886139 |
| 8  | -5.628490 | -1.121976 | -1.643813 |
| 8  | -4.101507 | -0.892194 | 0.713341  |
| 8  | -5.162965 | 1.533106  | -0.355695 |
| 6  | -6.503097 | -0.939503 | -2.739280 |
| 6  | -5.021192 | -1.647343 | 1.580316  |
| 6  | -5.356945 | 2.759432  | -1.036156 |
| 6  | -5.180739 | -3.057347 | 1.032336  |

|   |           |           |           |
|---|-----------|-----------|-----------|
| 1 | -4.214562 | -3.569246 | 0.988392  |
| 1 | -5.849613 | -3.635506 | 1.679775  |
| 1 | -5.603668 | -3.009033 | 0.025170  |
| 6 | -6.323492 | -0.870942 | 1.673203  |
| 1 | -6.141737 | 0.163308  | 1.975595  |
| 1 | -6.837002 | -0.870641 | 0.707944  |
| 1 | -6.973864 | -1.350066 | 2.412544  |
| 6 | -7.794972 | -0.255096 | -2.284268 |
| 1 | -7.577384 | 0.746859  | -1.896288 |
| 1 | -8.509318 | -0.160990 | -3.111037 |
| 1 | -8.268203 | -0.833454 | -1.483427 |
| 6 | -5.822093 | -0.169171 | -3.873595 |
| 1 | -5.591365 | 0.858199  | -3.558911 |
| 1 | -4.883731 | -0.656883 | -4.156356 |
| 1 | -6.466490 | -0.107903 | -4.758581 |
| 6 | -4.022130 | 3.467892  | -1.280355 |
| 1 | -3.531692 | 3.686879  | -0.325660 |
| 1 | -3.348288 | 2.836812  | -1.867943 |
| 1 | -4.172962 | 4.411165  | -1.819104 |
| 6 | -6.314840 | 3.619682  | -0.213212 |
| 1 | -5.869153 | 3.852054  | 0.761147  |
| 1 | -6.537855 | 4.563474  | -0.724347 |
| 1 | -7.254191 | 3.083529  | -0.041464 |
| 1 | -4.527324 | -1.660275 | 2.557223  |
| 1 | -6.758044 | -1.941887 | -3.115147 |
| 1 | -5.831884 | 2.570190  | -2.014825 |
| 6 | -0.564190 | -1.730303 | 1.118321  |
| 6 | -1.711020 | -2.189014 | 1.616313  |
| 6 | -1.016532 | -3.054276 | 0.558916  |
| 1 | 0.374841  | -1.330080 | 1.472008  |
| 1 | -2.143376 | -2.281356 | 2.608492  |
| 6 | -0.101647 | -4.172564 | 0.981672  |
| 6 | 0.530657  | -4.987716 | 0.027876  |
| 6 | 0.248717  | -4.341783 | 2.331318  |
| 6 | 1.490201  | -5.923211 | 0.410647  |
| 1 | 0.303512  | -4.869077 | -1.025019 |
| 6 | 1.195001  | -5.290567 | 2.716854  |
| 1 | -0.211520 | -3.708933 | 3.083786  |
| 6 | 1.827029  | -6.082013 | 1.755950  |
| 1 | 1.983469  | -6.520742 | -0.350792 |
| 1 | 1.444214  | -5.405343 | 3.768598  |
| 1 | 2.576066  | -6.810938 | 2.052120  |
| 6 | -1.654346 | -3.204435 | -0.811005 |

|   |           |           |           |
|---|-----------|-----------|-----------|
| 1 | -0.911109 | -3.183952 | -1.611527 |
| 1 | -2.197536 | -4.155877 | -0.871692 |
| 1 | -2.357376 | -2.396636 | -1.003275 |

## TS2

SCF Energy: -2275.41601990

|                                              |              |
|----------------------------------------------|--------------|
| Sum of electronic and zero-point Energies=   | -2274.464619 |
| Sum of electronic and thermal Energies=      | -2274.411198 |
| Sum of electronic and thermal Enthalpies=    | -2274.410254 |
| Sum of electronic and thermal Free Energies= | -2274.549302 |

Electronic energy in solution by single point calculation = -2274.24376542

|    |           |           |           |
|----|-----------|-----------|-----------|
| 46 | 0.094925  | 0.102449  | -0.631726 |
| 15 | 1.014165  | 2.143030  | 0.058489  |
| 6  | 2.685721  | 1.675372  | 0.682069  |
| 6  | 3.113066  | 0.333084  | 0.554581  |
| 6  | 3.555450  | 2.612288  | 1.266835  |
| 6  | 4.418594  | 0.004121  | 0.957942  |
| 6  | 2.263696  | -0.838867 | 0.111401  |
| 6  | 4.837666  | 2.262151  | 1.679565  |
| 1  | 3.225854  | 3.634295  | 1.401709  |
| 6  | 5.278813  | 0.950738  | 1.506273  |
| 1  | 4.744299  | -1.026538 | 0.858221  |
| 6  | 1.551544  | -1.571580 | 1.113301  |
| 6  | 2.531895  | -1.482293 | -1.137154 |
| 1  | 5.486380  | 3.008540  | 2.128426  |
| 1  | 6.279288  | 0.660518  | 1.813519  |
| 6  | 1.102062  | -2.868369 | 0.828434  |
| 6  | 2.104365  | -2.794519 | -1.341875 |
| 6  | 1.400768  | -3.514812 | -0.370258 |
| 1  | 0.547135  | -3.407539 | 1.589479  |
| 1  | 2.348231  | -3.272984 | -2.283928 |
| 6  | 1.367053  | 3.368922  | -1.369094 |
| 6  | 0.081541  | 3.034488  | 1.465907  |
| 6  | 0.459692  | 4.507169  | 1.692127  |
| 1  | -0.129377 | 4.886376  | 2.536374  |
| 1  | 1.513883  | 4.636298  | 1.953064  |
| 1  | 0.234476  | 5.140523  | 0.831910  |
| 6  | -1.424022 | 2.925640  | 1.144779  |
| 1  | -1.683039 | 3.362257  | 0.176738  |
| 1  | -1.759684 | 1.885108  | 1.170930  |
| 1  | -1.986148 | 3.471901  | 1.913339  |
| 6  | 1.933986  | 2.532482  | -2.527648 |
| 1  | 1.256963  | 1.726330  | -2.814473 |

|   |           |           |           |
|---|-----------|-----------|-----------|
| 1 | 2.090113  | 3.180737  | -3.399204 |
| 1 | 2.899132  | 2.092894  | -2.264121 |
| 6 | 0.045417  | 4.007194  | -1.833569 |
| 1 | -0.705638 | 3.254055  | -2.076635 |
| 1 | -0.377917 | 4.686900  | -1.090914 |
| 1 | 0.237571  | 4.592505  | -2.741468 |
| 6 | 1.488813  | -1.081952 | 2.551360  |
| 1 | 1.733698  | -0.019342 | 2.556187  |
| 6 | 3.358043  | -0.802335 | -2.218063 |
| 1 | 3.516778  | 0.232920  | -1.908238 |
| 6 | 0.975209  | -4.964314 | -0.559212 |
| 1 | 1.161849  | -5.464588 | 0.401440  |
| 6 | 2.567646  | -1.798655 | 3.387801  |
| 1 | 2.551110  | -1.426960 | 4.418838  |
| 1 | 2.383632  | -2.878527 | 3.412966  |
| 1 | 3.570816  | -1.632872 | 2.982761  |
| 6 | 0.107451  | -1.256133 | 3.186426  |
| 1 | 0.098155  | -0.781779 | 4.175235  |
| 1 | -0.678624 | -0.808355 | 2.570932  |
| 1 | -0.147031 | -2.310979 | 3.326511  |
| 6 | 1.780837  | -5.707148 | -1.631619 |
| 1 | 2.860357  | -5.621710 | -1.463389 |
| 1 | 1.518352  | -6.770263 | -1.626666 |
| 1 | 1.561216  | -5.323958 | -2.635541 |
| 6 | -0.536448 | -5.079337 | -0.836361 |
| 1 | -1.129346 | -4.600704 | -0.050806 |
| 1 | -0.786553 | -4.615948 | -1.798219 |
| 1 | -0.829252 | -6.134627 | -0.886704 |
| 6 | 2.631508  | -0.785193 | -3.572643 |
| 1 | 3.192054  | -0.186836 | -4.299833 |
| 1 | 2.528578  | -1.795777 | -3.983403 |
| 1 | 1.629078  | -0.359531 | -3.475076 |
| 6 | 4.744243  | -1.457058 | -2.357338 |
| 1 | 4.654152  | -2.511344 | -2.641967 |
| 1 | 5.332268  | -0.947361 | -3.129443 |
| 1 | 5.303328  | -1.408703 | -1.417923 |
| 6 | 2.391363  | 4.475514  | -1.062520 |
| 1 | 2.099731  | 5.117276  | -0.230368 |
| 1 | 3.380140  | 4.060863  | -0.852882 |
| 1 | 2.485336  | 5.113302  | -1.950708 |
| 6 | 0.329822  | 2.258950  | 2.768893  |
| 1 | 1.382745  | 2.265432  | 3.066390  |
| 1 | -0.252254 | 2.728720  | 3.571336  |

|   |           |           |           |
|---|-----------|-----------|-----------|
| 1 | -0.015363 | 1.229618  | 2.681634  |
| 6 | -1.456562 | 0.752233  | -1.937700 |
| 6 | -0.955681 | -1.511884 | -1.622050 |
| 1 | -2.037433 | 1.638177  | -1.704120 |
| 1 | -0.898397 | 0.813065  | -2.872471 |
| 1 | -1.094160 | -2.453891 | -1.103515 |
| 1 | -0.312203 | -1.547061 | -2.499186 |
| 6 | -1.997089 | -0.535591 | -1.569729 |
| 6 | -3.231157 | -0.733314 | -0.854973 |
| 6 | -4.387820 | 0.160281  | -1.178884 |
| 6 | -5.454001 | -0.303460 | -1.965899 |
| 6 | -4.467583 | 1.468449  | -0.673184 |
| 6 | -6.547510 | 0.512227  | -2.256348 |
| 1 | -5.417748 | -1.318660 | -2.354417 |
| 6 | -5.552060 | 2.292888  | -0.974544 |
| 1 | -3.690450 | 1.819338  | -0.003751 |
| 6 | -6.597786 | 1.819890  | -1.768958 |
| 1 | -7.359788 | 0.127578  | -2.868069 |
| 1 | -5.589793 | 3.301342  | -0.569488 |
| 1 | -7.447259 | 2.458103  | -1.996641 |
| 1 | -3.506292 | -1.791558 | -0.853903 |
| 6 | -3.443725 | -1.102045 | 2.412636  |
| 6 | -3.316894 | -0.780630 | 3.915042  |
| 1 | -3.864693 | -1.502348 | 4.531790  |
| 1 | -2.271233 | -0.771443 | 4.225767  |
| 1 | -3.736313 | 0.217418  | 4.078138  |
| 6 | -4.944246 | -1.129276 | 2.034368  |
| 1 | -5.341589 | -0.117840 | 2.163908  |
| 1 | -5.091512 | -1.417727 | 0.992311  |
| 1 | -5.505665 | -1.821975 | 2.671827  |
| 8 | -2.715354 | -0.189293 | 1.663048  |
| 1 | -2.934747 | -0.471851 | 0.413143  |
| 6 | -2.875022 | -2.476699 | 2.163022  |
| 7 | -2.370763 | -3.490897 | 1.898787  |

### TS3A

SCF Energy: -3065.27123525

Sum of electronic and zero-point Energies= -3064.394558

Sum of electronic and thermal Energies= -3064.338897

Sum of electronic and thermal Enthalpies= -3064.337953

Sum of electronic and thermal Free Energies= -3064.486135

Electronic energy in solution by single point calculation = -3063.84503972

|   |           |           |          |
|---|-----------|-----------|----------|
| 6 | -0.449704 | -3.684921 | 0.739502 |
|---|-----------|-----------|----------|

|    |           |           |           |
|----|-----------|-----------|-----------|
| 6  | -0.184155 | -2.311955 | 0.839783  |
| 6  | -1.226335 | -1.500712 | 1.301126  |
| 6  | -2.490563 | -1.972408 | 1.662935  |
| 6  | -2.726402 | -3.340227 | 1.507726  |
| 6  | -1.714139 | -4.187183 | 1.050667  |
| 6  | -3.462425 | -0.971528 | 2.294990  |
| 6  | -3.283756 | 0.366742  | 1.576935  |
| 6  | -1.989470 | 0.714048  | 1.191321  |
| 6  | -1.650961 | 1.936420  | 0.602207  |
| 6  | -2.669531 | 2.886739  | 0.461383  |
| 6  | -3.978977 | 2.566581  | 0.822347  |
| 6  | -4.287289 | 1.312518  | 1.355306  |
| 1  | 0.328694  | -4.356558 | 0.398186  |
| 1  | -3.698699 | -3.752396 | 1.753092  |
| 1  | -1.907909 | -5.251006 | 0.949794  |
| 1  | -2.443951 | 3.868698  | 0.064487  |
| 1  | -4.766432 | 3.302638  | 0.691047  |
| 1  | -5.314231 | 1.080491  | 1.612500  |
| 8  | -0.948366 | -0.155650 | 1.413056  |
| 15 | 0.097810  | 2.102758  | 0.075822  |
| 15 | 1.403131  | -1.498020 | 0.349536  |
| 6  | 0.225041  | 3.751018  | -0.724424 |
| 6  | 1.326620  | 4.574037  | -0.446869 |
| 6  | -0.693552 | 4.164255  | -1.705904 |
| 6  | 1.500611  | 5.778499  | -1.127917 |
| 1  | 2.053889  | 4.274082  | 0.297682  |
| 6  | -0.522010 | 5.374339  | -2.376190 |
| 1  | -1.551822 | 3.549047  | -1.947522 |
| 6  | 0.578006  | 6.184967  | -2.091822 |
| 1  | 2.362757  | 6.398619  | -0.900607 |
| 1  | -1.248252 | 5.679472  | -3.124307 |
| 1  | 0.714875  | 7.124621  | -2.619094 |
| 6  | 0.955577  | 2.317346  | 1.681383  |
| 6  | 2.351996  | 2.238028  | 1.738735  |
| 6  | 0.229858  | 2.610078  | 2.847212  |
| 6  | 3.011323  | 2.468655  | 2.946416  |
| 1  | 2.931764  | 1.991131  | 0.855228  |
| 6  | 0.895915  | 2.816542  | 4.052894  |
| 1  | -0.851392 | 2.679748  | 2.816536  |
| 6  | 2.289742  | 2.749148  | 4.104775  |
| 1  | 4.093824  | 2.402630  | 2.974360  |
| 1  | 0.324405  | 3.034138  | 4.951079  |
| 1  | 2.808054  | 2.910519  | 5.045955  |

|    |           |           |           |
|----|-----------|-----------|-----------|
| 6  | 2.310033  | -2.911310 | -0.406464 |
| 6  | 1.774026  | -3.486581 | -1.571789 |
| 6  | 3.524840  | -3.401963 | 0.087252  |
| 6  | 2.431345  | -4.530431 | -2.216789 |
| 1  | 0.844433  | -3.110228 | -1.977819 |
| 6  | 4.193532  | -4.435468 | -0.573601 |
| 1  | 3.955812  | -2.981414 | 0.987634  |
| 6  | 3.650237  | -5.003982 | -1.724844 |
| 1  | 1.998723  | -4.962663 | -3.114866 |
| 1  | 5.138438  | -4.798060 | -0.178569 |
| 1  | 4.170872  | -5.808975 | -2.235960 |
| 6  | 2.256758  | -1.235610 | 1.950839  |
| 6  | 3.573101  | -0.745004 | 1.920514  |
| 6  | 1.647782  | -1.486717 | 3.186828  |
| 6  | 4.277847  | -0.561692 | 3.108638  |
| 1  | 4.033428  | -0.478349 | 0.974557  |
| 6  | 2.347184  | -1.265179 | 4.373508  |
| 1  | 0.631800  | -1.864270 | 3.226926  |
| 6  | 3.667846  | -0.816630 | 4.337773  |
| 1  | 5.298667  | -0.192056 | 3.068963  |
| 1  | 1.861111  | -1.456736 | 5.326320  |
| 1  | 4.214524  | -0.657187 | 5.263196  |
| 46 | 0.855090  | 0.415999  | -1.256330 |
| 6  | -3.026533 | -0.769504 | 3.773948  |
| 1  | -3.675828 | -0.033091 | 4.260340  |
| 1  | -3.098363 | -1.716903 | 4.319348  |
| 1  | -1.994177 | -0.412460 | 3.837577  |
| 6  | -4.914275 | -1.458450 | 2.266863  |
| 1  | -5.011953 | -2.401834 | 2.812769  |
| 1  | -5.567685 | -0.737574 | 2.767902  |
| 1  | -5.271432 | -1.603399 | 1.245530  |
| 6  | -0.549355 | 0.981970  | -2.734647 |
| 6  | -1.887814 | 0.585840  | -2.308683 |
| 6  | -2.415650 | -0.669561 | -2.304007 |
| 1  | -0.450954 | 2.039657  | -2.970457 |
| 1  | -2.505437 | 1.382162  | -1.903928 |
| 6  | -1.595506 | -1.873924 | -2.691836 |
| 1  | -0.634195 | -1.593412 | -3.121871 |
| 1  | -1.385078 | -2.490256 | -1.807977 |
| 1  | -2.129678 | -2.509268 | -3.408959 |
| 6  | -3.810583 | -0.916512 | -1.884204 |
| 6  | -4.776726 | 0.109470  | -1.838852 |
| 6  | -4.240288 | -2.216898 | -1.551914 |

|   |           |           |           |
|---|-----------|-----------|-----------|
| 6 | -6.094622 | -0.148364 | -1.477608 |
| 1 | -4.499008 | 1.121015  | -2.112655 |
| 6 | -5.563754 | -2.478886 | -1.201951 |
| 1 | -3.529397 | -3.034276 | -1.553238 |
| 6 | -6.502735 | -1.447539 | -1.163335 |
| 1 | -6.812826 | 0.667123  | -1.459777 |
| 1 | -5.859347 | -3.494978 | -0.953899 |
| 1 | -7.535779 | -1.651274 | -0.896279 |
| 6 | 2.822610  | -0.422443 | -3.283358 |
| 6 | 4.052191  | -1.298015 | -3.320413 |
| 1 | 4.965654  | -0.701600 | -3.299899 |
| 1 | 4.041740  | -1.999977 | -2.487574 |
| 1 | 4.026575  | -1.872123 | -4.258831 |
| 6 | 2.860198  | 0.856885  | -4.090575 |
| 1 | 2.761195  | 0.576541  | -5.151129 |
| 1 | 2.034951  | 1.514307  | -3.818289 |
| 1 | 3.805235  | 1.384152  | -3.957086 |
| 8 | 1.739789  | -0.914241 | -2.896164 |
| 6 | 3.548013  | 0.798908  | -1.276108 |
| 7 | 4.387528  | 1.337745  | -0.653992 |
| 1 | -0.120650 | 0.368832  | -3.525012 |

### TS3B

SCF Energy: -3696.07788942

|                                              |              |
|----------------------------------------------|--------------|
| Sum of electronic and zero-point Energies=   | -3694.987168 |
| Sum of electronic and thermal Energies=      | -3694.919442 |
| Sum of electronic and thermal Enthalpies=    | -3694.918498 |
| Sum of electronic and thermal Free Energies= | -3695.093295 |

Electronic energy in solution by single point calculation = -3694.44736336

|   |           |           |           |
|---|-----------|-----------|-----------|
| 6 | 0.426410  | 0.903728  | -3.879141 |
| 6 | 1.002820  | 0.696361  | -2.616662 |
| 6 | 2.004681  | -0.273143 | -2.522916 |
| 6 | 2.401316  | -1.086779 | -3.589450 |
| 6 | 1.777952  | -0.872137 | -4.820215 |
| 6 | 0.814358  | 0.127632  | -4.968282 |
| 6 | 3.522381  | -2.101700 | -3.340280 |
| 6 | 3.366488  | -2.620101 | -1.908519 |
| 6 | 2.945820  | -1.712208 | -0.938652 |
| 6 | 2.808855  | -2.025243 | 0.414898  |
| 6 | 3.125962  | -3.326637 | 0.818608  |
| 6 | 3.540019  | -4.265652 | -0.126932 |
| 6 | 3.655943  | -3.918169 | -1.474966 |
| 1 | -0.349927 | 1.649607  | -3.998176 |

|    |           |           |           |
|----|-----------|-----------|-----------|
| 1  | 2.045138  | -1.481788 | -5.676002 |
| 1  | 0.349089  | 0.288415  | -5.935796 |
| 1  | 3.027420  | -3.606128 | 1.861478  |
| 1  | 3.772468  | -5.278256 | 0.187962  |
| 1  | 3.975832  | -4.668680 | -2.189158 |
| 8  | 2.610524  | -0.421888 | -1.294598 |
| 15 | 2.119738  | -0.720478 | 1.497541  |
| 15 | 0.386216  | 1.547123  | -1.099142 |
| 6  | 2.185129  | -1.499611 | 3.153929  |
| 6  | 3.215222  | -1.238340 | 4.066935  |
| 6  | 1.163625  | -2.399215 | 3.501459  |
| 6  | 3.220666  | -1.865034 | 5.314285  |
| 1  | 4.009252  | -0.546791 | 3.805615  |
| 6  | 1.181882  | -3.031533 | 4.743597  |
| 1  | 0.351770  | -2.598537 | 2.810096  |
| 6  | 2.207481  | -2.762722 | 5.653543  |
| 1  | 4.019378  | -1.651815 | 6.019265  |
| 1  | 0.387482  | -3.725852 | 5.001055  |
| 1  | 2.214440  | -3.249256 | 6.624817  |
| 6  | 3.438558  | 0.549359  | 1.535222  |
| 6  | 3.085546  | 1.850436  | 1.917465  |
| 6  | 4.767787  | 0.271310  | 1.192545  |
| 6  | 4.046988  | 2.857137  | 1.967366  |
| 1  | 2.051456  | 2.072680  | 2.159408  |
| 6  | 5.727516  | 1.283369  | 1.231650  |
| 1  | 5.049389  | -0.733278 | 0.892684  |
| 6  | 5.369094  | 2.575762  | 1.619673  |
| 1  | 3.756609  | 3.864010  | 2.247500  |
| 1  | 6.755645  | 1.061353  | 0.959342  |
| 1  | 6.116976  | 3.363262  | 1.644328  |
| 6  | -1.215478 | 2.177673  | -1.730473 |
| 6  | -2.252519 | 1.235385  | -1.854008 |
| 6  | -1.419132 | 3.490220  | -2.172366 |
| 6  | -3.466068 | 1.606105  | -2.431112 |
| 1  | -2.122918 | 0.206057  | -1.523623 |
| 6  | -2.641794 | 3.856700  | -2.736015 |
| 1  | -0.625610 | 4.224193  | -2.085918 |
| 6  | -3.663051 | 2.915944  | -2.873019 |
| 1  | -4.252696 | 0.865271  | -2.528804 |
| 1  | -2.793135 | 4.879635  | -3.068091 |
| 1  | -4.611609 | 3.203756  | -3.317967 |
| 6  | 1.471864  | 3.008370  | -0.919464 |
| 6  | 1.054364  | 4.050640  | -0.076642 |

|    |           |           |           |
|----|-----------|-----------|-----------|
| 6  | 2.741005  | 3.068747  | -1.505890 |
| 6  | 1.883375  | 5.146570  | 0.151354  |
| 1  | 0.070511  | 4.016585  | 0.378977  |
| 6  | 3.575982  | 4.159335  | -1.259848 |
| 1  | 3.079553  | 2.265230  | -2.150865 |
| 6  | 3.149105  | 5.202820  | -0.438171 |
| 1  | 1.538626  | 5.956026  | 0.789296  |
| 1  | 4.561802  | 4.192601  | -1.714636 |
| 1  | 3.799107  | 6.053829  | -0.255371 |
| 46 | 0.041860  | 0.233756  | 0.917038  |
| 6  | 4.880058  | -1.354409 | -3.435108 |
| 1  | 5.706617  | -2.043936 | -3.230905 |
| 1  | 5.011614  | -0.933900 | -4.438174 |
| 1  | 4.928292  | -0.536616 | -2.709633 |
| 6  | 3.501541  | -3.241341 | -4.366669 |
| 1  | 3.648045  | -2.854171 | -5.379003 |
| 1  | 4.318067  | -3.944241 | -4.178079 |
| 1  | 2.554977  | -3.790334 | -4.336848 |
| 1  | -2.633779 | 0.545491  | 3.584822  |
| 6  | -1.308852 | -0.827139 | 1.776233  |
| 7  | -1.902344 | -1.850590 | 1.855327  |
| 13 | -3.240270 | -2.543119 | 0.628391  |
| 8  | -3.232771 | -4.241723 | 0.964346  |
| 8  | -4.709016 | -1.654905 | 0.948397  |
| 8  | -2.587373 | -2.057066 | -0.944687 |
| 6  | -3.959582 | -5.320111 | 0.434372  |
| 6  | -5.277726 | -0.600839 | 0.216350  |
| 6  | -1.690518 | -2.830438 | -1.714499 |
| 6  | -6.397609 | 0.027381  | 1.048393  |
| 1  | -6.014303 | 0.349372  | 2.022573  |
| 1  | -6.839444 | 0.893664  | 0.539751  |
| 1  | -7.186338 | -0.712056 | 1.229111  |
| 6  | -5.793087 | -1.078974 | -1.145635 |
| 1  | -4.966934 | -1.502450 | -1.724327 |
| 1  | -6.555084 | -1.854762 | -1.005982 |
| 1  | -6.244440 | -0.254542 | -1.713952 |
| 6  | -4.929148 | -4.887867 | -0.671846 |
| 1  | -4.378273 | -4.441083 | -1.509337 |
| 1  | -5.502615 | -5.740924 | -1.055391 |
| 1  | -5.632436 | -4.140395 | -0.290639 |
| 6  | -2.982791 | -6.389166 | -0.064683 |
| 1  | -2.389018 | -5.997867 | -0.899912 |
| 1  | -2.293268 | -6.669376 | 0.738515  |

|   |           |           |           |
|---|-----------|-----------|-----------|
| 1 | -3.510713 | -7.289087 | -0.404690 |
| 6 | -0.298575 | -2.852595 | -1.078716 |
| 1 | 0.060949  | -1.825369 | -0.946811 |
| 1 | -0.331511 | -3.321011 | -0.090114 |
| 1 | 0.423522  | -3.399002 | -1.697186 |
| 6 | -1.643207 | -2.273797 | -3.138323 |
| 1 | -1.237763 | -1.256998 | -3.143151 |
| 1 | -1.008671 | -2.892402 | -3.784948 |
| 1 | -2.651484 | -2.241618 | -3.565142 |
| 1 | -4.521067 | 0.182085  | 0.022426  |
| 1 | -4.558351 | -5.765241 | 1.247474  |
| 1 | -2.051067 | -3.871263 | -1.771259 |
| 6 | -2.017141 | 0.873211  | 1.458049  |
| 6 | -2.875987 | 1.089621  | 2.676564  |
| 6 | -1.938252 | 2.191025  | 2.262840  |
| 1 | -2.550436 | 0.910565  | 0.518084  |
| 1 | -3.940953 | 1.198139  | 2.497455  |
| 6 | -2.507116 | 3.409575  | 1.594484  |
| 6 | -1.909975 | 4.669280  | 1.756761  |
| 6 | -3.659277 | 3.332758  | 0.793305  |
| 6 | -2.430531 | 5.804217  | 1.130625  |
| 1 | -1.033180 | 4.776728  | 2.385756  |
| 6 | -4.183143 | 4.463596  | 0.176298  |
| 1 | -4.153734 | 2.380395  | 0.636290  |
| 6 | -3.569863 | 5.708159  | 0.335722  |
| 1 | -1.943555 | 6.765026  | 1.275376  |
| 1 | -5.071093 | 4.367534  | -0.441023 |
| 1 | -3.978512 | 6.589244  | -0.150678 |
| 6 | -0.741154 | 2.412501  | 3.172578  |
| 1 | 0.099666  | 2.858720  | 2.631270  |
| 1 | -1.005955 | 3.080921  | 4.001200  |
| 1 | -0.398973 | 1.465304  | 3.596285  |

### TS3

SCF Energy: -2275.41788656

|                                              |              |
|----------------------------------------------|--------------|
| Sum of electronic and zero-point Energies=   | -2274.466383 |
| Sum of electronic and thermal Energies=      | -2274.411395 |
| Sum of electronic and thermal Enthalpies=    | -2274.410451 |
| Sum of electronic and thermal Free Energies= | -2274.553912 |

Electronic energy in solution by single point calculation = -2274.23752015

|    |           |           |           |
|----|-----------|-----------|-----------|
| 46 | 0.553878  | -0.767656 | 0.004418  |
| 15 | -1.614061 | -1.644698 | -0.476317 |
| 6  | -3.114076 | -0.564361 | -0.188166 |

|   |           |           |           |
|---|-----------|-----------|-----------|
| 6 | -3.118696 | 0.765956  | 0.302274  |
| 6 | -4.364591 | -1.162799 | -0.445831 |
| 6 | -4.356531 | 1.367401  | 0.603675  |
| 6 | -1.951425 | 1.701357  | 0.448890  |
| 6 | -5.576929 | -0.537040 | -0.177226 |
| 1 | -4.396216 | -2.152817 | -0.870046 |
| 6 | -5.574525 | 0.736714  | 0.383570  |
| 1 | -4.341277 | 2.377579  | 0.999363  |
| 6 | -1.253803 | 1.818510  | 1.668874  |
| 6 | -1.706581 | 2.627717  | -0.594154 |
| 1 | -6.509219 | -1.048602 | -0.397939 |
| 1 | -6.504331 | 1.242922  | 0.626042  |
| 6 | -0.282150 | 2.817074  | 1.799864  |
| 6 | -0.723920 | 3.605719  | -0.414353 |
| 6 | 0.010674  | 3.710420  | 0.768636  |
| 1 | 0.264340  | 2.904920  | 2.734301  |
| 1 | -0.529853 | 4.307929  | -1.219124 |
| 6 | -1.737424 | -2.160731 | -2.327349 |
| 6 | -1.951693 | -3.155786 | 0.667257  |
| 6 | -3.300872 | -3.892015 | 0.549086  |
| 1 | -3.242217 | -4.776626 | 1.195972  |
| 1 | -4.134163 | -3.286415 | 0.911251  |
| 1 | -3.529281 | -4.245129 | -0.456043 |
| 6 | -0.821850 | -4.168201 | 0.405215  |
| 1 | -0.976083 | -4.699291 | -0.539590 |
| 1 | 0.170297  | -3.712982 | 0.366233  |
| 1 | -0.828949 | -4.920009 | 1.205045  |
| 6 | -2.118308 | -0.894271 | -3.115100 |
| 1 | -1.488426 | -0.042502 | -2.856842 |
| 1 | -1.994112 | -1.089032 | -4.187478 |
| 1 | -3.158813 | -0.605865 | -2.940414 |
| 6 | -0.352767 | -2.662861 | -2.774944 |
| 1 | 0.443158  | -1.942250 | -2.608277 |
| 1 | -0.046748 | -3.566964 | -2.247964 |
| 1 | -0.393545 | -2.893627 | -3.847451 |
| 6 | -1.610338 | 0.948292  | 2.864183  |
| 1 | -2.045781 | 0.025726  | 2.476123  |
| 6 | -2.527243 | 2.634798  | -1.882566 |
| 1 | -3.030896 | 1.668534  | -1.968579 |
| 6 | 1.077904  | 4.777907  | 0.939248  |
| 1 | 1.540838  | 4.620575  | 1.922630  |
| 6 | -2.681796 | 1.641834  | 3.727919  |
| 1 | -2.945538 | 1.012948  | 4.586451  |

|   |           |           |           |
|---|-----------|-----------|-----------|
| 1 | -2.306410 | 2.598681  | 4.109869  |
| 1 | -3.594813 | 1.838351  | 3.159175  |
| 6 | -0.404894 | 0.563057  | 3.732362  |
| 1 | -0.710972 | -0.180917 | 4.476670  |
| 1 | 0.397824  | 0.128804  | 3.133616  |
| 1 | -0.009948 | 1.425650  | 4.281933  |
| 6 | 0.458416  | 6.186322  | 0.933749  |
| 1 | -0.309441 | 6.282138  | 1.708859  |
| 1 | 1.225611  | 6.948746  | 1.111618  |
| 1 | -0.012300 | 6.403427  | -0.032302 |
| 6 | 2.184860  | 4.658838  | -0.122694 |
| 1 | 2.651320  | 3.668749  | -0.102881 |
| 1 | 1.783495  | 4.818204  | -1.130364 |
| 1 | 2.963765  | 5.410816  | 0.048277  |
| 6 | -1.685189 | 2.832506  | -3.154779 |
| 1 | -2.319513 | 2.711895  | -4.039888 |
| 1 | -1.249981 | 3.836869  | -3.201893 |
| 1 | -0.866581 | 2.111758  | -3.226152 |
| 6 | -3.615139 | 3.724301  | -1.816770 |
| 1 | -3.159750 | 4.715202  | -1.704437 |
| 1 | -4.212626 | 3.726653  | -2.735995 |
| 1 | -4.291604 | 3.566513  | -0.972920 |
| 6 | -2.743263 | -3.270049 | -2.682762 |
| 1 | -2.480025 | -4.224149 | -2.221574 |
| 1 | -3.777678 | -3.025490 | -2.433431 |
| 1 | -2.705623 | -3.417884 | -3.769401 |
| 6 | -1.882921 | -2.630129 | 2.113220  |
| 1 | -2.713152 | -1.946320 | 2.318004  |
| 1 | -1.986050 | -3.482805 | 2.797820  |
| 1 | -0.938562 | -2.137246 | 2.334336  |
| 6 | 0.766373  | 0.522356  | -1.613538 |
| 6 | 2.267722  | 0.919939  | 0.202313  |
| 1 | 0.623242  | 0.120123  | -2.612772 |
| 1 | 0.111663  | 1.348904  | -1.362746 |
| 1 | 3.225456  | 0.816069  | 0.699024  |
| 1 | 1.491425  | 1.465971  | 0.728848  |
| 6 | 2.127863  | 0.582679  | -1.128252 |
| 6 | 3.264154  | 0.073868  | -1.991399 |
| 6 | 4.627362  | 0.191293  | -1.351545 |
| 6 | 5.263261  | -0.939518 | -0.825159 |
| 6 | 5.256522  | 1.438635  | -1.237180 |
| 6 | 6.501984  | -0.819050 | -0.190915 |
| 1 | 4.770478  | -1.902789 | -0.916214 |

|   |          |           |           |
|---|----------|-----------|-----------|
| 6 | 6.492291 | 1.559551  | -0.602310 |
| 1 | 4.770153 | 2.321518  | -1.647593 |
| 6 | 7.118252 | 0.427696  | -0.073880 |
| 1 | 6.987363 | -1.705083 | 0.210193  |
| 1 | 6.967957 | 2.533576  | -0.522794 |
| 1 | 8.082214 | 0.518359  | 0.419669  |
| 1 | 3.056333 | -0.973812 | -2.245307 |
| 6 | 2.094160 | -2.478917 | 2.251630  |
| 6 | 3.508104 | -1.995028 | 2.097267  |
| 1 | 4.155163 | -2.795968 | 1.734500  |
| 1 | 3.566523 | -1.152356 | 1.414867  |
| 1 | 3.866181 | -1.688084 | 3.092322  |
| 6 | 1.911342 | -3.873583 | 2.788409  |
| 1 | 2.620055 | -4.086810 | 3.596692  |
| 1 | 0.885240 | -4.031308 | 3.123736  |
| 1 | 2.130654 | -4.554007 | 1.956993  |
| 8 | 1.111956 | -1.756936 | 2.057330  |
| 1 | 3.232359 | 0.653746  | -2.924713 |
| 6 | 2.291116 | -3.047050 | -0.506117 |
| 7 | 2.714523 | -3.043814 | -1.605473 |

#### TS4A

SCF Energy: -2872.10231274

|                                              |              |
|----------------------------------------------|--------------|
| Sum of electronic and zero-point Energies=   | -2871.312895 |
| Sum of electronic and thermal Energies=      | -2871.263622 |
| Sum of electronic and thermal Enthalpies=    | -2871.262678 |
| Sum of electronic and thermal Free Energies= | -2871.397076 |

Electronic energy in solution by single point calculation = -2870.77156872

|   |           |          |          |
|---|-----------|----------|----------|
| 6 | -3.330583 | 1.079090 | 0.806862 |
| 6 | -2.080032 | 0.443353 | 0.860006 |
| 6 | -1.054814 | 1.127329 | 1.522083 |
| 6 | -1.221352 | 2.356701 | 2.165461 |
| 6 | -2.476716 | 2.960266 | 2.078245 |
| 6 | -3.518103 | 2.328114 | 1.396788 |
| 6 | -0.028607 | 2.897147 | 2.962541 |
| 6 | 1.225152  | 2.614485 | 2.133187 |
| 6 | 1.266949  | 1.400226 | 1.448202 |
| 6 | 2.335388  | 0.995461 | 0.641790 |
| 6 | 3.440120  | 1.852509 | 0.557824 |
| 6 | 3.437164  | 3.070233 | 1.241337 |
| 6 | 2.339074  | 3.450190 | 2.017466 |
| 1 | -4.153484 | 0.597834 | 0.292445 |
| 1 | -2.646578 | 3.927780 | 2.536112 |

|    |           |           |           |
|----|-----------|-----------|-----------|
| 1  | -4.488053 | 2.811735  | 1.330013  |
| 1  | 4.291737  | 1.571970  | -0.052121 |
| 1  | 4.297444  | 3.729103  | 1.168658  |
| 1  | 2.353388  | 4.406094  | 2.529544  |
| 8  | 0.195528  | 0.535677  | 1.525823  |
| 15 | 2.105369  | -0.559678 | -0.312573 |
| 15 | -1.703128 | -1.132964 | -0.026198 |
| 6  | 3.683412  | -0.665850 | -1.252166 |
| 6  | 4.702734  | -1.571235 | -0.929609 |
| 6  | 3.849704  | 0.170241  | -2.369096 |
| 6  | 5.860497  | -1.637654 | -1.707319 |
| 1  | 4.591624  | -2.224970 | -0.071547 |
| 6  | 5.011348  | 0.112993  | -3.136039 |
| 1  | 3.068825  | 0.876421  | -2.632792 |
| 6  | 6.019899  | -0.796790 | -2.808803 |
| 1  | 6.640510  | -2.347979 | -1.447500 |
| 1  | 5.125531  | 0.771147  | -3.992826 |
| 1  | 6.921801  | -0.850949 | -3.411671 |
| 6  | 2.301696  | -1.853372 | 0.968428  |
| 6  | 1.810524  | -3.134509 | 0.684230  |
| 6  | 2.940060  | -1.615840 | 2.192331  |
| 6  | 1.975423  | -4.168481 | 1.603554  |
| 1  | 1.287632  | -3.308560 | -0.252116 |
| 6  | 3.086215  | -2.648259 | 3.118894  |
| 1  | 3.322250  | -0.625316 | 2.418886  |
| 6  | 2.608617  | -3.926139 | 2.823411  |
| 1  | 1.583427  | -5.154709 | 1.378604  |
| 1  | 3.575868  | -2.454880 | 4.069533  |
| 1  | 2.720961  | -4.729499 | 3.546119  |
| 6  | -3.376061 | -1.643116 | -0.597584 |
| 6  | -3.676417 | -1.658668 | -1.963118 |
| 6  | -4.369667 | -2.005944 | 0.328763  |
| 6  | -4.954992 | -2.018396 | -2.398248 |
| 1  | -2.904558 | -1.427741 | -2.684441 |
| 6  | -5.643948 | -2.358284 | -0.106933 |
| 1  | -4.139924 | -2.010162 | 1.390017  |
| 6  | -5.939569 | -2.362844 | -1.474289 |
| 1  | -5.170829 | -2.039005 | -3.462594 |
| 1  | -6.405766 | -2.634008 | 0.617149  |
| 1  | -6.932592 | -2.644343 | -1.813945 |
| 6  | -1.439927 | -2.382492 | 1.299406  |
| 6  | -1.560052 | -3.731227 | 0.924122  |
| 6  | -1.111430 | -2.072816 | 2.622938  |

|    |           |           |           |
|----|-----------|-----------|-----------|
| 6  | -1.376036 | -4.744737 | 1.860339  |
| 1  | -1.813801 | -3.983344 | -0.101989 |
| 6  | -0.910383 | -3.092362 | 3.555321  |
| 1  | -1.018969 | -1.040416 | 2.935415  |
| 6  | -1.047659 | -4.427960 | 3.180861  |
| 1  | -1.485458 | -5.782683 | 1.557854  |
| 1  | -0.650424 | -2.837110 | 4.578841  |
| 1  | -0.896450 | -5.218175 | 3.910893  |
| 46 | 0.053413  | -0.746220 | -1.536326 |
| 6  | 0.074993  | 2.086905  | 4.283994  |
| 1  | 0.931760  | 2.434020  | 4.872213  |
| 1  | -0.835839 | 2.217197  | 4.878503  |
| 1  | 0.207866  | 1.019700  | 4.084668  |
| 6  | -0.182929 | 4.382247  | 3.306455  |
| 1  | -1.067036 | 4.538054  | 3.932140  |
| 1  | 0.678437  | 4.734991  | 3.881839  |
| 1  | -0.281926 | 4.992686  | 2.405787  |
| 6  | 0.341587  | 0.159361  | -3.713363 |
| 6  | 0.229748  | 1.368971  | -2.871944 |
| 6  | -0.921826 | 2.024539  | -2.543085 |
| 1  | 1.359556  | -0.118846 | -3.972619 |
| 1  | 1.169547  | 1.750785  | -2.487540 |
| 6  | -2.260635 | 1.554275  | -3.059637 |
| 1  | -2.176662 | 0.623533  | -3.619554 |
| 1  | -2.960773 | 1.377108  | -2.235060 |
| 1  | -2.717520 | 2.303744  | -3.719416 |
| 6  | -0.909150 | 3.234138  | -1.693335 |
| 6  | 0.258658  | 3.712536  | -1.062258 |
| 6  | -2.089710 | 3.979407  | -1.502774 |
| 6  | 0.254113  | 4.897188  | -0.336159 |
| 1  | 1.186109  | 3.155287  | -1.125819 |
| 6  | -2.098410 | 5.156900  | -0.758211 |
| 1  | -3.017508 | 3.641159  | -1.947376 |
| 6  | -0.923261 | 5.634356  | -0.181490 |
| 1  | 1.176805  | 5.236643  | 0.123509  |
| 1  | -3.028754 | 5.705443  | -0.637748 |
| 1  | -0.922489 | 6.561991  | 0.384304  |
| 6  | -0.539514 | -1.495282 | -3.301108 |
| 7  | -0.944568 | -2.361470 | -3.988590 |
| 1  | -0.286312 | 0.187425  | -4.597880 |

**TS4B**

SCF Energy: -3502.13862834

Sum of electronic and zero-point Energies= -3501.131742  
 Sum of electronic and thermal Energies= -3501.067166  
 Sum of electronic and thermal Enthalpies= -3501.066222  
 Sum of electronic and thermal Free Energies= -3501.235830  
 Electronic energy in solution by single point calculation = -3500.67135723

|    |           |           |           |
|----|-----------|-----------|-----------|
| 6  | -3.400809 | 1.060665  | 2.930995  |
| 6  | -2.835485 | 0.425141  | 1.815665  |
| 6  | -2.454277 | -0.914393 | 1.958594  |
| 6  | -2.527458 | -1.610674 | 3.169873  |
| 6  | -3.064503 | -0.930811 | 4.265446  |
| 6  | -3.517310 | 0.384995  | 4.143026  |
| 6  | -2.062570 | -3.069808 | 3.187917  |
| 6  | -0.892752 | -3.201600 | 2.208223  |
| 6  | -0.938427 | -2.445993 | 1.037056  |
| 6  | 0.008014  | -2.539842 | 0.011140  |
| 6  | 1.056298  | -3.451347 | 0.181677  |
| 6  | 1.148498  | -4.203745 | 1.352450  |
| 6  | 0.185959  | -4.080369 | 2.355625  |
| 1  | -3.718723 | 2.094291  | 2.855513  |
| 1  | -3.138148 | -1.427998 | 5.226034  |
| 1  | -3.947316 | 0.889203  | 5.002997  |
| 1  | 1.810217  | -3.553734 | -0.588630 |
| 1  | 1.979910  | -4.888854 | 1.483577  |
| 1  | 0.278714  | -4.678695 | 3.254839  |
| 8  | -1.965044 | -1.542031 | 0.839363  |
| 15 | -0.177111 | -1.399944 | -1.415266 |
| 15 | -2.410327 | 1.317213  | 0.266720  |
| 6  | 1.162545  | -1.903921 | -2.551967 |
| 6  | 0.901710  | -2.422341 | -3.828665 |
| 6  | 2.493164  | -1.693238 | -2.152812 |
| 6  | 1.957990  | -2.723219 | -4.690085 |
| 1  | -0.120788 | -2.591464 | -4.149383 |
| 6  | 3.542959  | -1.999783 | -3.015696 |
| 1  | 2.737312  | -1.291261 | -1.178781 |
| 6  | 3.278557  | -2.512873 | -4.287509 |
| 1  | 1.745954  | -3.125598 | -5.677055 |
| 1  | 4.557357  | -1.816911 | -2.675788 |
| 1  | 4.096531  | -2.747047 | -4.963383 |
| 6  | -1.710129 | -1.995425 | -2.222132 |
| 6  | -2.420118 | -1.103643 | -3.035985 |
| 6  | -2.193360 | -3.299146 | -2.047977 |
| 6  | -3.593398 | -1.508325 | -3.670910 |
| 1  | -2.057661 | -0.086997 | -3.154420 |

|    |           |           |           |
|----|-----------|-----------|-----------|
| 6  | -3.373968 | -3.698870 | -2.673292 |
| 1  | -1.647608 | -3.997506 | -1.421284 |
| 6  | -4.075362 | -2.804631 | -3.485216 |
| 1  | -4.140736 | -0.803866 | -4.287915 |
| 1  | -3.745081 | -4.709754 | -2.528274 |
| 1  | -4.996696 | -3.116958 | -3.968896 |
| 6  | -2.493312 | 3.065517  | 0.846407  |
| 6  | -1.467712 | 3.491246  | 1.713094  |
| 6  | -3.458839 | 3.992003  | 0.433103  |
| 6  | -1.413034 | 4.812897  | 2.152794  |
| 1  | -0.717333 | 2.777927  | 2.043692  |
| 6  | -3.393095 | 5.319155  | 0.865722  |
| 1  | -4.259392 | 3.680358  | -0.228505 |
| 6  | -2.372987 | 5.733619  | 1.722373  |
| 1  | -0.616001 | 5.124215  | 2.821714  |
| 1  | -4.144720 | 6.028689  | 0.531636  |
| 1  | -2.323948 | 6.766623  | 2.053452  |
| 6  | -3.867407 | 1.145618  | -0.823805 |
| 6  | -3.845770 | 1.826034  | -2.053139 |
| 6  | -4.955399 | 0.324683  | -0.512044 |
| 6  | -4.916392 | 1.713820  | -2.936723 |
| 1  | -2.987085 | 2.441732  | -2.311697 |
| 6  | -6.013341 | 0.191252  | -1.413342 |
| 1  | -4.974698 | -0.210210 | 0.432051  |
| 6  | -6.001845 | 0.891686  | -2.619311 |
| 1  | -4.897848 | 2.255218  | -3.878483 |
| 1  | -6.850197 | -0.456127 | -1.167504 |
| 1  | -6.830899 | 0.793211  | -3.314253 |
| 46 | -0.287321 | 0.855341  | -0.749650 |
| 6  | -3.226185 | -3.952948 | 2.661466  |
| 1  | -2.918042 | -5.003759 | 2.630852  |
| 1  | -4.099479 | -3.860702 | 3.316817  |
| 1  | -3.519479 | -3.652068 | 1.651065  |
| 6  | -1.679062 | -3.529041 | 4.600750  |
| 1  | -2.535157 | -3.459616 | 5.277980  |
| 1  | -1.370354 | -4.578052 | 4.593567  |
| 1  | -0.860204 | -2.928168 | 5.009166  |
| 6  | 1.005682  | 3.358819  | -1.197386 |
| 6  | 1.733705  | 3.414139  | -2.517141 |
| 1  | 2.755920  | 3.049016  | -2.420095 |
| 1  | 1.207859  | 2.826169  | -3.273618 |
| 1  | 1.753054  | 4.463308  | -2.846741 |
| 6  | 1.710451  | 3.946810  | 0.003571  |

|    |           |           |           |
|----|-----------|-----------|-----------|
| 1  | 1.791851  | 5.032711  | -0.156284 |
| 1  | 1.144543  | 3.781383  | 0.923264  |
| 1  | 2.708449  | 3.528606  | 0.135055  |
| 8  | -0.274100 | 3.822261  | -1.387685 |
| 1  | -0.722634 | 3.895553  | -0.525040 |
| 6  | 1.597475  | 1.320757  | -0.829577 |
| 7  | 2.704561  | 1.072042  | -0.510013 |
| 13 | 4.126537  | 0.654554  | 0.696092  |
| 8  | 4.791610  | -0.764984 | -0.089176 |
| 8  | 5.099242  | 2.104413  | 0.729546  |
| 8  | 3.338554  | 0.405221  | 2.235207  |
| 6  | 5.616485  | -1.784911 | 0.422260  |
| 6  | 5.705873  | 2.655416  | -0.416122 |
| 6  | 2.228469  | -0.429630 | 2.458635  |
| 6  | 6.985002  | 1.894316  | -0.780437 |
| 1  | 6.751131  | 0.842088  | -0.968699 |
| 1  | 7.463507  | 2.315741  | -1.673844 |
| 1  | 7.696148  | 1.946272  | 0.052975  |
| 6  | 5.983128  | 4.137634  | -0.159230 |
| 1  | 5.052902  | 4.661929  | 0.086770  |
| 1  | 6.664474  | 4.244646  | 0.692766  |
| 1  | 6.436545  | 4.619774  | -1.034231 |
| 6  | 6.347687  | -1.355548 | 1.698965  |
| 1  | 5.626321  | -1.132675 | 2.493857  |
| 1  | 7.025440  | -2.141754 | 2.054267  |
| 1  | 6.936074  | -0.450538 | 1.512556  |
| 6  | 4.787389  | -3.054259 | 0.647203  |
| 1  | 4.004283  | -2.863227 | 1.389443  |
| 1  | 4.302732  | -3.356636 | -0.287506 |
| 1  | 5.410425  | -3.885590 | 1.000631  |
| 6  | 0.975973  | 0.419877  | 2.704597  |
| 1  | 1.157052  | 1.111126  | 3.536964  |
| 1  | 0.738780  | 1.005683  | 1.809122  |
| 1  | 0.105479  | -0.201877 | 2.943659  |
| 6  | 2.508860  | -1.348373 | 3.650550  |
| 1  | 2.711022  | -0.745529 | 4.543688  |
| 1  | 1.657974  | -2.010573 | 3.851315  |
| 1  | 3.390118  | -1.967914 | 3.454903  |
| 1  | 5.016783  | 2.586982  | -1.281596 |
| 1  | 6.379354  | -2.013655 | -0.341699 |
| 1  | 2.029950  | -1.068759 | 1.580338  |

TS4

S121

SCF Energy: -2082.25013524

|                                              |              |
|----------------------------------------------|--------------|
| Sum of electronic and zero-point Energies=   | -2081.395094 |
| Sum of electronic and thermal Energies=      | -2081.347034 |
| Sum of electronic and thermal Enthalpies=    | -2081.346089 |
| Sum of electronic and thermal Free Energies= | -2081.475198 |

Electronic energy in solution by single point calculation = -2081.16405434

|    |           |           |           |
|----|-----------|-----------|-----------|
| 46 | -0.076314 | -0.640645 | -0.276040 |
| 15 | -2.284647 | -1.306724 | -0.087643 |
| 6  | -3.264126 | 0.196621  | 0.362919  |
| 6  | -2.608719 | 1.444172  | 0.518550  |
| 6  | -4.662133 | 0.148800  | 0.507829  |
| 6  | -3.384456 | 2.576198  | 0.825479  |
| 6  | -1.128475 | 1.717769  | 0.363424  |
| 6  | -5.412378 | 1.281878  | 0.809159  |
| 1  | -5.176307 | -0.794663 | 0.378445  |
| 6  | -4.766599 | 2.506215  | 0.972714  |
| 1  | -2.878751 | 3.530244  | 0.939463  |
| 6  | -0.307626 | 1.847699  | 1.521743  |
| 6  | -0.628556 | 2.191224  | -0.879286 |
| 1  | -6.491056 | 1.207436  | 0.912453  |
| 1  | -5.333307 | 3.402798  | 1.206734  |
| 6  | 0.967211  | 2.399016  | 1.398129  |
| 6  | 0.661508  | 2.737111  | -0.945618 |
| 6  | 1.482334  | 2.849417  | 0.176127  |
| 1  | 1.583898  | 2.496666  | 2.287164  |
| 1  | 1.015840  | 3.100639  | -1.902669 |
| 6  | -3.067654 | -2.006166 | -1.687796 |
| 6  | -2.519566 | -2.555775 | 1.337805  |
| 6  | -3.958600 | -2.724837 | 1.850935  |
| 1  | -3.956810 | -3.479539 | 2.647811  |
| 1  | -4.343404 | -1.796053 | 2.281380  |
| 1  | -4.654671 | -3.065522 | 1.082494  |
| 6  | -1.940407 | -3.914092 | 0.897742  |
| 1  | -2.558667 | -4.409432 | 0.145149  |
| 1  | -0.921301 | -3.817804 | 0.512409  |
| 1  | -1.905292 | -4.574812 | 1.773384  |
| 6  | -3.383244 | -0.826944 | -2.621424 |
| 1  | -2.485495 | -0.249454 | -2.841346 |
| 1  | -3.764053 | -1.219630 | -3.572583 |
| 1  | -4.139748 | -0.155180 | -2.205700 |
| 6  | -1.984080 | -2.869221 | -2.368542 |
| 1  | -1.077512 | -2.286795 | -2.554673 |
| 1  | -1.694232 | -3.734344 | -1.769903 |

|   |           |           |           |
|---|-----------|-----------|-----------|
| 1 | -2.370701 | -3.234498 | -3.328976 |
| 6 | -0.814660 | 1.470409  | 2.904951  |
| 1 | -1.722150 | 0.876452  | 2.772749  |
| 6 | -1.499298 | 2.226622  | -2.125848 |
| 1 | -2.389844 | 1.629334  | -1.923521 |
| 6 | 2.883191  | 3.446657  | 0.132289  |
| 1 | 2.938687  | 4.167803  | 0.961162  |
| 6 | -1.203812 | 2.726243  | 3.706179  |
| 1 | -1.574662 | 2.447665  | 4.699501  |
| 1 | -0.338686 | 3.386048  | 3.839393  |
| 1 | -1.988187 | 3.295489  | 3.197915  |
| 6 | 0.200071  | 0.621765  | 3.687883  |
| 1 | -0.260266 | 0.225754  | 4.599957  |
| 1 | 0.558639  | -0.219363 | 3.088576  |
| 1 | 1.069860  | 1.214903  | 3.991554  |
| 6 | 3.192733  | 4.203171  | -1.164193 |
| 1 | 2.448387  | 4.979671  | -1.372583 |
| 1 | 4.173729  | 4.684391  | -1.091775 |
| 1 | 3.226185  | 3.520151  | -2.021281 |
| 6 | 3.958475  | 2.370794  | 0.385981  |
| 1 | 3.770338  | 1.817490  | 1.311241  |
| 1 | 3.983713  | 1.648666  | -0.435085 |
| 1 | 4.949814  | 2.831957  | 0.463723  |
| 6 | -0.794218 | 1.622577  | -3.349762 |
| 1 | -1.488348 | 1.555868  | -4.195246 |
| 1 | 0.054132  | 2.236548  | -3.672196 |
| 1 | -0.414916 | 0.619035  | -3.129719 |
| 6 | -1.971174 | 3.663159  | -2.413231 |
| 1 | -1.118846 | 4.326211  | -2.601185 |
| 1 | -2.620019 | 3.684742  | -3.296594 |
| 1 | -2.534496 | 4.068888  | -1.566647 |
| 6 | -4.348199 | -2.838721 | -1.513675 |
| 1 | -4.190737 | -3.733784 | -0.909662 |
| 1 | -5.166073 | -2.261176 | -1.073688 |
| 1 | -4.685363 | -3.170230 | -2.504257 |
| 6 | -1.663927 | -2.040901 | 2.506456  |
| 1 | -2.027454 | -1.079516 | 2.876996  |
| 1 | -1.717547 | -2.759200 | 3.334477  |
| 1 | -0.617801 | -1.931947 | 2.212433  |
| 6 | 2.764392  | 0.127255  | -2.653340 |
| 6 | 2.176844  | -0.572998 | -0.353536 |
| 1 | 3.346338  | 0.040413  | -3.566805 |
| 1 | 2.009511  | 0.905934  | -2.619439 |

|   |          |           |           |
|---|----------|-----------|-----------|
| 1 | 2.755094 | -0.802071 | 0.538443  |
| 1 | 1.799228 | 0.452903  | -0.238664 |
| 6 | 2.958680 | -0.702853 | -1.618277 |
| 6 | 4.012725 | -1.791553 | -1.652945 |
| 6 | 4.990174 | -1.645189 | -0.503690 |
| 6 | 4.875145 | -2.447664 | 0.637791  |
| 6 | 5.975857 | -0.650878 | -0.534653 |
| 6 | 5.731253 | -2.259358 | 1.725179  |
| 1 | 4.096875 | -3.205617 | 0.671398  |
| 6 | 6.833004 | -0.462115 | 0.548933  |
| 1 | 6.062074 | -0.015922 | -1.413464 |
| 6 | 6.711961 | -1.267071 | 1.684424  |
| 1 | 5.630276 | -2.889543 | 2.604856  |
| 1 | 7.594505 | 0.312370  | 0.508505  |
| 1 | 7.378399 | -1.121356 | 2.530243  |
| 1 | 3.513883 | -2.763723 | -1.581653 |
| 1 | 4.540736 | -1.749854 | -2.612148 |
| 6 | 1.174173 | -2.148157 | -0.254414 |
| 7 | 1.494250 | -3.282366 | -0.184345 |

#### TS5A

SCF Energy: -2678.13458569

|                                              |              |
|----------------------------------------------|--------------|
| Sum of electronic and zero-point Energies=   | -2677.428590 |
| Sum of electronic and thermal Energies=      | -2677.383192 |
| Sum of electronic and thermal Enthalpies=    | -2677.382248 |
| Sum of electronic and thermal Free Energies= | -2677.509317 |

Electronic energy in solution by single point calculation = -2676.96230161

|   |           |          |           |
|---|-----------|----------|-----------|
| 6 | -3.152234 | 2.271087 | -1.240388 |
| 6 | -2.006029 | 1.727751 | -0.642363 |
| 6 | -0.839725 | 2.501699 | -0.676729 |
| 6 | -0.758099 | 3.756885 | -1.288388 |
| 6 | -1.917775 | 4.253661 | -1.887843 |
| 6 | -3.105472 | 3.520125 | -1.856898 |
| 6 | 0.577753  | 4.502275 | -1.201067 |
| 6 | 1.691900  | 3.459171 | -1.322782 |
| 6 | 1.484137  | 2.226925 | -0.702781 |
| 6 | 2.430325  | 1.196696 | -0.680048 |
| 6 | 3.659531  | 1.435666 | -1.306877 |
| 6 | 3.898436  | 2.654832 | -1.942248 |
| 6 | 2.924161  | 3.655387 | -1.954745 |
| 1 | -4.075612 | 1.704128 | -1.241166 |
| 1 | -1.901959 | 5.219236 | -2.381007 |
| 1 | -3.999530 | 3.923329 | -2.323033 |

|    |           |           |           |
|----|-----------|-----------|-----------|
| 1  | 4.417455  | 0.660172  | -1.309977 |
| 1  | 4.851474  | 2.827270  | -2.433378 |
| 1  | 3.132159  | 4.593259  | -2.457806 |
| 8  | 0.281356  | 1.973184  | -0.071701 |
| 15 | 1.925641  | -0.405824 | 0.057894  |
| 15 | -1.933743 | 0.015664  | 0.042132  |
| 6  | 3.473088  | -1.387799 | -0.057984 |
| 6  | 4.448729  | -1.391061 | 0.949237  |
| 6  | 3.675262  | -2.155122 | -1.216368 |
| 6  | 5.609274  | -2.151100 | 0.800351  |
| 1  | 4.299596  | -0.802365 | 1.848581  |
| 6  | 4.843095  | -2.903708 | -1.364649 |
| 1  | 2.915736  | -2.177117 | -1.991379 |
| 6  | 5.809986  | -2.906055 | -0.357117 |
| 1  | 6.357438  | -2.151810 | 1.588516  |
| 1  | 4.989619  | -3.493207 | -2.265339 |
| 1  | 6.714620  | -3.497182 | -0.470780 |
| 6  | 1.813259  | -0.009121 | 1.847832  |
| 6  | 1.113851  | -0.901974 | 2.672024  |
| 6  | 2.385820  | 1.135828  | 2.416173  |
| 6  | 1.005730  | -0.666885 | 4.040202  |
| 1  | 0.637842  | -1.771985 | 2.228121  |
| 6  | 2.263961  | 1.379092  | 3.785160  |
| 1  | 2.926265  | 1.836769  | 1.787670  |
| 6  | 1.577979  | 0.477173  | 4.599367  |
| 1  | 0.449145  | -1.359051 | 4.663556  |
| 1  | 2.707876  | 2.273136  | 4.214899  |
| 1  | 1.479323  | 0.669881  | 5.663964  |
| 6  | -3.594627 | -0.630619 | -0.412400 |
| 6  | -3.681099 | -1.421445 | -1.567691 |
| 6  | -4.759936 | -0.355416 | 0.317881  |
| 6  | -4.912336 | -1.924120 | -1.989441 |
| 1  | -2.774588 | -1.652538 | -2.122602 |
| 6  | -5.989053 | -0.864571 | -0.101343 |
| 1  | -4.702961 | 0.253713  | 1.214556  |
| 6  | -6.067215 | -1.648326 | -1.255481 |
| 1  | -4.964022 | -2.540999 | -2.881771 |
| 1  | -6.886288 | -0.649049 | 0.472442  |
| 1  | -7.025188 | -2.047032 | -1.577390 |
| 6  | -2.075201 | 0.251422  | 1.859421  |
| 6  | -2.481442 | -0.842303 | 2.641865  |
| 6  | -1.707530 | 1.441304  | 2.497982  |
| 6  | -2.543723 | -0.736648 | 4.029333  |

|    |           |           |           |
|----|-----------|-----------|-----------|
| 1  | -2.768785 | -1.772257 | 2.159727  |
| 6  | -1.755867 | 1.539350  | 3.888951  |
| 1  | -1.383211 | 2.293874  | 1.912952  |
| 6  | -2.179693 | 0.456418  | 4.658242  |
| 1  | -2.875234 | -1.586636 | 4.619795  |
| 1  | -1.460519 | 2.467231  | 4.370291  |
| 1  | -2.221209 | 0.537876  | 5.740723  |
| 46 | -0.101979 | -1.311488 | -0.721842 |
| 6  | 0.678269  | 5.151064  | 0.206242  |
| 1  | 1.636922  | 5.670314  | 0.314904  |
| 1  | -0.132466 | 5.874069  | 0.349246  |
| 1  | 0.608205  | 4.393782  | 0.992777  |
| 6  | 0.696152  | 5.598895  | -2.266322 |
| 1  | -0.091932 | 6.347107  | -2.140398 |
| 1  | 1.649689  | 6.126353  | -2.170789 |
| 1  | 0.626725  | 5.186512  | -3.277995 |
| 6  | -0.631175 | -3.976806 | -1.034138 |
| 6  | -1.573026 | -3.760524 | 0.134897  |
| 1  | -1.074187 | -3.255684 | 0.965599  |
| 1  | -2.463122 | -3.205319 | -0.157018 |
| 1  | -1.892068 | -4.757514 | 0.483235  |
| 6  | 0.623895  | -4.741099 | -0.637365 |
| 1  | 0.319270  | -5.668014 | -0.128850 |
| 1  | 1.229491  | -4.992224 | -1.509193 |
| 1  | 1.234749  | -4.145611 | 0.046246  |
| 8  | -1.344493 | -4.503110 | -2.076389 |
| 1  | -0.755290 | -4.486812 | -2.857104 |
| 6  | 0.386593  | -2.593107 | -2.140767 |
| 7  | 0.791809  | -2.882103 | -3.213912 |

## TS5

SCF Energy: -1888.29844449

|                                              |              |
|----------------------------------------------|--------------|
| Sum of electronic and zero-point Energies=   | -1887.514467 |
| Sum of electronic and thermal Energies=      | -1887.469723 |
| Sum of electronic and thermal Enthalpies=    | -1887.468778 |
| Sum of electronic and thermal Free Energies= | -1887.589507 |

Electronic energy in solution by single point calculation = -1887.38226623

|    |          |           |           |
|----|----------|-----------|-----------|
| 46 | 0.322848 | -1.222880 | 0.333407  |
| 6  | 2.037408 | -3.087329 | -0.726171 |
| 6  | 1.741726 | -2.404952 | -2.044090 |
| 1  | 0.672686 | -2.363710 | -2.244397 |
| 1  | 2.158940 | -1.396991 | -2.071862 |
| 1  | 2.232337 | -2.997301 | -2.833757 |

|    |           |           |           |
|----|-----------|-----------|-----------|
| 6  | 1.242064  | -4.343033 | -0.425716 |
| 1  | 1.504431  | -5.101079 | -1.179624 |
| 1  | 1.484588  | -4.734764 | 0.564373  |
| 1  | 0.170138  | -4.141644 | -0.465963 |
| 8  | 3.397665  | -3.253094 | -0.658002 |
| 1  | 3.624259  | -3.506145 | 0.256941  |
| 6  | 1.912892  | -2.112230 | 1.063299  |
| 7  | 2.615954  | -2.408237 | 1.964768  |
| 15 | -1.920177 | -0.628638 | -0.171528 |
| 6  | -2.271516 | 1.184394  | 0.019416  |
| 6  | -1.222319 | 2.128828  | 0.169572  |
| 6  | -3.597494 | 1.653044  | 0.047361  |
| 6  | -1.556171 | 3.482666  | 0.343762  |
| 6  | 0.242053  | 1.794000  | 0.194215  |
| 6  | -3.907102 | 2.999530  | 0.217074  |
| 1  | -4.411243 | 0.949088  | -0.062732 |
| 6  | -2.875498 | 3.924011  | 0.366783  |
| 1  | -0.748751 | 4.195303  | 0.476374  |
| 6  | 0.833972  | 1.351663  | 1.404838  |
| 6  | 1.055196  | 2.027939  | -0.938221 |
| 1  | -4.945058 | 3.319255  | 0.235487  |
| 1  | -3.093732 | 4.978834  | 0.506948  |
| 6  | 2.208818  | 1.078423  | 1.424795  |
| 6  | 2.424478  | 1.751951  | -0.858184 |
| 6  | 3.018120  | 1.255920  | 0.303269  |
| 1  | 2.658954  | 0.702750  | 2.336855  |
| 1  | 3.045677  | 1.930859  | -1.730363 |
| 6  | -2.493474 | -1.002403 | -1.955222 |
| 6  | -3.064949 | -1.532116 | 1.080839  |
| 6  | -4.539520 | -1.722752 | 0.691251  |
| 1  | -5.050087 | -2.250926 | 1.506951  |
| 1  | -5.070041 | -0.779447 | 0.542072  |
| 1  | -4.656466 | -2.331128 | -0.208611 |
| 6  | -2.445551 | -2.928078 | 1.310062  |
| 1  | -2.462551 | -3.542265 | 0.405618  |
| 1  | -1.404541 | -2.848121 | 1.639468  |
| 1  | -3.020050 | -3.454582 | 2.083624  |
| 6  | -1.456683 | -0.310821 | -2.854833 |
| 1  | -0.436888 | -0.590128 | -2.584686 |
| 1  | -1.629541 | -0.587628 | -3.902824 |
| 1  | -1.537255 | 0.775851  | -2.778582 |
| 6  | -2.414304 | -2.522859 | -2.175309 |
| 1  | -1.454396 | -2.927470 | -1.839603 |

|   |           |           |           |
|---|-----------|-----------|-----------|
| 1 | -3.209589 | -3.058506 | -1.649696 |
| 1 | -2.520803 | -2.742230 | -3.245342 |
| 6 | 0.045814  | 1.339975  | 2.710208  |
| 1 | -1.014626 | 1.259250  | 2.460190  |
| 6 | 0.505351  | 2.646557  | -2.218139 |
| 1 | -0.582684 | 2.530374  | -2.210478 |
| 6 | 4.502580  | 0.944532  | 0.364078  |
| 1 | 4.695067  | 0.482893  | 1.340731  |
| 6 | 0.237379  | 2.687293  | 3.433435  |
| 1 | -0.347008 | 2.713041  | 4.360953  |
| 1 | 1.292251  | 2.839784  | 3.689710  |
| 1 | -0.082595 | 3.524889  | 2.805452  |
| 6 | 0.397389  | 0.175043  | 3.645236  |
| 1 | -0.279473 | 0.173486  | 4.507760  |
| 1 | 0.321275  | -0.788485 | 3.133007  |
| 1 | 1.419209  | 0.252952  | 4.030907  |
| 6 | 5.338424  | 2.233583  | 0.274579  |
| 1 | 5.061822  | 2.940279  | 1.064763  |
| 1 | 6.407741  | 2.011129  | 0.370047  |
| 1 | 5.184693  | 2.733279  | -0.689615 |
| 6 | 4.923778  | -0.065124 | -0.715419 |
| 1 | 4.365682  | -1.000903 | -0.624725 |
| 1 | 4.756745  | 0.338009  | -1.722021 |
| 1 | 5.992479  | -0.294462 | -0.626628 |
| 6 | 1.046018  | 1.982734  | -3.495953 |
| 1 | 0.493593  | 2.343314  | -4.371156 |
| 1 | 2.102110  | 2.225283  | -3.657481 |
| 1 | 0.956081  | 0.894229  | -3.457611 |
| 6 | 0.804910  | 4.157748  | -2.257541 |
| 1 | 1.886470  | 4.334138  | -2.230573 |
| 1 | 0.408997  | 4.607324  | -3.176139 |
| 1 | 0.359969  | 4.678857  | -1.405306 |
| 6 | -3.880014 | -0.487114 | -2.372416 |
| 1 | -4.694017 | -0.915678 | -1.786115 |
| 1 | -3.939071 | 0.601993  | -2.303856 |
| 1 | -4.053749 | -0.758660 | -3.422041 |
| 6 | -2.995035 | -0.764877 | 2.412395  |
| 1 | -3.434111 | 0.233821  | 2.340336  |
| 1 | -3.547632 | -1.325021 | 3.177359  |
| 1 | -1.964046 | -0.665400 | 2.757175  |

## TS6A

SCF Energy: -2678.13620702

Sum of electronic and zero-point Energies= -2677.434036  
 Sum of electronic and thermal Energies= -2677.388674  
 Sum of electronic and thermal Enthalpies= -2677.387730  
 Sum of electronic and thermal Free Energies= -2677.514619  
 Electronic energy in solution by single point calculation = -2676.97190686

|    |           |           |           |
|----|-----------|-----------|-----------|
| 6  | -3.943337 | 0.014315  | -1.415143 |
| 6  | -2.726257 | 0.266243  | -0.765592 |
| 6  | -2.227798 | 1.572704  | -0.828452 |
| 6  | -2.852234 | 2.612393  | -1.523480 |
| 6  | -4.054428 | 2.315777  | -2.170793 |
| 6  | -4.598758 | 1.031552  | -2.107618 |
| 6  | -2.189313 | 3.993983  | -1.479048 |
| 6  | -0.674036 | 3.773358  | -1.517433 |
| 6  | -0.170309 | 2.680631  | -0.812257 |
| 6  | 1.189262  | 2.373101  | -0.712495 |
| 6  | 2.093925  | 3.231229  | -1.348875 |
| 6  | 1.625976  | 4.333552  | -2.066177 |
| 6  | 0.257240  | 4.600203  | -2.154257 |
| 1  | -4.365258 | -0.983371 | -1.397110 |
| 1  | -4.574511 | 3.086891  | -2.728179 |
| 1  | -5.536906 | 0.819553  | -2.611609 |
| 1  | 3.157022  | 3.023342  | -1.293309 |
| 1  | 2.333036  | 4.990172  | -2.564236 |
| 1  | -0.080415 | 5.460407  | -2.721813 |
| 8  | -1.040409 | 1.819245  | -0.171887 |
| 15 | 1.628918  | 0.809855  | 0.140235  |
| 15 | -1.686395 | -1.061050 | -0.015524 |
| 6  | 3.451482  | 0.740500  | -0.029128 |
| 6  | 4.322579  | 1.484949  | 0.780327  |
| 6  | 3.977259  | -0.117915 | -1.007463 |
| 6  | 5.701581  | 1.375073  | 0.606295  |
| 1  | 3.920552  | 2.139857  | 1.547716  |
| 6  | 5.359134  | -0.231914 | -1.172036 |
| 1  | 3.307949  | -0.721640 | -1.615164 |
| 6  | 6.219889  | 0.515991  | -0.367483 |
| 1  | 6.372758  | 1.952426  | 1.236530  |
| 1  | 5.750863  | -0.928602 | -1.906493 |
| 1  | 7.295480  | 0.422277  | -0.489638 |
| 6  | 1.384206  | 1.222754  | 1.909847  |
| 6  | 1.424685  | 0.165657  | 2.829952  |
| 6  | 1.172052  | 2.526324  | 2.374549  |
| 6  | 1.279257  | 0.411726  | 4.192598  |
| 1  | 1.558800  | -0.850584 | 2.470713  |

|    |           |           |           |
|----|-----------|-----------|-----------|
| 6  | 1.010858  | 2.768936  | 3.739809  |
| 1  | 1.135320  | 3.351466  | 1.670316  |
| 6  | 1.070070  | 1.714236  | 4.650801  |
| 1  | 1.306725  | -0.415625 | 4.894759  |
| 1  | 0.844531  | 3.783993  | 4.090501  |
| 1  | 0.945374  | 1.903975  | 5.713263  |
| 6  | -2.756831 | -2.541956 | -0.247345 |
| 6  | -2.466774 | -3.447411 | -1.274307 |
| 6  | -3.884833 | -2.761926 | 0.558847  |
| 6  | -3.288292 | -4.553712 | -1.496760 |
| 1  | -1.588089 | -3.281601 | -1.890927 |
| 6  | -4.701239 | -3.870655 | 0.341003  |
| 1  | -4.120141 | -2.066127 | 1.358080  |
| 6  | -4.404574 | -4.768626 | -0.687719 |
| 1  | -3.050372 | -5.249652 | -2.296183 |
| 1  | -5.568422 | -4.034710 | 0.974623  |
| 1  | -5.039839 | -5.634079 | -0.854023 |
| 6  | -1.814071 | -0.810917 | 1.800376  |
| 6  | -1.407819 | -1.872563 | 2.625239  |
| 6  | -2.256057 | 0.378037  | 2.388752  |
| 6  | -1.467540 | -1.753840 | 4.010709  |
| 1  | -1.057759 | -2.797903 | 2.175431  |
| 6  | -2.296026 | 0.501525  | 3.778737  |
| 1  | -2.572507 | 1.207986  | 1.768540  |
| 6  | -1.910628 | -0.562936 | 4.591721  |
| 1  | -1.162262 | -2.587348 | 4.637400  |
| 1  | -2.630578 | 1.433930  | 4.224084  |
| 1  | -1.947184 | -0.464256 | 5.672856  |
| 46 | 0.462005  | -1.165155 | -0.707468 |
| 6  | -2.545431 | 4.659376  | -0.122076 |
| 1  | -2.062082 | 5.639445  | -0.043791 |
| 1  | -3.629595 | 4.793682  | -0.038835 |
| 1  | -2.208578 | 4.043551  | 0.717096  |
| 6  | -2.667949 | 4.898806  | -2.620778 |
| 1  | -3.747107 | 5.065909  | -2.555636 |
| 1  | -2.192181 | 5.881744  | -2.557055 |
| 1  | -2.440937 | 4.465613  | -3.600161 |
| 6  | 2.516207  | -3.522743 | -1.196435 |
| 6  | 2.677762  | -3.254715 | 0.314390  |
| 1  | 3.230419  | -4.061963 | 0.808608  |
| 1  | 3.207736  | -2.313263 | 0.476248  |
| 1  | 1.678164  | -3.179107 | 0.758683  |
| 6  | 1.813026  | -4.872555 | -1.435912 |

|   |          |           |           |
|---|----------|-----------|-----------|
| 1 | 0.814740 | -4.829387 | -0.985422 |
| 1 | 1.706951 | -5.050496 | -2.509295 |
| 1 | 2.365434 | -5.705375 | -0.987554 |
| 8 | 1.852865 | -2.482398 | -1.876772 |
| 1 | 0.416132 | -2.544535 | -1.500742 |
| 6 | 3.879125 | -3.570441 | -1.796665 |
| 7 | 4.944395 | -3.569287 | -2.259354 |

**TS6B**

SCF Energy: -2872.07936979

|                                              |              |
|----------------------------------------------|--------------|
| Sum of electronic and zero-point Energies=   | -2871.289247 |
| Sum of electronic and thermal Energies=      | -2871.240636 |
| Sum of electronic and thermal Enthalpies=    | -2871.239692 |
| Sum of electronic and thermal Free Energies= | -2871.372315 |

Electronic energy in solution by single point calculation = -2870.74090255

|    |           |           |           |
|----|-----------|-----------|-----------|
| 6  | 0.225148  | -4.026492 | -0.934069 |
| 6  | -0.209942 | -2.780714 | -0.458047 |
| 6  | -1.585181 | -2.614948 | -0.269780 |
| 6  | -2.538286 | -3.592095 | -0.575944 |
| 6  | -2.065548 | -4.808518 | -1.073086 |
| 6  | -0.695669 | -5.027503 | -1.237663 |
| 6  | -4.007716 | -3.266645 | -0.286467 |
| 6  | -4.217647 | -1.781040 | -0.593414 |
| 6  | -3.180090 | -0.908624 | -0.267971 |
| 6  | -3.243137 | 0.477460  | -0.427400 |
| 6  | -4.431168 | 1.016433  | -0.934154 |
| 6  | -5.488370 | 0.172926  | -1.280419 |
| 6  | -5.383257 | -1.210467 | -1.115971 |
| 1  | 1.283353  | -4.202773 | -1.086104 |
| 1  | -2.764191 | -5.597019 | -1.330201 |
| 1  | -0.345218 | -5.984048 | -1.613591 |
| 1  | -4.517387 | 2.088815  | -1.070491 |
| 1  | -6.403804 | 0.596823  | -1.682190 |
| 1  | -6.219218 | -1.843068 | -1.393661 |
| 8  | -1.996480 | -1.405649 | 0.241749  |
| 15 | -1.720976 | 1.430292  | -0.048228 |
| 15 | 0.918541  | -1.344704 | -0.182582 |
| 6  | -2.308290 | 3.161481  | -0.207058 |
| 6  | -2.851279 | 3.871783  | 0.873975  |
| 6  | -2.230679 | 3.774764  | -1.467030 |
| 6  | -3.311251 | 5.176354  | 0.696219  |
| 1  | -2.912644 | 3.407191  | 1.852362  |
| 6  | -2.699819 | 5.077690  | -1.639296 |

|    |           |           |           |
|----|-----------|-----------|-----------|
| 1  | -1.778854 | 3.252070  | -2.302840 |
| 6  | -3.239020 | 5.780715  | -0.560760 |
| 1  | -3.726223 | 5.720334  | 1.540486  |
| 1  | -2.628031 | 5.544111  | -2.617604 |
| 1  | -3.596271 | 6.797968  | -0.696311 |
| 6  | -1.553859 | 1.211114  | 1.768280  |
| 6  | -0.308580 | 1.484615  | 2.349660  |
| 6  | -2.611556 | 0.794847  | 2.587042  |
| 6  | -0.127593 | 1.362823  | 3.725455  |
| 1  | 0.524267  | 1.772911  | 1.715788  |
| 6  | -2.425156 | 0.657272  | 3.962978  |
| 1  | -3.580504 | 0.577876  | 2.148324  |
| 6  | -1.184474 | 0.944044  | 4.534536  |
| 1  | 0.846355  | 1.563419  | 4.158656  |
| 1  | -3.250792 | 0.327772  | 4.588037  |
| 1  | -1.038885 | 0.832822  | 5.605353  |
| 6  | 2.450921  | -1.997020 | -0.966529 |
| 6  | 2.554434  | -1.869939 | -2.361724 |
| 6  | 3.490911  | -2.616400 | -0.263627 |
| 6  | 3.680158  | -2.339543 | -3.036871 |
| 1  | 1.745661  | -1.401181 | -2.917520 |
| 6  | 4.617857  | -3.085917 | -0.940124 |
| 1  | 3.426110  | -2.726083 | 0.812898  |
| 6  | 4.719522  | -2.943379 | -2.324729 |
| 1  | 3.747246  | -2.228387 | -4.115297 |
| 1  | 5.418490  | -3.562554 | -0.381259 |
| 1  | 5.601091  | -3.303546 | -2.847365 |
| 6  | 1.293508  | -1.408154 | 1.610551  |
| 6  | 2.392383  | -0.669233 | 2.078571  |
| 6  | 0.494741  | -2.102233 | 2.525560  |
| 6  | 2.704579  | -0.657707 | 3.435532  |
| 1  | 3.010569  | -0.112443 | 1.383595  |
| 6  | 0.797184  | -2.067814 | 3.887595  |
| 1  | -0.361905 | -2.669767 | 2.178846  |
| 6  | 1.906409  | -1.356263 | 4.345011  |
| 1  | 3.569718  | -0.095537 | 3.774353  |
| 1  | 0.165364  | -2.603554 | 4.590385  |
| 1  | 2.143985  | -1.340078 | 5.405119  |
| 46 | 0.311478  | 0.833609  | -1.126405 |
| 6  | -4.259586 | -3.482538 | 1.230648  |
| 1  | -5.295490 | -3.228526 | 1.481103  |
| 1  | -4.078273 | -4.529013 | 1.499943  |
| 1  | -3.597291 | -2.851794 | 1.831221  |

|   |           |           |           |
|---|-----------|-----------|-----------|
| 6 | -4.963425 | -4.160301 | -1.086163 |
| 1 | -4.816929 | -5.213080 | -0.827458 |
| 1 | -6.003748 | -3.919349 | -0.849085 |
| 1 | -4.816486 | -4.042700 | -2.164575 |
| 1 | 2.765958  | 3.447997  | -2.953605 |
| 6 | 0.529520  | 2.104424  | -2.610060 |
| 7 | 0.203632  | 2.779420  | -3.519816 |
| 6 | 2.240072  | 1.500308  | -1.972596 |
| 6 | 3.175447  | 2.557369  | -2.488200 |
| 6 | 2.993505  | 2.406809  | -0.990995 |
| 1 | 2.641258  | 0.504977  | -2.115252 |
| 1 | 4.099723  | 2.195933  | -2.934218 |
| 6 | 4.066240  | 1.770476  | -0.157234 |
| 6 | 4.312974  | 2.205843  | 1.155533  |
| 6 | 4.836296  | 0.696970  | -0.638761 |
| 6 | 5.277184  | 1.590266  | 1.956017  |
| 1 | 3.744068  | 3.031540  | 1.566081  |
| 6 | 5.795553  | 0.079200  | 0.159440  |
| 1 | 4.676357  | 0.316664  | -1.642369 |
| 6 | 6.020845  | 0.517832  | 1.465764  |
| 1 | 5.443087  | 1.953940  | 2.966917  |
| 1 | 6.358763  | -0.757574 | -0.241890 |
| 1 | 6.766450  | 0.032533  | 2.089015  |
| 6 | 2.209566  | 3.534217  | -0.334730 |
| 1 | 1.707878  | 3.201774  | 0.580233  |
| 1 | 2.875049  | 4.367576  | -0.078253 |
| 1 | 1.440035  | 3.909105  | -1.011051 |

## TS6

SCF Energy: -1988.77010553

|                                              |              |
|----------------------------------------------|--------------|
| Sum of electronic and zero-point Energies=   | -1987.924298 |
| Sum of electronic and thermal Energies=      | -1987.878639 |
| Sum of electronic and thermal Enthalpies=    | -1987.877695 |
| Sum of electronic and thermal Free Energies= | -1988.000606 |

Electronic energy in solution by single point calculation = -1987.72605525

|    |           |           |           |
|----|-----------|-----------|-----------|
| 46 | -0.536080 | -0.829148 | -0.256384 |
| 15 | -1.056069 | 1.460962  | -0.053598 |
| 6  | 0.423674  | 2.547168  | 0.258572  |
| 6  | 1.744813  | 2.037617  | 0.323690  |
| 6  | 0.240831  | 3.927807  | 0.468180  |
| 6  | 2.801130  | 2.931942  | 0.582866  |
| 6  | 2.186869  | 0.604131  | 0.189821  |
| 6  | 1.297019  | 4.795533  | 0.725991  |

|   |           |           |           |
|---|-----------|-----------|-----------|
| 1 | -0.756734 | 4.339437  | 0.426842  |
| 6 | 2.594798  | 4.292428  | 0.780767  |
| 1 | 3.806892  | 2.527207  | 0.639278  |
| 6 | 2.285295  | -0.197069 | 1.350803  |
| 6 | 2.760541  | 0.149079  | -1.019183 |
| 1 | 1.103670  | 5.852900  | 0.882760  |
| 1 | 3.437249  | 4.948083  | 0.981724  |
| 6 | 2.936771  | -1.430712 | 1.273354  |
| 6 | 3.386832  | -1.100280 | -1.050352 |
| 6 | 3.490486  | -1.907209 | 0.084954  |
| 1 | 3.032130  | -2.035113 | 2.171480  |
| 1 | 3.824517  | -1.443302 | -1.983096 |
| 6 | -1.756771 | 2.108977  | -1.717586 |
| 6 | -2.293634 | 1.871117  | 1.359481  |
| 6 | -3.082751 | 3.186131  | 1.246672  |
| 1 | -3.770003 | 3.249272  | 2.100308  |
| 1 | -2.446033 | 4.072934  | 1.287816  |
| 1 | -3.690163 | 3.236309  | 0.341036  |
| 6 | -3.293348 | 0.699895  | 1.423414  |
| 1 | -3.899030 | 0.605338  | 0.520717  |
| 1 | -2.774991 | -0.248385 | 1.571356  |
| 1 | -3.975921 | 0.860374  | 2.268519  |
| 6 | -0.836964 | 1.514310  | -2.797137 |
| 1 | -0.791487 | 0.422320  | -2.719186 |
| 1 | -1.219197 | 1.776174  | -3.792607 |
| 1 | 0.178797  | 1.906583  | -2.716566 |
| 6 | -3.162202 | 1.522292  | -1.920639 |
| 1 | -3.175362 | 0.446545  | -1.741231 |
| 1 | -3.910817 | 1.982456  | -1.271263 |
| 1 | -3.475595 | 1.699068  | -2.958097 |
| 6 | 1.788221  | 0.294518  | 2.701338  |
| 1 | 1.156316  | 1.166114  | 2.523472  |
| 6 | 2.774524  | 1.006604  | -2.276127 |
| 1 | 2.081462  | 1.837844  | -2.119357 |
| 6 | 4.216969  | -3.240907 | 0.045304  |
| 1 | 4.149525  | -3.676630 | 1.051224  |
| 6 | 2.969126  | 0.759111  | 3.572365  |
| 1 | 2.610802  | 1.141155  | 4.535694  |
| 1 | 3.659440  | -0.069180 | 3.770949  |
| 1 | 3.532869  | 1.556837  | 3.077483  |
| 6 | 0.936128  | -0.750828 | 3.436299  |
| 1 | 0.521594  | -0.321003 | 4.355725  |
| 1 | 0.109134  | -1.092073 | 2.806103  |

|   |           |           |           |
|---|-----------|-----------|-----------|
| 1 | 1.527697  | -1.627012 | 3.725751  |
| 6 | 5.708315  | -3.048910 | -0.281162 |
| 1 | 6.182976  | -2.366467 | 0.432021  |
| 1 | 6.239879  | -4.007136 | -0.248422 |
| 1 | 5.838985  | -2.627578 | -1.284799 |
| 6 | 3.561816  | -4.229284 | -0.933849 |
| 1 | 2.514548  | -4.408393 | -0.671773 |
| 1 | 3.589436  | -3.844102 | -1.959934 |
| 1 | 4.090754  | -5.189495 | -0.923353 |
| 6 | 2.311307  | 0.229203  | -3.519128 |
| 1 | 2.177479  | 0.910579  | -4.367161 |
| 1 | 3.048844  | -0.523959 | -3.818291 |
| 1 | 1.363431  | -0.284007 | -3.334673 |
| 6 | 4.168854  | 1.615991  | -2.509746 |
| 1 | 4.921131  | 0.828233  | -2.633500 |
| 1 | 4.173413  | 2.235450  | -3.414559 |
| 1 | 4.473749  | 2.243263  | -1.666432 |
| 6 | -1.796515 | 3.631446  | -1.917700 |
| 1 | -2.417439 | 4.143221  | -1.179147 |
| 1 | -0.796214 | 4.071018  | -1.894144 |
| 1 | -2.225579 | 3.841776  | -2.906243 |
| 6 | -1.503919 | 1.880424  | 2.678438  |
| 1 | -0.771045 | 2.691247  | 2.721471  |
| 1 | -2.205093 | 2.012299  | 3.512393  |
| 1 | -0.986238 | 0.931732  | 2.829557  |
| 6 | 0.062080  | -3.436138 | 0.920092  |
| 6 | 0.155717  | -2.875607 | -0.503650 |
| 1 | -0.098169 | -4.509372 | 1.055623  |
| 1 | 0.860163  | -3.049826 | 1.553001  |
| 1 | -0.260143 | -3.485719 | -1.300745 |
| 1 | 1.107293  | -2.397885 | -0.758956 |
| 6 | -1.115415 | -2.581933 | 0.717372  |
| 6 | -2.409458 | -2.924365 | 0.934004  |
| 1 | -2.578376 | -3.632258 | 1.750984  |
| 6 | -3.621411 | -2.468156 | 0.260415  |
| 6 | -4.852645 | -2.507459 | 0.941480  |
| 6 | -3.622385 | -2.029637 | -1.077255 |
| 6 | -6.030764 | -2.088459 | 0.328738  |
| 1 | -4.872089 | -2.856366 | 1.971361  |
| 6 | -4.803751 | -1.625697 | -1.695142 |
| 1 | -2.682953 | -2.011066 | -1.620663 |
| 6 | -6.012788 | -1.641383 | -0.994939 |
| 1 | -6.965585 | -2.113629 | 0.882607  |

|   |           |           |           |
|---|-----------|-----------|-----------|
| 1 | -4.781982 | -1.296846 | -2.731032 |
| 1 | -6.931570 | -1.322712 | -1.479258 |

**TS7B**

SCF Energy: -3696.060339

|                                              |              |
|----------------------------------------------|--------------|
| Sum of electronic and zero-point Energies=   | -3694.971788 |
| Sum of electronic and thermal Energies=      | -3694.903044 |
| Sum of electronic and thermal Enthalpies=    | -3694.902100 |
| Sum of electronic and thermal Free Energies= | -3695.081346 |

Electronic energy in solution by single point calculation = -3694.41506164

|    |           |           |           |
|----|-----------|-----------|-----------|
| 6  | -2.604334 | 3.644386  | -2.201540 |
| 6  | -2.402814 | 2.566385  | -1.326257 |
| 6  | -2.671221 | 2.787608  | 0.032730  |
| 6  | -3.108679 | 4.017002  | 0.538621  |
| 6  | -3.286478 | 5.064709  | -0.367163 |
| 6  | -3.042536 | 4.878011  | -1.727699 |
| 6  | -3.409773 | 4.105829  | 2.036024  |
| 6  | -2.372946 | 3.249107  | 2.763990  |
| 6  | -1.996201 | 2.045939  | 2.161598  |
| 6  | -1.159825 | 1.108700  | 2.780914  |
| 6  | -0.657931 | 1.421080  | 4.050523  |
| 6  | -0.982780 | 2.632378  | 4.658392  |
| 6  | -1.836293 | 3.535291  | 4.022531  |
| 1  | -2.388542 | 3.524167  | -3.256001 |
| 1  | -3.617333 | 6.034839  | -0.014376 |
| 1  | -3.186037 | 5.701430  | -2.420831 |
| 1  | -0.001187 | 0.717955  | 4.550321  |
| 1  | -0.576522 | 2.871261  | 5.636452  |
| 1  | -2.089539 | 4.465256  | 4.518926  |
| 8  | -2.479870 | 1.730906  | 0.904972  |
| 15 | -0.718763 | -0.430390 | 1.891189  |
| 15 | -1.619537 | 0.986137  | -1.863773 |
| 6  | 0.507283  | -1.232722 | 2.988674  |
| 6  | 0.166640  | -2.201480 | 3.943075  |
| 6  | 1.856271  | -0.892607 | 2.802424  |
| 6  | 1.168420  | -2.834225 | 4.682079  |
| 1  | -0.873273 | -2.471034 | 4.097312  |
| 6  | 2.854101  | -1.523381 | 3.541805  |
| 1  | 2.144795  | -0.154724 | 2.064099  |
| 6  | 2.510186  | -2.501834 | 4.478053  |
| 1  | 0.898893  | -3.590820 | 5.414171  |
| 1  | 3.885864  | -1.255675 | 3.339635  |
| 1  | 3.285688  | -3.008637 | 5.045983  |

|    |           |           |           |
|----|-----------|-----------|-----------|
| 6  | -2.234266 | -1.460741 | 2.043078  |
| 6  | -2.182674 | -2.794633 | 1.607859  |
| 6  | -3.459470 | -0.947429 | 2.487742  |
| 6  | -3.325318 | -3.588825 | 1.593405  |
| 1  | -1.243149 | -3.219809 | 1.282310  |
| 6  | -4.605858 | -1.745159 | 2.478606  |
| 1  | -3.522831 | 0.072559  | 2.849013  |
| 6  | -4.545509 | -3.063462 | 2.025927  |
| 1  | -3.257979 | -4.613644 | 1.239512  |
| 1  | -5.547527 | -1.331881 | 2.830003  |
| 1  | -5.440640 | -3.678983 | 2.014809  |
| 6  | -0.983170 | 1.381247  | -3.537582 |
| 6  | 0.404591  | 1.543776  | -3.668616 |
| 6  | -1.798441 | 1.536674  | -4.671014 |
| 6  | 0.966690  | 1.858335  | -4.906971 |
| 1  | 1.041866  | 1.421179  | -2.798354 |
| 6  | -1.234459 | 1.843485  | -5.908760 |
| 1  | -2.873601 | 1.410560  | -4.583908 |
| 6  | 0.148844  | 2.005132  | -6.027811 |
| 1  | 2.042348  | 1.981105  | -4.989457 |
| 1  | -1.873726 | 1.957847  | -6.779862 |
| 1  | 0.585964  | 2.243291  | -6.993442 |
| 6  | -2.995295 | -0.192980 | -2.150437 |
| 6  | -2.968442 | -1.089933 | -3.231523 |
| 6  | -3.945679 | -0.392795 | -1.134351 |
| 6  | -3.880750 | -2.145713 | -3.302694 |
| 1  | -2.232437 | -0.967949 | -4.019112 |
| 6  | -4.848859 | -1.449872 | -1.206841 |
| 1  | -3.951149 | 0.253370  | -0.264101 |
| 6  | -4.820828 | -2.332688 | -2.289675 |
| 1  | -3.849592 | -2.823200 | -4.152249 |
| 1  | -5.561335 | -1.595976 | -0.401665 |
| 1  | -5.523111 | -3.159746 | -2.339662 |
| 46 | -0.016927 | -0.028912 | -0.279214 |
| 6  | -4.808160 | 3.477671  | 2.286634  |
| 1  | -5.041299 | 3.488305  | 3.357102  |
| 1  | -5.578815 | 4.043512  | 1.751787  |
| 1  | -4.841028 | 2.441160  | 1.937534  |
| 6  | -3.419061 | 5.554305  | 2.539962  |
| 1  | -4.190657 | 6.136645  | 2.028383  |
| 1  | -3.656254 | 5.588700  | 3.607128  |
| 1  | -2.451953 | 6.042223  | 2.382169  |
| 1  | 1.763820  | -1.489566 | -1.682947 |

|    |           |           |           |
|----|-----------|-----------|-----------|
| 6  | 1.472983  | 1.371887  | -0.018737 |
| 7  | 2.624146  | 1.605706  | -0.013547 |
| 13 | 4.274072  | 0.597887  | -0.033185 |
| 8  | 4.719549  | 0.295484  | 1.629252  |
| 8  | 3.719338  | -0.894115 | -0.799947 |
| 8  | 5.421805  | 1.571328  | -0.918558 |
| 6  | 5.378483  | 1.167427  | 2.523682  |
| 6  | 4.512478  | -2.015193 | -1.137200 |
| 6  | 5.099735  | 2.547900  | -1.881741 |
| 6  | 5.204714  | -2.607872 | 0.094757  |
| 1  | 4.470298  | -2.826023 | 0.876928  |
| 1  | 5.736577  | -3.533129 | -0.160507 |
| 1  | 5.922293  | -1.894337 | 0.513517  |
| 6  | 5.515718  | -1.672802 | -2.242756 |
| 1  | 4.989402  | -1.279398 | -3.118683 |
| 1  | 6.213408  | -0.900850 | -1.900177 |
| 1  | 6.088188  | -2.558259 | -2.546336 |
| 6  | 6.874518  | 1.233070  | 2.203611  |
| 1  | 7.018537  | 1.652881  | 1.202265  |
| 1  | 7.413791  | 1.852924  | 2.931392  |
| 1  | 7.305612  | 0.225825  | 2.219138  |
| 6  | 4.742044  | 2.561555  | 2.530131  |
| 1  | 4.876795  | 3.043954  | 1.554746  |
| 1  | 3.667537  | 2.489411  | 2.729578  |
| 1  | 5.198702  | 3.201640  | 3.295308  |
| 6  | 4.534748  | 1.906830  | -3.156299 |
| 1  | 5.278354  | 1.237696  | -3.603981 |
| 1  | 3.645107  | 1.310665  | -2.923514 |
| 1  | 4.261385  | 2.671486  | -3.895578 |
| 6  | 6.352917  | 3.371241  | -2.179138 |
| 1  | 7.136484  | 2.723259  | -2.589607 |
| 1  | 6.146794  | 4.172066  | -2.900114 |
| 1  | 6.733875  | 3.820214  | -1.255918 |
| 1  | 3.825808  | -2.781737 | -1.537170 |
| 1  | 5.259616  | 0.740083  | 3.534079  |
| 1  | 4.328062  | 3.228265  | -1.480231 |
| 6  | -0.342244 | -1.905008 | -1.037643 |
| 6  | 0.724503  | -1.614515 | -1.982263 |
| 6  | 0.304368  | -3.129907 | -0.627372 |
| 1  | -1.336310 | -2.023292 | -1.451950 |
| 1  | 0.504195  | -1.592190 | -3.047451 |
| 6  | -0.344085 | -4.419122 | -0.919079 |
| 6  | 0.032849  | -5.577485 | -0.207062 |

|   |           |           |           |
|---|-----------|-----------|-----------|
| 6 | -1.403459 | -4.534268 | -1.845765 |
| 6 | -0.633790 | -6.785933 | -0.395011 |
| 1 | 0.835381  | -5.526909 | 0.518923  |
| 6 | -2.060378 | -5.743285 | -2.036331 |
| 1 | -1.712357 | -3.676905 | -2.430622 |
| 6 | -1.684230 | -6.876345 | -1.308820 |
| 1 | -0.330540 | -7.658516 | 0.176263  |
| 1 | -2.871475 | -5.801139 | -2.756511 |
| 1 | -2.202085 | -7.819497 | -1.456783 |
| 6 | 1.513479  | -3.116994 | 0.261626  |
| 1 | 1.200025  | -3.315290 | 1.295391  |
| 1 | 2.239136  | -3.884733 | -0.020720 |
| 1 | 2.010345  | -2.145965 | 0.264897  |

### TS7

SCF Energy: -1888.28660242

|                                              |              |
|----------------------------------------------|--------------|
| Sum of electronic and zero-point Energies=   | -1887.506334 |
| Sum of electronic and thermal Energies=      | -1887.462027 |
| Sum of electronic and thermal Enthalpies=    | -1887.461083 |
| Sum of electronic and thermal Free Energies= | -1887.579929 |

Electronic energy in solution by single point calculation = -1887.36091657

|    |           |           |           |
|----|-----------|-----------|-----------|
| 46 | 0.569796  | -0.927170 | 0.617153  |
| 6  | 2.921778  | -2.694441 | -0.619052 |
| 6  | 3.204086  | -4.144549 | -1.049290 |
| 1  | 4.063642  | -4.201256 | -1.725730 |
| 1  | 3.397935  | -4.763333 | -0.169828 |
| 1  | 2.317646  | -4.530297 | -1.562066 |
| 6  | 2.653844  | -1.802716 | -1.845012 |
| 1  | 1.802209  | -2.212004 | -2.396012 |
| 1  | 2.404734  | -0.786900 | -1.520537 |
| 1  | 3.522512  | -1.761071 | -2.512021 |
| 8  | 1.842747  | -2.736231 | 0.278581  |
| 1  | 2.030601  | -1.393313 | 0.998974  |
| 15 | -1.743209 | -1.032599 | -0.122199 |
| 6  | -2.611380 | 0.604313  | -0.108137 |
| 6  | -1.872779 | 1.811409  | 0.029589  |
| 6  | -4.009289 | 0.686710  | -0.215447 |
| 6  | -2.571143 | 3.027357  | 0.078442  |
| 6  | -0.379170 | 1.841187  | 0.139089  |
| 6  | -4.684547 | 1.904765  | -0.171135 |
| 1  | -4.587115 | -0.221113 | -0.334360 |
| 6  | -3.959144 | 3.084325  | -0.019452 |
| 1  | -2.003380 | 3.943194  | 0.203875  |

|   |           |           |           |
|---|-----------|-----------|-----------|
| 6 | 0.224588  | 1.314682  | 1.338712  |
| 6 | 0.425969  | 2.341909  | -0.885099 |
| 1 | -5.767478 | 1.927844  | -0.252475 |
| 1 | -4.467317 | 4.043319  | 0.024739  |
| 6 | 1.632242  | 1.208597  | 1.384824  |
| 6 | 1.836418  | 2.282618  | -0.749666 |
| 6 | 2.455697  | 1.698412  | 0.336000  |
| 1 | 2.111513  | 0.905249  | 2.309557  |
| 1 | 2.447005  | 2.689955  | -1.547298 |
| 6 | -1.847604 | -1.562697 | -1.945273 |
| 6 | -2.751067 | -2.223036 | 0.986651  |
| 6 | -4.001238 | -2.875976 | 0.375907  |
| 1 | -4.466711 | -3.520606 | 1.132899  |
| 1 | -4.756414 | -2.150368 | 0.063312  |
| 1 | -3.757574 | -3.508560 | -0.480901 |
| 6 | -1.767827 | -3.344207 | 1.390479  |
| 1 | -1.422853 | -3.925264 | 0.531945  |
| 1 | -0.879441 | -2.939659 | 1.885633  |
| 1 | -2.269647 | -4.031521 | 2.084122  |
| 6 | -0.942613 | -0.563196 | -2.686349 |
| 1 | 0.062006  | -0.533446 | -2.257704 |
| 1 | -0.863527 | -0.852128 | -3.742400 |
| 1 | -1.359305 | 0.446428  | -2.645931 |
| 6 | -1.241943 | -2.972571 | -2.064666 |
| 1 | -0.282932 | -3.044161 | -1.541026 |
| 1 | -1.908650 | -3.741073 | -1.662265 |
| 1 | -1.075172 | -3.207170 | -3.124129 |
| 6 | -0.586947 | 1.264114  | 2.633837  |
| 1 | -1.610361 | 0.981747  | 2.376364  |
| 6 | -0.143465 | 2.984793  | -2.145067 |
| 1 | -1.200157 | 2.708935  | -2.220254 |
| 6 | 3.962721  | 1.625158  | 0.503075  |
| 1 | 4.180560  | 0.699592  | 1.048515  |
| 6 | -0.642853 | 2.680190  | 3.239023  |
| 1 | -1.248688 | 2.684671  | 4.152636  |
| 1 | 0.364328  | 3.030037  | 3.494365  |
| 1 | -1.081733 | 3.394970  | 2.536203  |
| 6 | -0.068177 | 0.259752  | 3.669980  |
| 1 | -0.758077 | 0.209032  | 4.519906  |
| 1 | 0.029635  | -0.742904 | 3.237914  |
| 1 | 0.912248  | 0.549191  | 4.064064  |
| 6 | 4.457503  | 2.806487  | 1.360466  |
| 1 | 3.948754  | 2.837132  | 2.330533  |

|   |           |           |           |
|---|-----------|-----------|-----------|
| 1 | 5.534873  | 2.725113  | 1.544274  |
| 1 | 4.266587  | 3.759182  | 0.851505  |
| 6 | 4.730023  | 1.556736  | -0.821913 |
| 1 | 4.361065  | 0.742193  | -1.452651 |
| 1 | 4.651850  | 2.493263  | -1.387707 |
| 1 | 5.791444  | 1.374282  | -0.626944 |
| 6 | 0.556263  | 2.520775  | -3.435601 |
| 1 | 0.004189  | 2.882389  | -4.310536 |
| 1 | 1.574035  | 2.919516  | -3.507682 |
| 1 | 0.619621  | 1.431702  | -3.496244 |
| 6 | -0.066211 | 4.520890  | -2.046339 |
| 1 | 0.976259  | 4.847393  | -1.953650 |
| 1 | -0.488553 | 4.988272  | -2.943764 |
| 1 | -0.609869 | 4.899707  | -1.175846 |
| 6 | -3.235508 | -1.512227 | -2.600606 |
| 1 | -3.944917 | -2.210103 | -2.153540 |
| 1 | -3.663148 | -0.506643 | -2.553825 |
| 1 | -3.136890 | -1.778553 | -3.661244 |
| 6 | -3.153161 | -1.463640 | 2.263494  |
| 1 | -3.869452 | -0.662081 | 2.064953  |
| 1 | -3.617310 | -2.167703 | 2.965696  |
| 1 | -2.282150 | -1.030573 | 2.760190  |
| 6 | 4.131378  | -2.155281 | 0.078898  |
| 7 | 5.037208  | -1.703959 | 0.649931  |

## TS8

SCF Energy: -2275.39253974

|                                              |              |
|----------------------------------------------|--------------|
| Sum of electronic and zero-point Energies=   | -2274.440485 |
| Sum of electronic and thermal Energies=      | -2274.387091 |
| Sum of electronic and thermal Enthalpies=    | -2274.386147 |
| Sum of electronic and thermal Free Energies= | -2274.525824 |

Electronic energy in solution by single point calculation = -2274.21799073

|    |           |           |           |
|----|-----------|-----------|-----------|
| 46 | -0.368716 | -0.526923 | 0.105735  |
| 15 | 1.463193  | -1.760291 | -0.524053 |
| 6  | 3.149149  | -1.010590 | -0.301560 |
| 6  | 3.395731  | 0.320163  | 0.123366  |
| 6  | 4.261725  | -1.838276 | -0.553624 |
| 6  | 4.727851  | 0.710527  | 0.356091  |
| 6  | 2.391716  | 1.426632  | 0.279968  |
| 6  | 5.572040  | -1.419486 | -0.348905 |
| 1  | 4.104960  | -2.841826 | -0.917010 |
| 6  | 5.808070  | -0.135632 | 0.135281  |
| 1  | 4.902349  | 1.723720  | 0.702422  |

|   |           |           |           |
|---|-----------|-----------|-----------|
| 6 | 2.260172  | 2.367788  | -0.768783 |
| 6 | 1.738889  | 1.652835  | 1.508841  |
| 1 | 6.394916  | -2.096365 | -0.558958 |
| 1 | 6.820006  | 0.210984  | 0.323432  |
| 6 | 1.443123  | 3.482819  | -0.573516 |
| 6 | 0.904429  | 2.769671  | 1.642633  |
| 6 | 0.734636  | 3.695466  | 0.613146  |
| 1 | 1.345062  | 4.211090  | -1.373906 |
| 1 | 0.392492  | 2.920732  | 2.584814  |
| 6 | 1.447245  | -3.288260 | 0.641901  |
| 6 | 1.385131  | -2.314226 | -2.355590 |
| 6 | 2.173685  | -3.582226 | -2.724424 |
| 1 | 2.037171  | -3.771991 | -3.796607 |
| 1 | 3.247496  | -3.478898 | -2.554898 |
| 1 | 1.815868  | -4.466392 | -2.192303 |
| 6 | -0.093846 | -2.553622 | -2.725884 |
| 1 | -0.502533 | -3.434827 | -2.226897 |
| 1 | -0.729761 | -1.706507 | -2.467000 |
| 1 | -0.163391 | -2.723369 | -3.807788 |
| 6 | 1.300427  | -2.734130 | 2.072174  |
| 1 | 0.400912  | -2.125861 | 2.200091  |
| 1 | 1.231151  | -3.579112 | 2.769675  |
| 1 | 2.174686  | -2.143773 | 2.359214  |
| 6 | 0.194738  | -4.114385 | 0.302541  |
| 1 | -0.691985 | -3.482999 | 0.225658  |
| 1 | 0.306734  | -4.673437 | -0.630335 |
| 1 | 0.020641  | -4.842801 | 1.104071  |
| 6 | 3.016748  | 2.229314  | -2.086475 |
| 1 | 3.367419  | 1.196823  | -2.167590 |
| 6 | 2.036747  | 0.788923  | 2.725449  |
| 1 | 2.401823  | -0.173853 | 2.360714  |
| 6 | -0.177003 | 4.910951  | 0.722351  |
| 1 | 0.410891  | 5.776544  | 0.382436  |
| 6 | 4.256172  | 3.143622  | -2.104374 |
| 1 | 4.796188  | 3.043066  | -3.053372 |
| 1 | 3.961154  | 4.193248  | -1.990971 |
| 1 | 4.947263  | 2.899048  | -1.293133 |
| 6 | 2.142057  | 2.520745  | -3.318262 |
| 1 | 2.683184  | 2.254996  | -4.233373 |
| 1 | 1.205681  | 1.956520  | -3.298273 |
| 1 | 1.885439  | 3.583347  | -3.389085 |
| 6 | -0.655490 | 5.205738  | 2.147830  |
| 1 | 0.183245  | 5.314515  | 2.844157  |

|   |           |           |           |
|---|-----------|-----------|-----------|
| 1 | -1.233597 | 6.135638  | 2.165012  |
| 1 | -1.308003 | 4.407948  | 2.522019  |
| 6 | -1.382770 | 4.775903  | -0.229627 |
| 1 | -1.062878 | 4.595224  | -1.260942 |
| 1 | -2.022491 | 3.939490  | 0.070225  |
| 1 | -1.987387 | 5.689992  | -0.215295 |
| 6 | 0.824181  | 0.521913  | 3.626936  |
| 1 | 1.101827  | -0.192237 | 4.411264  |
| 1 | 0.489330  | 1.435635  | 4.131679  |
| 1 | -0.024181 | 0.104468  | 3.080082  |
| 6 | 3.176421  | 1.427695  | 3.543943  |
| 1 | 2.877421  | 2.417044  | 3.909448  |
| 1 | 3.421206  | 0.803933  | 4.411791  |
| 1 | 4.084325  | 1.549223  | 2.945232  |
| 6 | 2.671755  | -4.218192 | 0.633575  |
| 1 | 2.901723  | -4.629211 | -0.351585 |
| 1 | 3.562077  | -3.722018 | 1.025408  |
| 1 | 2.452966  | -5.065391 | 1.295973  |
| 6 | 1.933618  | -1.139826 | -3.184814 |
| 1 | 3.010702  | -1.016389 | -3.043030 |
| 1 | 1.749506  | -1.330671 | -4.249193 |
| 1 | 1.450596  | -0.197553 | -2.924408 |
| 6 | -2.122008 | 1.039062  | 0.468326  |
| 6 | -0.693084 | 0.769656  | -1.455970 |
| 1 | -3.111334 | 1.196367  | 0.899760  |
| 1 | -1.466710 | 1.858173  | 0.770599  |
| 1 | -0.512784 | 0.414788  | -2.469345 |
| 1 | -0.071751 | 1.620935  | -1.186993 |
| 6 | -2.098433 | 0.829057  | -1.015303 |
| 6 | -3.103859 | 0.505236  | -1.885684 |
| 6 | -4.548667 | 0.424991  | -1.709779 |
| 6 | -5.227598 | 0.379181  | -0.472486 |
| 6 | -5.344124 | 0.371042  | -2.877809 |
| 6 | -6.617280 | 0.303359  | -0.413033 |
| 1 | -4.685709 | 0.367613  | 0.459876  |
| 6 | -6.730493 | 0.295180  | -2.817583 |
| 1 | -4.849813 | 0.398171  | -3.846354 |
| 6 | -7.380667 | 0.264383  | -1.580191 |
| 1 | -7.095936 | 0.262266  | 0.561486  |
| 1 | -7.307425 | 0.259125  | -3.738191 |
| 1 | -8.463965 | 0.201149  | -1.529201 |
| 1 | -2.782378 | 0.329034  | -2.912463 |
| 6 | -2.863751 | -1.854341 | 2.161519  |

|   |           |           |          |
|---|-----------|-----------|----------|
| 6 | -3.330550 | -2.408758 | 0.798390 |
| 1 | -4.310179 | -2.891254 | 0.882210 |
| 1 | -3.400041 | -1.616771 | 0.050627 |
| 1 | -2.607119 | -3.149954 | 0.450487 |
| 6 | -2.624000 | -3.000208 | 3.158432 |
| 1 | -1.821702 | -3.634315 | 2.768903 |
| 1 | -2.312334 | -2.595730 | 4.124904 |
| 1 | -3.524167 | -3.608883 | 3.296852 |
| 8 | -1.692418 | -1.079055 | 2.076934 |
| 1 | -1.909060 | -0.059514 | 1.342732 |
| 6 | -3.958479 | -0.984647 | 2.692726 |
| 7 | -4.799076 | -0.279136 | 3.073754 |

## TS9

SCF Energy: -2712.31553376

|                                              |              |
|----------------------------------------------|--------------|
| Sum of electronic and zero-point Energies=   | -2711.230466 |
| Sum of electronic and thermal Energies=      | -2711.167147 |
| Sum of electronic and thermal Enthalpies=    | -2711.166203 |
| Sum of electronic and thermal Free Energies= | -2711.328738 |

Electronic energy in solution by single point calculation = -2711.10643905

|    |           |           |           |
|----|-----------|-----------|-----------|
| 46 | 0.991267  | -0.839087 | -0.154866 |
| 6  | -1.180496 | -2.884837 | -0.377301 |
| 6  | 0.039612  | -3.732905 | -0.062934 |
| 1  | 0.878186  | -3.497095 | -0.719087 |
| 1  | 0.339274  | -3.605013 | 0.978230  |
| 1  | -0.250401 | -4.784627 | -0.205058 |
| 6  | -1.575003 | -2.861369 | -1.849124 |
| 1  | -1.773523 | -3.896310 | -2.159450 |
| 1  | -2.483577 | -2.275779 | -1.999508 |
| 1  | -0.771971 | -2.451005 | -2.466482 |
| 8  | -2.162974 | -3.218261 | 0.473976  |
| 1  | -3.028675 | -2.716319 | 0.250421  |
| 6  | -0.974672 | -1.024422 | -0.092827 |
| 7  | -1.941501 | -0.342242 | 0.038515  |
| 13 | -3.821588 | -0.105087 | 0.224006  |
| 8  | -4.443143 | 0.873146  | -1.070673 |
| 8  | -4.259806 | -1.826908 | -0.003120 |
| 8  | -4.113337 | 0.530153  | 1.813690  |
| 6  | -4.618202 | 0.435353  | -2.401867 |
| 6  | -5.462918 | -2.473619 | 0.410243  |
| 6  | -3.269382 | 0.319486  | 2.930287  |
| 6  | -5.664609 | -3.707508 | -0.466906 |
| 1  | -4.789918 | -4.364864 | -0.409710 |

|    |           |           |           |
|----|-----------|-----------|-----------|
| 1  | -6.546063 | -4.277524 | -0.151550 |
| 1  | -5.799341 | -3.405723 | -1.512304 |
| 6  | -6.651933 | -1.516648 | 0.345203  |
| 1  | -6.493554 | -0.658183 | 1.006970  |
| 1  | -6.790489 | -1.147422 | -0.677232 |
| 1  | -7.572300 | -2.022953 | 0.659240  |
| 6  | -5.814281 | 1.168720  | -3.006718 |
| 1  | -5.632040 | 2.249798  | -2.997333 |
| 1  | -5.997844 | 0.852996  | -4.041030 |
| 1  | -6.714389 | 0.973279  | -2.414672 |
| 6  | -3.338681 | 0.672321  | -3.213565 |
| 1  | -3.121669 | 1.745944  | -3.268326 |
| 1  | -2.485116 | 0.180844  | -2.735355 |
| 1  | -3.437459 | 0.288330  | -4.236630 |
| 6  | -3.270586 | -1.151199 | 3.359864  |
| 1  | -4.291164 | -1.466129 | 3.609465  |
| 1  | -2.898487 | -1.796453 | 2.557805  |
| 1  | -2.635777 | -1.305764 | 4.241587  |
| 6  | -3.725458 | 1.234323  | 4.066247  |
| 1  | -4.752686 | 0.985725  | 4.357234  |
| 1  | -3.078082 | 1.127666  | 4.945433  |
| 1  | -3.709702 | 2.281018  | 3.745718  |
| 1  | -5.336747 | -2.798214 | 1.455119  |
| 1  | -4.834178 | -0.646927 | -2.416995 |
| 1  | -2.235711 | 0.591181  | 2.661919  |
| 15 | 3.359290  | -1.084911 | 0.004363  |
| 6  | 3.981219  | 0.648502  | 0.104705  |
| 6  | 3.057481  | 1.719033  | 0.048604  |
| 6  | 5.355895  | 0.943257  | 0.165365  |
| 6  | 3.558415  | 3.034557  | 0.047196  |
| 6  | 1.544083  | 1.646815  | -0.024054 |
| 6  | 5.830126  | 2.250978  | 0.168501  |
| 1  | 6.071451  | 0.132571  | 0.206208  |
| 6  | 4.921241  | 3.306731  | 0.105895  |
| 1  | 2.846941  | 3.852992  | -0.005858 |
| 6  | 0.905175  | 1.774392  | -1.298719 |
| 6  | 0.795426  | 1.985260  | 1.141359  |
| 1  | 6.898366  | 2.441977  | 0.214376  |
| 1  | 5.269455  | 4.335582  | 0.100459  |
| 6  | -0.401870 | 2.249072  | -1.365812 |
| 6  | -0.509568 | 2.461092  | 1.010501  |
| 6  | -1.119148 | 2.649223  | -0.233642 |
| 1  | -0.867514 | 2.354969  | -2.340512 |

|   |           |           |           |
|---|-----------|-----------|-----------|
| 1 | -1.052372 | 2.733841  | 1.907712  |
| 6 | 3.869311  | -1.925989 | 1.644954  |
| 6 | 4.318358  | -1.897374 | -1.447590 |
| 6 | 5.752397  | -2.366781 | -1.152186 |
| 1 | 6.169702  | -2.814536 | -2.063419 |
| 1 | 6.411197  | -1.541292 | -0.871348 |
| 1 | 5.797891  | -3.126041 | -0.369360 |
| 6 | 3.477464  | -3.104315 | -1.911533 |
| 1 | 3.377099  | -3.871243 | -1.140080 |
| 1 | 2.473177  | -2.785265 | -2.206906 |
| 1 | 3.957456  | -3.568289 | -2.782813 |
| 6 | 2.888934  | -1.398534 | 2.706431  |
| 1 | 1.848192  | -1.571476 | 2.414627  |
| 1 | 3.071870  | -1.911132 | 3.659587  |
| 1 | 3.019775  | -0.328044 | 2.874147  |
| 6 | 3.647506  | -3.444083 | 1.517832  |
| 1 | 2.640645  | -3.673426 | 1.157932  |
| 1 | 4.369016  | -3.925268 | 0.853683  |
| 1 | 3.758969  | -3.902927 | 2.508238  |
| 6 | 1.662762  | 1.533306  | -2.594497 |
| 1 | 2.660028  | 1.178582  | -2.330824 |
| 6 | 1.419096  | 1.938125  | 2.528134  |
| 1 | 2.402432  | 1.470712  | 2.431922  |
| 6 | -2.454648 | 3.356269  | -0.409350 |
| 1 | -3.104837 | 2.689005  | -0.986075 |
| 6 | 1.847029  | 2.840745  | -3.383868 |
| 1 | 2.439088  | 2.662630  | -4.289336 |
| 1 | 0.882652  | 3.262379  | -3.687693 |
| 1 | 2.366359  | 3.591074  | -2.778178 |
| 6 | 0.985008  | 0.451775  | -3.450561 |
| 1 | 1.558109  | 0.261419  | -4.366115 |
| 1 | 0.905381  | -0.485088 | -2.884328 |
| 1 | -0.028207 | 0.748173  | -3.742445 |
| 6 | -2.252757 | 4.653223  | -1.219401 |
| 1 | -1.784951 | 4.464738  | -2.191400 |
| 1 | -3.217946 | 5.140373  | -1.398503 |
| 1 | -1.613126 | 5.356903  | -0.671759 |
| 6 | -3.185345 | 3.663000  | 0.900433  |
| 1 | -3.421724 | 2.748364  | 1.448901  |
| 1 | -2.601792 | 4.334779  | 1.543813  |
| 1 | -4.134959 | 4.161430  | 0.678750  |
| 6 | 0.580909  | 1.093544  | 3.501780  |
| 1 | 1.119654  | 0.949355  | 4.445719  |

|   |           |           |           |
|---|-----------|-----------|-----------|
| 1 | -0.370396 | 1.582860  | 3.735177  |
| 1 | 0.351059  | 0.111855  | 3.077854  |
| 6 | 1.644689  | 3.352315  | 3.092199  |
| 1 | 0.695959  | 3.892300  | 3.185953  |
| 1 | 2.103989  | 3.300312  | 4.086479  |
| 1 | 2.303818  | 3.937012  | 2.442761  |
| 6 | 5.295596  | -1.640496 | 2.140003  |
| 1 | 6.067339  | -1.975801 | 1.444607  |
| 1 | 5.443644  | -0.575009 | 2.333987  |
| 1 | 5.454022  | -2.172456 | 3.087068  |
| 6 | 4.369416  | -0.898106 | -2.615626 |
| 1 | 4.930632  | 0.006347  | -2.366837 |
| 1 | 4.860934  | -1.377959 | -3.471396 |
| 1 | 3.366963  | -0.608697 | -2.933364 |

**TS**

SCF Energy: -286.515865

|                                              |             |
|----------------------------------------------|-------------|
| Sum of electronic and zero-point Energies=   | -286.413255 |
| Sum of electronic and thermal Energies=      | -286.405893 |
| Sum of electronic and thermal Enthalpies=    | -286.404948 |
| Sum of electronic and thermal Free Energies= | -286.444168 |

Electronic energy in solution by single point calculation =-286.419561046

|   |           |           |           |
|---|-----------|-----------|-----------|
| 6 | -0.658949 | -0.003321 | 0.170382  |
| 6 | -0.413835 | -1.474725 | 0.188470  |
| 1 | -0.453535 | -1.884455 | -0.821680 |
| 1 | 0.537324  | -1.729634 | 0.649172  |
| 1 | -1.250270 | -1.904984 | 0.766031  |
| 6 | -1.815866 | 0.539884  | -0.585927 |
| 1 | -2.154273 | 1.484126  | -0.155467 |
| 1 | -1.437978 | 0.734433  | -1.597923 |
| 1 | -2.632128 | -0.183988 | -0.661464 |
| 8 | -0.116977 | 0.802582  | 1.016012  |
| 1 | 0.864527  | 0.532900  | 1.093204  |
| 6 | 1.531518  | 0.204331  | -0.975823 |
| 7 | 2.229277  | 0.133419  | -0.026083 |
